# Supplementary material for: Urea hydrogen-bond donor strengths: bigger is not always better
Source: Royal Society of Chemistry journal article supplement (doi:10.1039/d4cp04042b), 2024-12-05
Supplement: d4cp04042b1.pdf [file d4cp04042b1.pdf]

Electronic Supplementary Material (ESI)

for

## Urea Hydrogen-Bond Donor Strengths: Bigger is not Always Better

Celine Nieuwland,<sup>[a]</sup> Angelina N. van Dam,<sup>[a]</sup>

F. Matthias Bickelhaupt,<sup>[a,b,c]</sup> and Célia Fonseca Guerra\*<sup>[a]</sup>

- 
- [a] Department of Chemistry and Pharmaceutical Sciences, Amsterdam Institute of Molecular and Life Sciences (AIMMS), Vrije Universiteit Amsterdam, De Boelelaan 1108, 1081 HZ Amsterdam, The Netherlands  
E-mail: [c.fonsecaguerra@vu.nl](mailto:c.fonsecaguerra@vu.nl) | Homepage: <https://www.theochem.nl/>
- [b] Institute for Molecules and Materials, Radboud University, Heyendaalseweg 135, 6525 AJ Nijmegen, The Netherlands
- [c] Department of Chemical Sciences, University of Johannesburg, Auckland Park, Johannesburg 2006, South Africa

### Table of Contents

|                                                                                                           |           |
|-----------------------------------------------------------------------------------------------------------|-----------|
| <b>Method S1.</b> Computational details .....                                                             | <b>2</b>  |
| <b>Method S2.</b> Hydrogen-bond and interaction energy analyses .....                                     | <b>3</b>  |
| <b>Method S3.</b> Voronoi deformation density (VDD) charges .....                                         | <b>5</b>  |
| <b>Data S1.</b> Formaldehyde–X-urea complexes (X = O, S, Se) .....                                        | <b>6</b>  |
| <b>Data S2.</b> Geometries of the (di)aryl substituted X-urea derivatives (X = O, S, Se) .....            | <b>8</b>  |
| <b>Data S3.</b> Asymmetric formaldehyde–1,3-disubstituted X-urea complexes (X = O, S, Se) ....            | <b>9</b>  |
| <b>Data S4.</b> Formaldehyde–X-urea complexes (X = C, Si, Ge) .....                                       | <b>11</b> |
| <b>Data S5.</b> 1,3-bis[3-(CF <sub>3</sub> )phenyl]urea vs. 1,3-bis[4-(CF <sub>3</sub> )phenyl]urea ..... | <b>13</b> |
| <b>Data S6.</b> Cartesian coordinates and energies of optimized monomers .....                            | <b>14</b> |
| <b>Data S7.</b> Cartesian coordinates and energies of optimized hydrogen-bonded complexes .               | <b>39</b> |

## Method S1. Computational details

---

All calculations were performed using the Amsterdam Density Functional (ADF) program as implemented in the Amsterdam Modeling Suite (AMS, version 2023.1).<sup>[S1]</sup> The dispersion-corrected relativistic density functional theory (DFT-D) calculations were performed at the ZORA-BLYP-D3(BJ)<sup>[S2]</sup>/TZ2P level of theory, which has been proven to be adequate for studying these types of hydrogen-bonded systems.<sup>[S3]</sup> The TZ2P basis set<sup>[S1a,b]</sup> consists of an uncontracted set of Slater-type orbitals (STOs) of triple- $\zeta$  quality for all atoms, augmented with two sets of polarization functions. The ZlmFit<sup>[S4a]</sup> density fitting scheme with the Becke<sup>[S4b,c]</sup> integration grid, at “Excellent” quality, was used for geometry optimizations and subsequent (bonding) analyses. All optimized geometries have been checked to be energy minima by performing a vibrational frequency analysis (*i.e.*, no imaginary frequencies for minima, see Data S6 and S7).<sup>[S5]</sup> The ball-and-stick structures of the optimized structures in this work were created using the CYLview20<sup>[S6]</sup> visualization software.

- 
- [S1] (a) G. te Velde, F. M. Bickelhaupt, E. J. Baerends, C. Fonseca Guerra, S. J. A. van Gisbergen and J. G. Snijders, T. Ziegler, *J. Comput. Chem.*, 2001, **22**, 931; (b) E. van Lenthe, E. J. Baerends, *J. Comput. Chem.*, 2003, **24**, 1142; (c) C. Fonseca Guerra, J. G. Snijders, G. te Velde and E. J. Baerends, *Theor. Chem. Acc.*, 1998, **99**, 391; (d) ADF 2023.1, SCM, Theoretical Chemistry, Vrije Universiteit Amsterdam, Amsterdam, The Netherlands, [www.scm.com](http://www.scm.com); (e) AMS 2023.1, SCM, Theoretical Chemistry, Vrije Universiteit Amsterdam, Amsterdam, The Netherlands, [www.scm.com](http://www.scm.com).
- [S2] (a) E. van Lenthe, A. Ehlers and E. J. Baerends, *J. Chem. Phys.*, 1999, **110**, 8943; (b) A. D. Becke, *Phys. Rev. A*, 1988, **38**, 3098; (c) C. Lee, W. Yang and R. G. Parr, *Phys. Rev. B*, 1988, **37**, 785; (d) Q. Wu and W. Yang, *J. Chem. Phys.*, 2002, **116**, 515; (e) S. Grimme, *J. Comput. Chem.*, 2004, **25**, 1463; (f) S. Grimme, *J. Comput. Chem.*, 2006, **27**, 1787; (g) S. Grimme, J. Antony, S. Ehrlich and H. Krieg, *J. Chem. Phys.*, 2010, **132**, 154104; (h) S. Grimme, S. Ehrlich and L. Goerigk, *J. Comput. Chem.*, 2011, **32**, 1456; (i) A. D. Becke and E. R. Johnson, *J. Chem. Phys.*, 2005, **122**, 154101; (j) E. R. Johnson and A. D. Becke, *J. Chem. Phys.*, 2006, **124**, 024101.
- [S3] C. Nieuwland and C. Fonseca Guerra, *Chem. Eur. J.*, 2022, **28**, e202200755.
- [S4] (a) M. Franchini, P. H. T. Philipsen, E. van Lenthe and L. Visscher, *J. Chem. Theory Comput.*, 2014, **10**, 1994; (b) A. D. Becke, *J. Chem. Phys.*, 1998, **88**, 2547; (c) M. Franchini, P. H. T. Philipsen and L. Visscher, *J. Comput. Chem.*, 2013, **34**, 1819.
- [S5] (a) S. K. Wolff, *Int. J. Quantum Chem.*, 2005, **104**, 645; (b) A. Bérces, R. M. Dickson, L. Fan, H. Jacobsen, D. P. Swerhone and T. Ziegler, *Comput. Phys. Commun.*, 1997, **100**, 247; (c) H. Jacobsen, A. Bérces, D. P. Swerhone and T. Ziegler, *Comput. Phys. Commun.*, 1997, **100**, 263.
- [S6] C. Y. Legault, *CYLview20*, Université de Sherbrooke, Sherbrooke, Quebec, Canada, 2020, [www.cylview.org](http://www.cylview.org).

## Method S2. Hydrogen-bond and interaction energy analyses

---

In this work, the hydrogen-bond energy between the various urea hydrogen-bond donors (**X-urea**, with X = O, S, Se, C, Si, or Ge) and the hydrogen-bond acceptor formaldehyde (**F**) was computed. The hydrogen-bond energy ( $\Delta E$ ) is computed following Equation S1.

$$\Delta E = E(\mathbf{F}\cdots\mathbf{X}\text{-urea}) - E(\mathbf{F}) - E(\mathbf{X}\text{-urea}) \quad (\text{S1})$$

In this equation,  $E(\mathbf{F}\cdots\mathbf{X}\text{-urea})$ ,  $E(\mathbf{F})$ , and  $E(\mathbf{X}\text{-urea})$  correspond to the electronic energies  $E$  of the formaldehyde–X-urea hydrogen-bonded complex ( $\mathbf{F}\cdots\mathbf{X}\text{-urea}$ ), formaldehyde, and the X-urea, each in their optimized geometry, respectively.

To understand the different components that determine the relative stabilities of the  $\mathbf{F}\cdots\mathbf{X}\text{-urea}$  complexes,  $\Delta E$  was partitioned according to the activation strain model (ASM)<sup>[S7]</sup> of reactivity and bonding into a strain and interaction energy component (Equation S2).

$$\Delta E = \Delta E_{\text{strain}} + \Delta E_{\text{int}} \quad (\text{S2})$$

In this decomposition, the strain energy ( $\Delta E_{\text{strain}}$ ) is the energy required to deform the separately optimized geometries of the X-urea and formaldehyde molecules, to the geometry they acquire in the hydrogen-bonded complex. The interaction energy ( $\Delta E_{\text{int}}$ ) accounts for the stabilizing interaction between the two prepared (*i.e.*, deformed) molecules.

The interaction energy  $\Delta E_{\text{int}}$  can be further decomposed based on Kohn-Sham molecular orbital theory using a quantitative energy decomposition analysis (EDA).<sup>[S8]</sup> In the EDA, the total interaction energy ( $\Delta E_{\text{int}}$ ) is decomposed into components of electrostatic interaction ( $\Delta V_{\text{elstat}}$ ), Pauli repulsion ( $\Delta E_{\text{Pauli}}$ ), orbital interaction ( $\Delta E_{\text{oi}}$ ), and dispersion ( $\Delta E_{\text{disp}}$ ) (see Equation S3).

$$\Delta E_{\text{int}} = \Delta V_{\text{elstat}} + \Delta E_{\text{Pauli}} + \Delta E_{\text{oi}} + \Delta E_{\text{disp}} \quad (\text{S3})$$

---

[S7] (a) P. Vermeeren, S. C. C. van der Lubbe, C. Fonseca Guerra, F. M. Bickelhaupt and T. A. Hamlin, *Nat. Protoc.*, 2020, **15**, 649; (b) P. Vermeeren, T. A. Hamlin and F. M. Bickelhaupt, *Chem. Commun.*, 2021, **57**, 5880.

[S8] (a) F. M. Bickelhaupt and E. J. Baerends, in *Reviews in Computational Chemistry*, eds. K. B. Lipkowitz and D. B. Boyd, Wiley-VCH, New York, Vol. **15**, 2000, pp. 1–86; (b) T. A. Hamlin, P. Vermeeren, C. Fonseca Guerra and F. M. Bickelhaupt, in *Complementary Bonding Analysis*, ed. S. Grabowsky, De Gruyter, Berlin, 2021, pp. 199–212.

Here,  $\Delta V_{\text{elstat}}$  comprises the (usually attractive) classical electrostatic interactions between the unperturbed charge distributions of the prepared (*i.e.*, deformed) interacting molecules, that is, the X-urea and formaldehyde.  $\Delta E_{\text{Pauli}}$  accounts for the destabilizing interactions between the interacting molecules resulting from overlapping closed-shell orbitals and accounts for any steric repulsion. The  $\Delta E_{\text{oi}}$  term comprises charge transfer between the interacting molecules (*i.e.*, donor–acceptor interactions between occupied and unoccupied orbitals on the interacting molecules, including HOMO–LUMO interactions) and mutual polarization of the interacting molecules (*i.e.*, empty–occupied orbital mixing on one molecule due to the presence of the other molecule).

### Method S3. Voronoi deformation density (VDD) charges

---

The Voronoi deformation density (VDD) charge analysis allows for the quantification of the flow of electronic charge as a direct consequence of chemical-bond formation.<sup>[S9]</sup> VDD atomic charges ( $Q$ ) are computed by the spatial integration of the deformation density over the Voronoi cell of atom A, which is the space defined by the bond midplanes on and perpendicular to all bond axes between this atom A and its neighboring atoms (see Equation S4).

$$Q = - \int_{\text{Voronoi cell of A}} [\rho(\mathbf{r}) - \sum_i \rho_i(\mathbf{r})] d\mathbf{r} \quad (\text{S4})$$

Herein, the deformation density  $\Delta\rho(\mathbf{r}) = [\rho(\mathbf{r}) - \sum_i \rho_i(\mathbf{r})]$  is the density change going from a superposition of the original atomic densities at the positions of the molecule to the actual density of that molecule. This atomic or so-called *promolecular* density is defined as the sum of the (spherically averaged) ground-state atomic densities  $\sum_i \rho_i(\mathbf{r})$ . This is the fictitious state in which the charge density has not been affected by chemical bonding and in which all atoms have zero charge.  $Q$  in Equation S4 then represents the amount of charge that, due to chemical bonding, flows to a position closer to nucleus A ( $Q < 0$ ) or to a position further away from nucleus A ( $Q > 0$ ).

---

[S9] (a) C. Nieuwland, P. Vermeeren, F. M. Bickelhaupt and C. Fonseca Guerra, *J. Comput. Chem.*, 2023, **44**, 2108; (b) C. Fonseca Guerra, J. W. Handgraaf, E. J. Baerends and F. M. Bickelhaupt, *J. Comput. Chem.*, 2004, **25**, 189; (c) O. A. Stasyuk, H. Szatyłowicz, T. M. Krygowski and C. Fonseca Guerra, *Phys. Chem. Chem. Phys.*, 2016, **18**, 11624.

## Data S1. Formaldehyde–X-urea complexes (X = O, S, Se)

**Table S1.** Decomposition of the hydrogen-bond energy  $\Delta E$  (in kcal mol<sup>-1</sup>) of the formaldehyde–1-monosubstituted X-urea (X = O, S, or Se) complexes.<sup>[a,b,c]</sup>

| R <sup>1</sup>                                                    | R <sup>3</sup> | X  | $\Delta E$ | $\Delta E_{\text{strain}}$ | $\Delta E_{\text{int}}$ | $\Delta V_{\text{elstat}}$ | $\Delta E_{\text{Pauli}}$ | $\Delta E_{\text{oi}}$ | $\Delta E_{\text{disp}}$ |
|-------------------------------------------------------------------|----------------|----|------------|----------------------------|-------------------------|----------------------------|---------------------------|------------------------|--------------------------|
| H                                                                 | H              | O  | -5.2       | 0.4                        | -5.6                    | -7.0                       | 5.6                       | -2.7                   | -1.6                     |
|                                                                   |                | S  | -6.3       | 0.5                        | -6.8                    | -8.4                       | 6.9                       | -3.6                   | -1.7                     |
|                                                                   |                | Se | -6.8       | 0.3                        | -7.1                    | -9.0                       | 7.6                       | -3.9                   | -1.8                     |
| Cyclohexyl                                                        | H              | O  | -5.1       | 0.3                        | -5.4                    | -6.7                       | 6.1                       | -2.8                   | -2.0                     |
|                                                                   |                | S  | -6.0       | 0.3                        | -6.3                    | -7.9                       | 7.4                       | -3.5                   | -2.2                     |
|                                                                   |                | Se | -6.4       | 0.2                        | -6.6                    | -8.5                       | 7.9                       | -3.9                   | -2.2                     |
| Ph                                                                | H              | O  | -7.1       | 0.3                        | -7.5                    | -8.4                       | 8.4                       | -3.6                   | -3.9                     |
|                                                                   |                | S  | -7.6       | 0.4                        | -8.0                    | -8.9                       | 9.1                       | -3.9                   | -4.3                     |
|                                                                   |                | Se | -7.7       | 0.4                        | -8.2                    | -9.7                       | 10.1                      | -4.6                   | -3.9                     |
| 3-(CF <sub>3</sub> )C <sub>6</sub> H <sub>4</sub>                 | H              | O  | -8.0       | 0.3                        | -8.3                    | -9.5                       | 8.7                       | -4.7                   | -2.9                     |
|                                                                   |                | S  | -8.5       | 0.5                        | -9.0                    | -10.4                      | 9.7                       | -5.2                   | -3.1                     |
|                                                                   |                | Se | -8.7       | 0.5                        | -9.2                    | -10.8                      | 10.1                      | -5.4                   | -3.1                     |
| 3,5-(CF <sub>3</sub> ) <sub>2</sub> C <sub>6</sub> H <sub>3</sub> | H              | O  | -8.4       | 0.4                        | -8.7                    | -10.0                      | 8.8                       | -4.9                   | -2.7                     |
|                                                                   |                | S  | -8.7       | 0.7                        | -9.4                    | -10.8                      | 9.8                       | -5.4                   | -3.0                     |
|                                                                   |                | Se | -8.9       | 0.7                        | -9.6                    | -11.1                      | 10.3                      | -5.7                   | -3.1                     |

[a] All computed at ZORA-BLYP-D3(BJ)/TZ2P in C<sub>1</sub> symmetry. [b]  $\Delta E = \Delta E_{\text{strain}} + \Delta E_{\text{int}}$ ;  $\Delta E_{\text{int}} = \Delta V_{\text{elstat}} + \Delta E_{\text{Pauli}} + \Delta E_{\text{oi}} + \Delta E_{\text{disp}}$  (see Method S2 for details). [c] See Figure 2 in the main text for the corresponding structures.

**Table S2.** Decomposition of the hydrogen-bond energy  $\Delta E$  (in kcal mol<sup>-1</sup>) of the symmetric formaldehyde–1,3-disubstituted X-urea (X = O, S, or Se) complexes.<sup>[a,b,c]</sup>

| R <sup>1</sup>                                                    | R <sup>3</sup>                                                    | X  | $\Delta E$ | $\Delta E_{\text{strain}}$ | $\Delta E_{\text{int}}$ | $\Delta V_{\text{elstat}}$ | $\Delta E_{\text{Pauli}}$ | $\Delta E_{\text{oi}}$ | $\Delta E_{\text{disp}}$ |
|-------------------------------------------------------------------|-------------------------------------------------------------------|----|------------|----------------------------|-------------------------|----------------------------|---------------------------|------------------------|--------------------------|
| H                                                                 | H                                                                 | O  | -5.2       | 0.4                        | -5.6                    | -7.0                       | 5.6                       | -2.7                   | -1.6                     |
|                                                                   |                                                                   | S  | -6.3       | 0.5                        | -6.8                    | -8.4                       | 6.9                       | -3.6                   | -1.7                     |
|                                                                   |                                                                   | Se | -6.8       | 0.3                        | -7.1                    | -9.0                       | 7.6                       | -3.9                   | -1.8                     |
| Cyclohexyl                                                        | Cyclohexyl                                                        | O  | -5.0       | 0.3                        | -5.3                    | -6.5                       | 6.2                       | -2.8                   | -2.2                     |
|                                                                   |                                                                   | S  | -6.0       | 0.1                        | -6.1                    | -7.7                       | 7.5                       | -3.5                   | -2.4                     |
|                                                                   |                                                                   | Se | -6.3       | 0.1                        | -6.4                    | -8.2                       | 8.1                       | -3.8                   | -2.5                     |
| Ph                                                                | Ph                                                                | O  | -7.8       | 0.1                        | -7.9                    | -9.5                       | 8.6                       | -4.4                   | -2.6                     |
|                                                                   |                                                                   | S  | -7.2       | 0.6                        | -7.8                    | -9.6                       | 9.0                       | -4.6                   | -2.7                     |
|                                                                   |                                                                   | Se | -7.2       | 0.5                        | -7.7                    | -9.7                       | 9.2                       | -4.6                   | -2.6                     |
| 3-(CF <sub>3</sub> )C <sub>6</sub> H <sub>4</sub>                 | 3-(CF <sub>3</sub> )C <sub>6</sub> H <sub>4</sub>                 | O  | -9.7       | 0.2                        | -9.9                    | -11.3                      | 9.6                       | -5.4                   | -2.7                     |
|                                                                   |                                                                   | S  | -9.1       | 1.3                        | -10.4                   | -12.0                      | 10.6                      | -5.9                   | -3.1                     |
|                                                                   |                                                                   | Se | -8.9       | 0.8                        | -9.7                    | -11.6                      | 10.3                      | -5.6                   | -2.8                     |
| 3,5-(CF <sub>3</sub> ) <sub>2</sub> C <sub>6</sub> H <sub>3</sub> | 3,5-(CF <sub>3</sub> ) <sub>2</sub> C <sub>6</sub> H <sub>3</sub> | O  | -10.6      | 0.2                        | -10.8                   | -12.2                      | 10.0                      | -5.9                   | -2.7                     |
|                                                                   |                                                                   | S  | -9.7       | 1.1                        | -10.8                   | -12.4                      | 10.6                      | -6.1                   | -2.9                     |
|                                                                   |                                                                   | Se | -9.5       | 0.7                        | -10.2                   | -12.1                      | 10.4                      | -5.9                   | -2.7                     |

[a] All computed at ZORA-BLYP-D3(BJ)/TZ2P in C<sub>1</sub> symmetry. [b]  $\Delta E = \Delta E_{\text{strain}} + \Delta E_{\text{int}}$ ;  $\Delta E_{\text{int}} = \Delta V_{\text{elstat}} + \Delta E_{\text{Pauli}} + \Delta E_{\text{oi}} + \Delta E_{\text{disp}}$  (see Method S2 for details). [c] See Figure 3 in the main text for the corresponding structures.

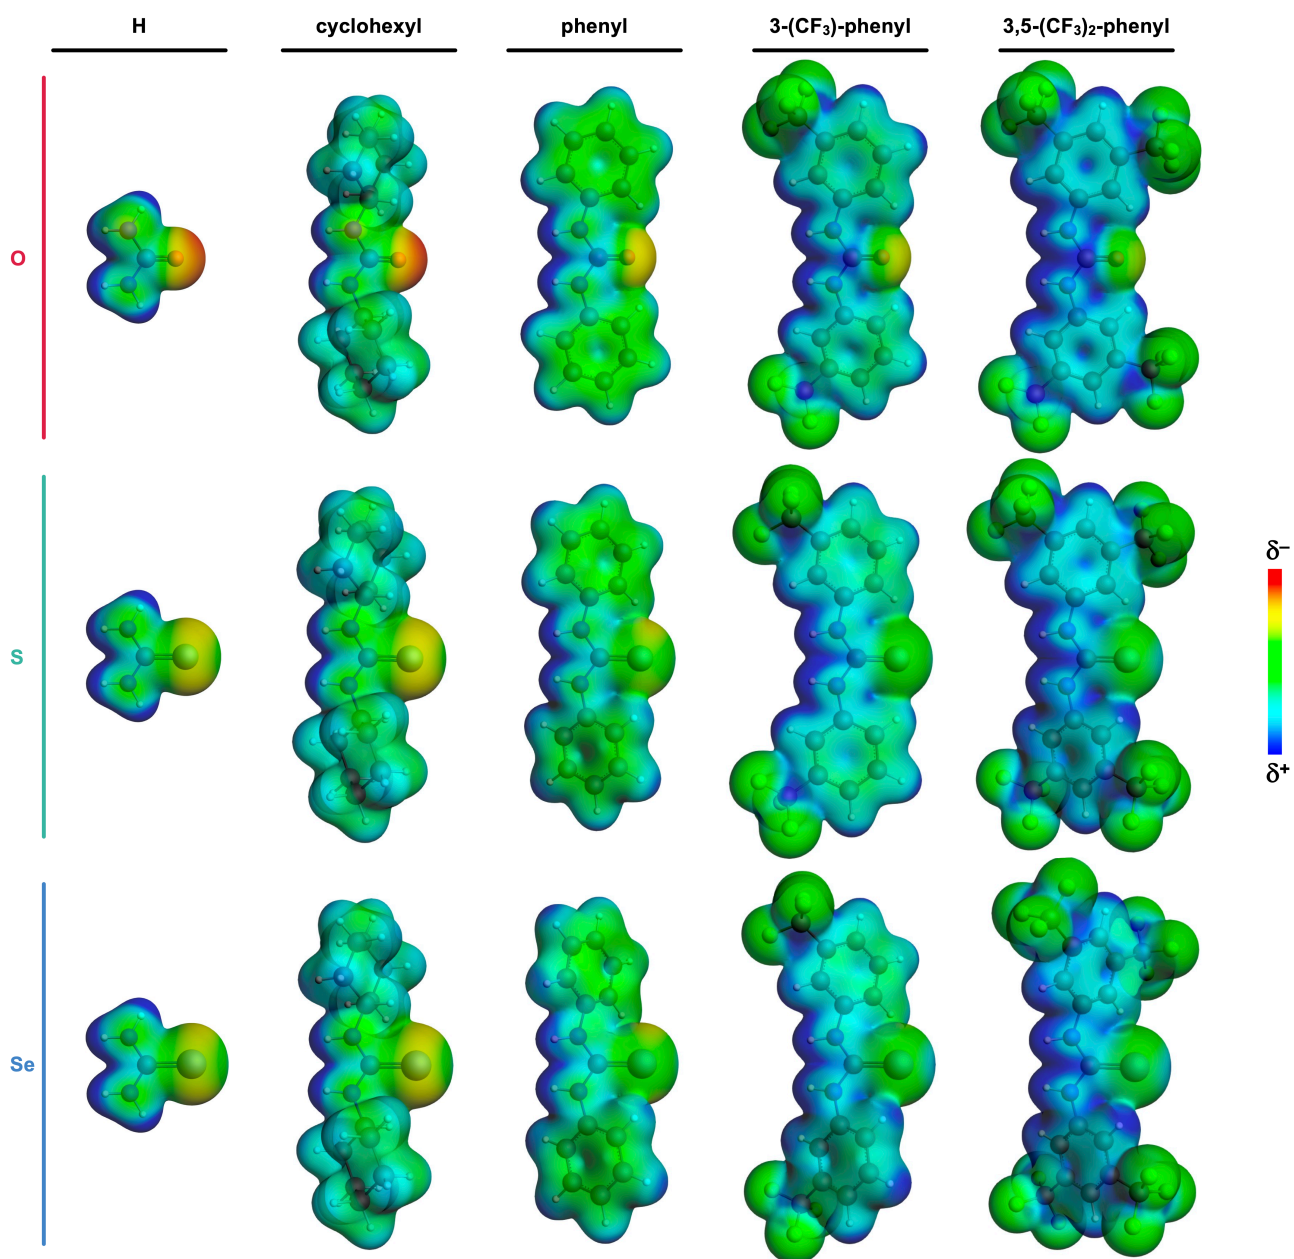

**Figure S1.** Molecular electrostatic potential surfaces (at 0.01 a.u.) from  $-0.1$  (red) to  $+0.1$  (blue) a.u. of the isolated 1,3-disubstituted X-urea derivatives ( $X = \text{O}, \text{S},$  or  $\text{Se}; \text{R}^1 = \text{R}^3$ ) in the geometry of the hydrogen-bonded complex with formaldehyde.

## Data S2. Geometries of the (di)aryl substituted X-urea derivatives (X = O, S, Se)

**Table S3.** XC–C<sub>Ar</sub>C<sub>Ar</sub> dihedral angle  $\theta$  (in degrees; highlighted in blue below) of the 1-aryl monosubstituted X-urea derivatives (X = O, S, or Se) in the equilibrium geometry of the X-urea monomer ( $\theta_{\text{monomer}}$ ) and that of the hydrogen-bonded complex with formaldehyde ( $\theta_{\text{complex}}$ ).<sup>[a]</sup>

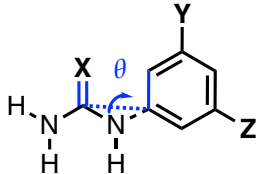

| X  | Y               | Z               | $\theta_{\text{monomer}}$ | $\theta_{\text{complex}}$ | $\Delta\theta_{\text{monomer} \rightarrow \text{complex}}^{[b]}$ |
|----|-----------------|-----------------|---------------------------|---------------------------|------------------------------------------------------------------|
| O  | H               | H               | 6.0                       | 3.0                       | -3.0                                                             |
| S  |                 |                 | 25.6                      | 1.8                       | -23.8                                                            |
| Se |                 |                 | 30.8                      | 12.1                      | -18.7                                                            |
| O  | H               | CF <sub>3</sub> | 5.4                       | 0.7                       | -4.7                                                             |
| S  |                 |                 | 23.0                      | 4.4                       | -18.6                                                            |
| Se |                 |                 | 32.4                      | 7.5                       | -24.9                                                            |
| O  | CF <sub>3</sub> | CF <sub>3</sub> | 6.8                       | 0.1                       | -6.7                                                             |
| S  |                 |                 | 34.0                      | 3.1                       | -30.9                                                            |
| Se |                 |                 | 35.9                      | 15.3                      | -20.6                                                            |

[a] Optimized at ZORA-BLYP-D3(BJ)/TZ2P in C<sub>1</sub> symmetry. [b] Change in  $\theta$  going from the equilibrium geometry of the monomer to that of the hydrogen-bonded complex with formaldehyde (see Figure 2 in the main text for the corresponding structures).

**Table S4.** XC–C<sub>Ar</sub>C<sub>Ar</sub> dihedral angle  $\theta$  (in degrees; highlighted in blue below) of the 1,3-diaryl symmetrically disubstituted X-urea derivatives (X = O, S, or Se) in the equilibrium geometry of the X-urea monomer ( $\theta_{\text{monomer}}$ ) and that of the hydrogen-bonded complex with formaldehyde ( $\theta_{\text{complex}}$ ).<sup>[a]</sup>

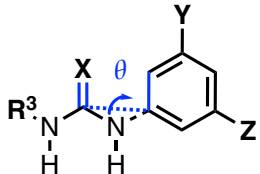

| X  | R <sup>3</sup>                                                    | Y               | Z               | $\theta_{\text{monomer}}$ | $\theta_{\text{complex}}$ | $\Delta\theta_{\text{monomer} \rightarrow \text{complex}}^{[b]}$ |
|----|-------------------------------------------------------------------|-----------------|-----------------|---------------------------|---------------------------|------------------------------------------------------------------|
| O  | Ph                                                                | H               | H               | 0.6                       | 0.1                       | -0.5                                                             |
| S  |                                                                   |                 |                 | 38.0                      | 24.4                      | -13.6                                                            |
| Se |                                                                   |                 |                 | 42.6                      | 34.5                      | -8.1                                                             |
| O  | 3-(CF <sub>3</sub> )C <sub>6</sub> H <sub>4</sub>                 | H               | CF <sub>3</sub> | 1.6                       | 0.4                       | -1.2                                                             |
| S  |                                                                   |                 |                 | 38.5                      | 6.3                       | -32.2                                                            |
| Se |                                                                   |                 |                 | 41.6                      | 28.6                      | -13.0                                                            |
| O  | 3,5-(CF <sub>3</sub> ) <sub>2</sub> C <sub>6</sub> H <sub>3</sub> | CF <sub>3</sub> | CF <sub>3</sub> | 2.6                       | 1.0                       | -1.6                                                             |
| S  |                                                                   |                 |                 | 40.0                      | 21.7                      | -18.3                                                            |
| Se |                                                                   |                 |                 | 43.4                      | 35.9                      | -7.5                                                             |

[a] Optimized at ZORA-BLYP-D3(BJ)/TZ2P in C<sub>1</sub> symmetry. [b] Change in  $\theta$  going from the equilibrium geometry of the monomer to that of the hydrogen-bonded complex with formaldehyde (see Figure 3 in the main text for the corresponding structures).



**Data S3.** Asymmetric formaldehyde–1,3-disubstituted X-urea complexes (X = O, S, Se)

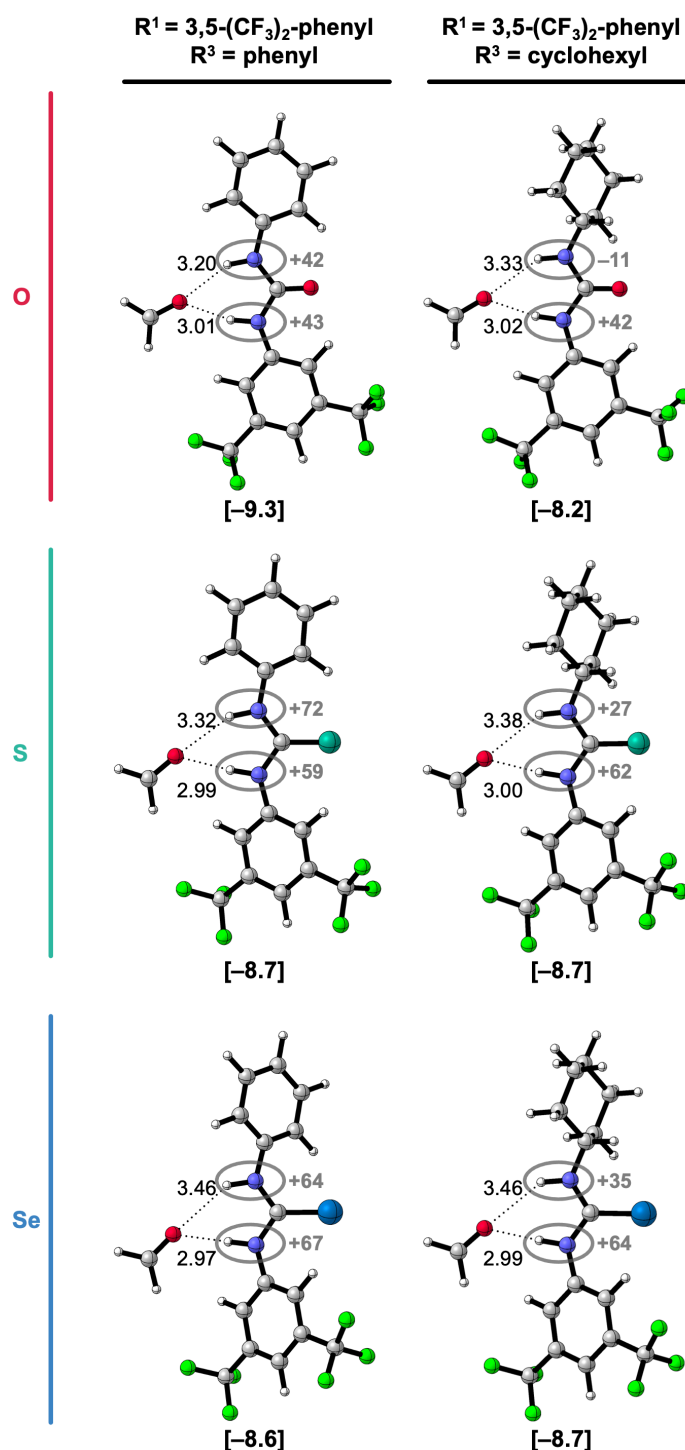

**Figure S2.** Equilibrium hydrogen-bonded complexes of formaldehyde with asymmetrically 1,3-disubstituted X-urea derivatives (X = O, S, or Se;  $R^1 \neq R^3$ ). The equilibrium hydrogen-bond ( $\text{O}\cdots(\text{H})\text{N}$ ) distances (in Å) are indicated and the hydrogen-bond energies  $\Delta E$  (in  $\text{kcal mol}^{-1}$ ) are shown below the structures between square brackets. The total Voronoi deformation density (VDD) atomic charge  $Q_{\text{NH}}$  of the NH groups (in milli-electrons) of the isolated X-urea in the geometry of the hydrogen-bonded complex is highlighted in grey. Color code of the ball-and-stick structures: H = white; C = grey; N = dark blue; O = pink; F = green; S = turquoise; Se = light blue.

**Table S5.** Decomposition of the hydrogen-bond energy  $\Delta E$  (in kcal mol<sup>-1</sup>) of the asymmetric formaldehyde–1,3-disubstituted X-urea (X = O, S, or Se) complexes.<sup>[a,b,c]</sup>

| R <sup>1</sup>                                                    | R <sup>3</sup> | X  | $\Delta E$ | $\Delta E_{\text{strain}}$ | $\Delta E_{\text{int}}$ | $\Delta V_{\text{elstat}}$ | $\Delta E_{\text{Pauli}}$ | $\Delta E_{\text{oi}}$ | $\Delta E_{\text{disp}}$ |
|-------------------------------------------------------------------|----------------|----|------------|----------------------------|-------------------------|----------------------------|---------------------------|------------------------|--------------------------|
| 3,5-(CF <sub>3</sub> ) <sub>2</sub> C <sub>6</sub> H <sub>3</sub> | Ph             | O  | -9.3       | 0.2                        | -9.5                    | -10.8                      | 9.6                       | -5.3                   | -2.9                     |
|                                                                   |                | S  | -8.7       | 1.1                        | -9.8                    | -11.1                      | 10.6                      | -5.8                   | -3.5                     |
|                                                                   |                | Se | -8.6       | 0.8                        | -9.3                    | -10.8                      | 10.5                      | -5.6                   | -3.5                     |
| 3,5-(CF <sub>3</sub> ) <sub>2</sub> C <sub>6</sub> H <sub>3</sub> | Cyclohexyl     | O  | -8.2       | 0.2                        | -8.4                    | -9.6                       | 8.9                       | -4.8                   | -3.0                     |
|                                                                   |                | S  | -8.7       | 0.4                        | -9.1                    | -10.4                      | 10.0                      | -5.3                   | -3.4                     |
|                                                                   |                | Se | -8.7       | 0.5                        | -9.2                    | -10.6                      | 10.3                      | -5.5                   | -3.4                     |

[a] All computed at ZORA-BLYP-D3(BJ)/TZ2P in C<sub>1</sub> symmetry. [b]  $\Delta E = \Delta E_{\text{strain}} + \Delta E_{\text{int}}$ ;  $\Delta E_{\text{int}} = \Delta V_{\text{elstat}} + \Delta E_{\text{Pauli}} + \Delta E_{\text{oi}} + \Delta E_{\text{disp}}$  (see Method S2 for details). [c] See Figure S2 for the corresponding structures.

**Table S6.** XC–C<sub>Ar</sub>C<sub>Ar</sub> dihedral angle  $\theta$  (in degrees; highlighted in blue below) of the aromatic 1,3-asymmetrically disubstituted X-urea derivatives (X = O, S, or Se) in the equilibrium geometry of the X-urea monomer ( $\theta_{\text{monomer}}$ ) and that of the hydrogen-bonded complex with formaldehyde ( $\theta_{\text{complex}}$ ).<sup>[a]</sup>

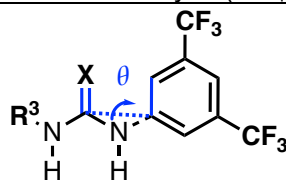

| X  | R <sup>3</sup>    | $\theta_{\text{monomer}}$ | $\theta_{\text{complex}}$ | $\Delta\theta_{\text{monomer} \rightarrow \text{complex}}$ <sup>[b]</sup> |
|----|-------------------|---------------------------|---------------------------|---------------------------------------------------------------------------|
| O  | Ph <sup>[c]</sup> | 1.4 (0.6)                 | 0.8 (0.1)                 | -0.6 (-0.5)                                                               |
| S  |                   | 41.1 (35.9)               | 30.0 (4.8)                | -11.1 (-31.1)                                                             |
| Se |                   | 43.5 (42.5)               | 34.3 (34.7)               | -9.2 (-7.8)                                                               |
| O  | cyclohexyl        | 5.9                       | 1.1                       | -4.8                                                                      |
| S  |                   | 37.5                      | 24.0                      | -13.5                                                                     |
| Se |                   | 41.0                      | 31.0                      | -10.0                                                                     |

[a] Optimized at ZORA-BLYP-D3(BJ)/TZ2P in C<sub>1</sub> symmetry. [b] Change in  $\theta$  going from the equilibrium geometry of the monomer to that of the hydrogen-bonded complex with formaldehyde (see Figure S2 for the corresponding structures). [c] The dihedral angle  $\theta'$  (in degrees) of the phenyl substituent (*i.e.*, R<sup>3</sup> = Ph) is denoted in between parentheses.

**Data S4.** Formaldehyde–X-urea complexes (X = C, Si, Ge)

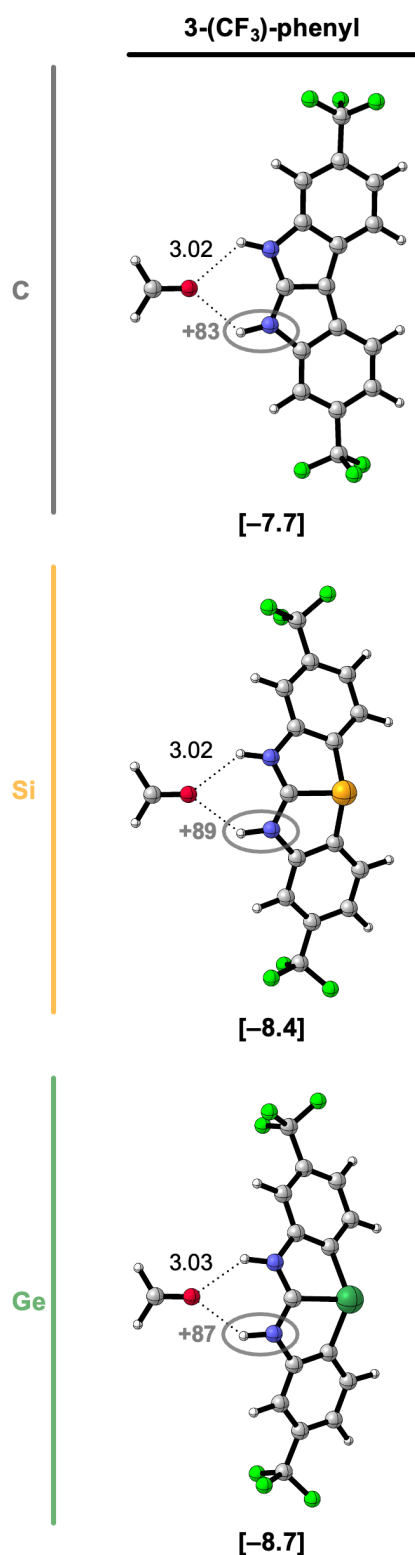

**Figure S3.** Equilibrium hydrogen-bonded complexes of formaldehyde with 1,3-(3-CF<sub>3</sub>-phenyl)-disubstituted predistorted X-urea derivatives (X = C, Si, or Ge). The equilibrium hydrogen-bond (O···(H)N) distances (in Å) are indicated and the hydrogen-bond energies  $\Delta E$  (in kcal mol<sup>-1</sup>) are shown below the structures between square brackets. The total Voronoi deformation density (VDD) atomic charge  $Q_{\text{NH}}$  of the NH groups (in millielectrons) of the isolated X-urea in the geometry of the hydrogen-bonded complex is highlighted in grey. Color code of the ball-and-stick structures: H = white; C = grey; N = dark blue; O = pink; F = green; Si = yellow; Ge = dark green.

**Table S7.** Decomposition of the hydrogen-bond energy  $\Delta E$  (in kcal mol<sup>-1</sup>) of the formaldehyde–1,3-disubstituted predistorted X-urea (X = C, Si, or Ge) complexes.<sup>[a,b,c]</sup>



| X  | $\Delta E$ | $\Delta E_{\text{strain}}$ | $\Delta E_{\text{int}}$ | $\Delta V_{\text{elstat}}$ | $\Delta E_{\text{Pauli}}$ | $\Delta E_{\text{oi}}$ | $\Delta E_{\text{disp}}$ |
|----|------------|----------------------------|-------------------------|----------------------------|---------------------------|------------------------|--------------------------|
| C  | -7.7       | 0.3                        | -8.0                    | -8.7                       | 5.8                       | -3.0                   | -2.1                     |
| Si | -8.4       | 0.3                        | -8.7                    | -10.1                      | 7.7                       | -4.1                   | -2.3                     |
| Ge | -8.7       | 0.2                        | -8.9                    | -10.6                      | 8.4                       | -4.4                   | -2.3                     |

[a] All computed at ZORA-BLYP-D3(BJ)/TZ2P in  $C_1$  symmetry. [b]  $\Delta E = \Delta E_{\text{strain}} + \Delta E_{\text{int}}$ ;  $\Delta E_{\text{int}} = \Delta V_{\text{elstat}} + \Delta E_{\text{Pauli}} + \Delta E_{\text{oi}} + \Delta E_{\text{disp}}$ . [c] See Figure S3 for the corresponding structures.

**Data S5.** 1,3-bis[3-(CF<sub>3</sub>)phenyl]urea vs. 1,3-bis[4-(CF<sub>3</sub>)phenyl]urea

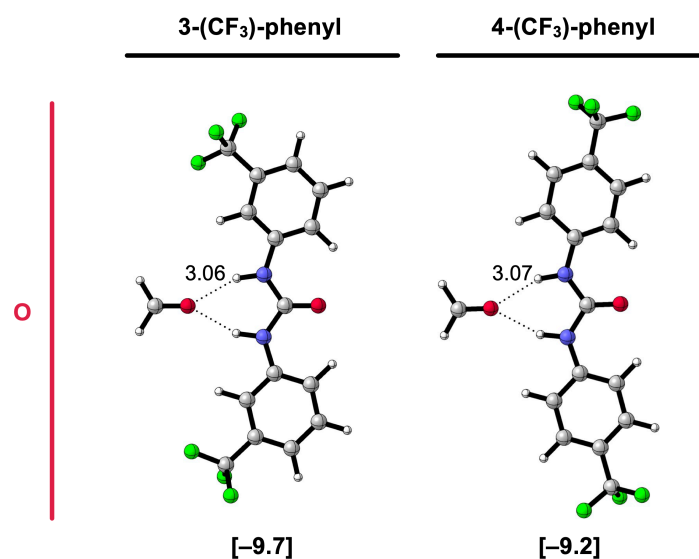

**Figure S4.** Equilibrium hydrogen-bonded complexes of formaldehyde with 1,3- $[n$ -(CF<sub>3</sub>)<sub>2</sub>phenyl]urea [ $X = O$ ;  $n = 3$  (*meta*) or 4 (*para*)]. The equilibrium hydrogen-bond (O $\cdots$ (H)N) distances (in Å) are indicated and the hydrogen-bond energies  $\Delta E$  (in kcal mol<sup>-1</sup>) are shown below the structures between square brackets. Color code of the ball-and-stick structures: H = white; C = grey; N = blue; O = pink; F = green.

**Table S8.** Decomposition of the hydrogen-bond energy  $\Delta E$  (in kcal mol<sup>-1</sup>) of the formaldehyde–1,3- $[n$ -(CF<sub>3</sub>)<sub>2</sub>phenyl]urea [ $X = O$ ;  $n = 3$  (*meta*) or 4 (*para*)] complexes.<sup>[a,b,c]</sup>

| R <sup>1</sup>                                    | R <sup>3</sup>                                    | X | $\Delta E$ | $\Delta E_{\text{strain}}$ | $\Delta E_{\text{int}}$ | $\Delta V_{\text{elstat}}$ | $\Delta E_{\text{Pauli}}$ | $\Delta E_{\text{oi}}$ | $\Delta E_{\text{disp}}$ |
|---------------------------------------------------|---------------------------------------------------|---|------------|----------------------------|-------------------------|----------------------------|---------------------------|------------------------|--------------------------|
| 3-(CF <sub>3</sub> )C <sub>6</sub> H <sub>4</sub> | 3-(CF <sub>3</sub> )C <sub>6</sub> H <sub>4</sub> | O | -9.7       | 0.2                        | -9.9                    | -11.3                      | 9.6                       | -5.4                   | -2.7                     |
| 4-(CF <sub>3</sub> )C <sub>6</sub> H <sub>4</sub> | 4-(CF <sub>3</sub> )C <sub>6</sub> H <sub>4</sub> | O | -9.2       | 0.1                        | -9.3                    | -10.8                      | 9.2                       | -5.1                   | -2.6                     |

[a] All computed at ZORA-BLYP-D3(BJ)/TZ2P in C<sub>1</sub> symmetry. [b]  $\Delta E = \Delta E_{\text{strain}} + \Delta E_{\text{int}}$ ;  $\Delta E_{\text{int}} = \Delta V_{\text{elstat}} + \Delta E_{\text{Pauli}} + \Delta E_{\text{oi}} + \Delta E_{\text{disp}}$  (see Method S2 for details). [c] See Figure S4 for the corresponding structures.

## Data S6. Cartesian coordinates and energies of optimized monomers

---

Below is a list consisting of the Cartesian coordinates (in Å), ADF total bond energies  $E$ , enthalpies  $H$ , Gibbs free energies  $G$  (in kcal mol<sup>-1</sup>), and the number of imaginary frequencies ( $N_{\text{imag}}$ ) of all optimized monomers reported in this work, optimized at the ZORA-BLYP-D3(BJ)/TZ2P level.

### Formaldehyde

$E$ : -494.36

$H$ : -475.92

$G$ : -491.92

$N_{\text{imag}} = 0$

|   |             |             |             |
|---|-------------|-------------|-------------|
| H | 1.17359952  | 0.94518045  | -0.00137433 |
| H | 1.17359952  | -0.94518045 | -0.00137433 |
| C | 0.58285140  | 0.00000000  | -0.00078141 |
| O | -0.62895043 | 0.00000000  | 0.00043007  |

### Urea

$E$ : -1059.79

$H$ : -1017.84

$G$ : -1037.83

$N_{\text{imag}} = 0$

|   |             |             |             |
|---|-------------|-------------|-------------|
| N | 1.19058131  | -0.51423267 | -0.20589918 |
| N | -1.10856075 | -0.57298645 | 0.23787953  |
| C | 0.01965806  | 0.21608292  | 0.00597078  |
| O | -0.01479062 | 1.44263088  | -0.01017708 |
| H | 2.03030398  | 0.05252568  | -0.15736625 |
| H | -1.97879583 | -0.05584540 | 0.17508885  |
| H | 1.27162565  | -1.42924204 | 0.22558231  |
| H | -1.13771448 | -1.50223177 | -0.16910903 |

### Thiourea

$E$ : -981.33

$H$ : -940.56

$G$ : -961.48

$N_{\text{imag}} = 0$

|   |             |             |             |
|---|-------------|-------------|-------------|
| N | 1.18058694  | -0.48209422 | -0.17255048 |
| N | -1.10037175 | -0.54121322 | 0.20366322  |
| C | 0.01918647  | 0.23320458  | 0.00580741  |
| S | -0.02789530 | 1.90661262  | -0.01635258 |
| H | 2.03215443  | 0.06588172  | -0.16253884 |
| H | -1.98139857 | -0.04246125 | 0.17984260  |
| H | 1.25089122  | -1.42476688 | 0.19942532  |
| H | -1.11725683 | -1.49590631 | -0.14306214 |

## Selenourea

*E*: -960.00

*H*: -919.61

*G*: -941.61

*N*<sub>imag</sub> = 0

|    |             |             |             |
|----|-------------|-------------|-------------|
| N  | 1.18308681  | -0.47556264 | -0.14830592 |
| N  | -1.10327084 | -0.53548190 | 0.17917930  |
| C  | 0.01949367  | 0.22112692  | 0.00591295  |
| Se | -0.03210354 | 2.06244690  | -0.01833854 |
| H  | 2.03530979  | 0.07029821  | -0.15012574 |
| H  | -1.98490549 | -0.03868044 | 0.16719893  |
| H  | 1.25510632  | -1.44235687 | 0.15519136  |
| H  | -1.12048046 | -1.51259614 | -0.09820320 |

## 1-Cyclohexylurea

*E*: -3083.77

*H*: -2946.20

*G*: -2975.80

*N*<sub>imag</sub> = 0

|   |             |            |              |
|---|-------------|------------|--------------|
| N | 8.23146854  | 6.13271249 | -14.31365898 |
| N | 10.03288949 | 4.86140649 | -13.52989913 |
| C | 9.34282615  | 5.37353498 | -14.64077448 |
| H | 4.56513732  | 5.07251824 | -17.00449070 |
| O | 9.70001496  | 5.14557105 | -15.79660773 |
| H | 5.81742183  | 6.08331274 | -17.72290031 |
| H | 3.90175003  | 6.91551309 | -15.46954316 |
| H | 10.95279432 | 4.51066520 | -13.77681244 |
| H | 7.84907784  | 6.00952246 | -13.38069314 |
| H | 10.02035813 | 5.41073956 | -12.67550539 |
| H | 3.85204588  | 7.49109724 | -17.13670227 |
| C | 7.27308715  | 6.54444426 | -15.35011753 |
| C | 5.51482183  | 8.27549243 | -15.96938790 |
| C | 6.52831832  | 7.81446984 | -14.90307402 |
| C | 6.28437396  | 5.41639786 | -15.71573367 |
| C | 5.27715937  | 5.87875579 | -16.78638088 |
| C | 4.52960063  | 7.15084143 | -16.34285317 |
| H | 7.87680383  | 6.77320882 | -16.23606782 |
| H | 6.06240918  | 8.58940980 | -16.87073187 |
| H | 4.97035361  | 9.15765041 | -15.60881060 |
| H | 5.99297942  | 7.60375385 | -13.96258059 |
| H | 7.25489196  | 8.60807972 | -14.68852301 |
| H | 5.74119649  | 5.11626054 | -14.80537702 |
| H | 6.85009169  | 4.54462163 | -16.06307237 |

## 1-Cyclohexylthiourea

*E*: -3006.43

*H*: -2870.05

*G*: -2900.37

*N*<sub>imag</sub> = 0

|   |             |            |              |
|---|-------------|------------|--------------|
| N | 8.22872046  | 6.05720767 | -14.37802963 |
| N | 10.05384571 | 4.93469487 | -13.52208257 |
| C | 9.37498153  | 5.37077167 | -14.64916197 |
| H | 4.51225551  | 5.09968755 | -17.01779367 |
| S | 9.94551285  | 5.02990762 | -16.19447427 |
| H | 5.76992839  | 6.10093544 | -17.74031108 |
| H | 3.90142656  | 6.92933686 | -15.44540894 |
| H | 10.98516398 | 4.58276233 | -13.71271600 |
| H | 7.88370471  | 6.02944666 | -13.42200312 |
| H | 9.96302611  | 5.47073021 | -12.66222879 |
| H | 3.83549278  | 7.53125568 | -17.10257450 |
| C | 7.26437532  | 6.50577876 | -15.39163534 |

|   |            |            |              |
|---|------------|------------|--------------|
| C | 5.52741898 | 8.27214202 | -15.95039586 |
| C | 6.55112998 | 7.78009615 | -14.90769513 |
| C | 6.25500859 | 5.39610410 | -15.75167216 |
| C | 5.23995308 | 5.89145968 | -16.79925903 |
| C | 4.51948827 | 7.16805440 | -16.32473702 |
| H | 7.85897659 | 6.73510667 | -16.28359111 |
| H | 6.06576310 | 8.59167795 | -16.85501193 |
| H | 5.00293039 | 9.15651601 | -15.56683664 |
| H | 6.02822815 | 7.56456055 | -13.96113451 |
| H | 7.29426268 | 8.55946298 | -14.69684818 |
| H | 5.72282276 | 5.09095489 | -14.83691370 |
| H | 6.80543455 | 4.52412212 | -16.12134939 |

### 1-Cyclohexylselenourea

**E:** -2985.75

**H:** -2849.72

**G:** -2881.02

$N_{imag} = 0$

|    |             |            |              |
|----|-------------|------------|--------------|
| N  | 8.22088023  | 6.04199606 | -14.37863517 |
| N  | 10.06859418 | 4.95316075 | -13.53356372 |
| C  | 9.37669739  | 5.38637301 | -14.63968082 |
| H  | 4.50029699  | 5.10178613 | -17.01327532 |
| Se | 10.02611144 | 5.03547053 | -16.33844884 |
| H  | 5.76432739  | 6.09396365 | -17.73741190 |
| H  | 3.89894518  | 6.93871757 | -15.44546561 |
| H  | 11.00132522 | 4.60445613 | -13.72064374 |
| H  | 7.88583672  | 6.04572627 | -13.41770490 |
| H  | 9.93586017  | 5.42123554 | -12.63992591 |
| H  | 3.83729370  | 7.53702655 | -17.10405246 |
| C  | 7.25731168  | 6.49728107 | -15.39150538 |
| C  | 5.53255719  | 8.27136396 | -15.95313042 |
| C  | 6.55330223  | 7.77645686 | -14.90867114 |
| C  | 6.24380619  | 5.39123713 | -15.74738417 |
| C  | 5.23221559  | 5.89004057 | -16.79646933 |
| C  | 4.51880647  | 7.17178388 | -16.32505225 |
| H  | 7.85450280  | 6.72009358 | -16.28381122 |
| H  | 6.07342230  | 8.58540203 | -16.85804165 |
| H  | 5.01301813  | 9.15956472 | -15.57188416 |
| H  | 6.02926164  | 7.56673558 | -13.96133741 |
| H  | 7.30132479  | 8.55206785 | -14.70109740 |
| H  | 5.70998765  | 5.08950336 | -14.83248118 |
| H  | 6.79188500  | 4.51725699 | -16.11624676 |

### 1-Phenylurea

**E:** -2572.45

**H:** -2478.37

**G:** -2506.29

$N_{imag} = 0$

|   |             |             |             |
|---|-------------|-------------|-------------|
| N | 1.18494757  | -0.86116706 | -0.18403123 |
| N | -1.09429938 | -0.39563189 | -0.15025547 |
| C | 0.19384051  | 0.12756729  | -0.08840853 |
| C | -2.32956230 | 0.28864858  | -0.08678747 |
| C | -2.43955252 | 1.67043429  | 0.15002307  |
| C | -3.70749621 | 2.25616177  | 0.21089530  |
| C | -4.86927995 | 1.49705472  | 0.03953504  |
| C | -4.75510841 | 0.12237193  | -0.19754018 |
| C | -3.49806222 | -0.47797955 | -0.26029246 |
| O | 0.46628337  | 1.32147447  | -0.00756059 |
| H | -3.41718291 | -1.54912950 | -0.44402401 |
| H | -5.64565903 | -0.48696269 | -0.33472631 |
| H | -3.78113546 | 3.32613629  | 0.39382171  |
| H | 2.10853419  | -0.50252154 | 0.03490497  |



|   |             |             |             |
|---|-------------|-------------|-------------|
| H | 0.99535594  | -1.77876570 | 0.20732625  |
| H | -1.17005236 | -1.38441364 | -0.36146645 |
| H | -1.54245050 | 2.26230425  | 0.27442225  |
| H | -5.84826550 | 1.96719920  | 0.08843030  |

### 1-Phenylthiourea

**E:** -2492.34

**H:** -2400.07

**G:** -2427.07

$N_{imag} = 0$

|   |             |             |             |
|---|-------------|-------------|-------------|
| N | 1.14711257  | -0.89746257 | -0.10323254 |
| N | -1.07260590 | -0.33905566 | -0.05767201 |
| C | 0.21430901  | 0.12569699  | -0.21617699 |
| C | -2.31973878 | 0.33327965  | -0.04365836 |
| C | -2.47303444 | 1.68702371  | 0.29501868  |
| C | -3.75313153 | 2.24699525  | 0.32152200  |
| C | -4.88556943 | 1.48210348  | 0.02408534  |
| C | -4.73025614 | 0.13033388  | -0.30287565 |
| C | -3.45803623 | -0.44005996 | -0.33825500 |
| S | 0.69133046  | 1.68626119  | -0.58334999 |
| H | -3.34111942 | -1.49097450 | -0.60145335 |
| H | -5.59815010 | -0.48193562 | -0.53665291 |
| H | -3.86067127 | 3.29755954  | 0.58229009  |
| H | 2.10851262  | -0.57584932 | -0.10774049 |
| H | 0.95431143  | -1.66414431 | 0.53709373  |
| H | -1.16627425 | -1.34980779 | -0.10950201 |
| H | -1.60154246 | 2.28820975  | 0.51786875  |
| H | -5.87528187 | 1.93136208  | 0.04699812  |

### 1-Phenylselenourea

**E:** -2470.96

**H:** -2379.07

**G:** -2406.96

$N_{imag} = 0$

|    |             |             |             |
|----|-------------|-------------|-------------|
| N  | -5.28782393 | -1.21310921 | 0.45076443  |
| N  | -3.28803396 | -0.29198378 | -0.16730199 |
| C  | -4.17578006 | -0.50620865 | 0.85348627  |
| C  | -2.06445354 | 0.42613630  | -0.21075575 |
| C  | -1.79931619 | 1.54466257  | 0.59301808  |
| C  | -0.58257256 | 2.21663647  | 0.45250328  |
| C  | 0.37003403  | 1.79879904  | -0.48293461 |
| C  | 0.09542071  | 0.69150803  | -1.29294584 |
| C  | -1.11321525 | 0.00733200  | -1.15720448 |
| Se | -3.98126321 | -0.04175505 | 2.62446292  |
| H  | -1.32003136 | -0.86191021 | -1.78059026 |
| H  | 0.82322432  | 0.35318938  | -2.02674035 |
| H  | -0.38325877 | 3.08083271  | 1.08220975  |
| H  | -6.00525793 | -1.31605224 | 1.15903112  |
| H  | -5.61706379 | -1.13013632 | -0.50844375 |
| H  | -3.44482973 | -0.86037266 | -0.99646557 |
| H  | -2.53034639 | 1.86859157  | 1.32265510  |
| H  | 1.31358092  | 2.32981925  | -0.58150769 |

### 1-[3-(trifluoromethyl)phenyl]urea

Global minimum conformer

**E:** -2967.31

**H:** -2869.10

**G:** -2901.48

$N_{imag} = 0$

|   |             |             |             |
|---|-------------|-------------|-------------|
| N | -0.98601782 | 0.21674962  | 0.23102304  |
| N | -3.17670547 | -0.41161402 | 0.69660829  |
| C | -2.26612757 | 0.64364133  | 0.58822818  |
| C | 3.82915065  | 0.25280447  | -0.72873758 |
| O | -2.57236914 | 1.80611255  | 0.83192370  |
| F | 4.66843045  | 0.91782394  | -1.58271190 |
| F | 3.60886003  | -0.98928037 | -1.26961455 |
| H | -4.13596992 | -0.09578145 | 0.79116970  |
| H | -0.83571663 | -0.78538409 | 0.19479727  |
| H | -3.05949827 | -1.23054669 | 0.10866172  |
| F | 4.53921100  | 0.04839524  | 0.43425881  |
| H | 1.36623339  | -0.77916706 | -0.30774427 |
| C | 0.17268321  | 0.99546288  | 0.03489726  |
| C | 0.18607554  | 2.40101633  | 0.09806311  |
| C | 1.38204254  | 3.08648966  | -0.12753432 |
| C | 2.56930269  | 2.41005807  | -0.41342980 |
| C | 2.54850445  | 1.01085963  | -0.47538466 |
| C | 1.36495570  | 0.30671354  | -0.25167151 |
| H | -0.72929399 | 2.93110130  | 0.32501760  |
| H | 1.38214949  | 4.17273608  | -0.07825394 |
| H | 3.49196042  | 2.95343782  | -0.59028419 |

#### Local minimum conformer

**E:** -2966.90

**H:** -2868.71

**G:** -2901.04

$N_{imag} = 0$

|   |             |             |             |
|---|-------------|-------------|-------------|
| N | -0.98601782 | 0.21674962  | 0.23102304  |
| N | -3.17670547 | -0.41161402 | 0.69660829  |
| C | -2.26612757 | 0.64364133  | 0.58822818  |
| C | 3.82915065  | 0.25280447  | -0.72873758 |
| O | -2.57236914 | 1.80611255  | 0.83192370  |
| F | 4.66843045  | 0.91782394  | -1.58271190 |
| F | 3.60886003  | -0.98928037 | -1.26961455 |
| H | -4.13596992 | -0.09578145 | 0.79116970  |
| H | -0.83571663 | -0.78538409 | 0.19479727  |
| H | -3.05949827 | -1.23054669 | 0.10866172  |
| F | 4.53921100  | 0.04839524  | 0.43425881  |
| H | 1.36623339  | -0.77916706 | -0.30774427 |
| C | 0.17268321  | 0.99546288  | 0.03489726  |
| C | 0.18607554  | 2.40101633  | 0.09806311  |
| C | 1.38204254  | 3.08648966  | -0.12753432 |
| C | 2.56930269  | 2.41005807  | -0.41342980 |
| C | 2.54850445  | 1.01085963  | -0.47538466 |
| C | 1.36495570  | 0.30671354  | -0.25167151 |
| H | -0.72929399 | 2.93110130  | 0.32501760  |
| H | 1.38214949  | 4.17273608  | -0.07825394 |
| H | 3.49196042  | 2.95343782  | -0.59028419 |

#### 1-[3-(trifluoromethyl)phenyl]thiourea

##### Global minimum conformer

**E:** -2886.85

**H:** -2790.46

**G:** -2821.73

$N_{imag} = 0$

|   |             |             |             |
|---|-------------|-------------|-------------|
| N | -0.96071793 | 0.18997918  | 0.15412652  |
| N | -3.12466787 | -0.38283818 | 0.62882461  |
| C | -2.16223795 | 0.61172432  | 0.68866322  |
| F | 4.55940233  | -0.35473008 | 0.56060975  |
| S | -2.48729674 | 2.08273711  | 1.41283961  |
| F | 4.74878836  | 0.24424925  | -1.54766542 |
| F | 3.54930124  | -1.52432478 | -1.00736022 |
| H | -4.04872127 | -0.08573811 | 0.92048649  |
| H | -0.89271996 | -0.81327004 | 0.00608075  |
| H | -3.10336679 | -1.04988925 | -0.13845130 |
| H | 1.74044932  | 3.90430420  | -0.41581909 |
| H | -0.47465718 | 2.88801711  | 0.02283802  |

|   |            |             |             |
|---|------------|-------------|-------------|
| C | 0.26544818 | 0.86353314  | -0.04488884 |
| C | 1.40104245 | 0.05463559  | -0.22665017 |
| C | 2.64544725 | 0.63320631  | -0.47669312 |
| C | 2.78284076 | 2.02601344  | -0.53899180 |
| C | 1.65046902 | 2.82223005  | -0.36077658 |
| C | 0.39470548 | 2.26012194  | -0.11914120 |
| H | 1.31145612 | -1.02779478 | -0.17596421 |
| C | 3.86454691 | -0.24561013 | -0.62286695 |
| H | 3.75314866 | 2.47303518  | -0.73112589 |

**Local minimum conformer**

**E:** -2886.54

**H:** -2789.60

**G:** -2822.86

$N_{imag} = 0$

|   |             |             |             |
|---|-------------|-------------|-------------|
| N | 1.15093403  | -0.90731841 | -0.03967222 |
| N | -1.07806389 | -0.38234696 | 0.00062154  |
| C | 0.20370661  | 0.08479354  | -0.22901987 |
| C | -2.31679158 | 0.29819517  | -0.04009061 |
| C | -2.45337483 | 1.65172967  | 0.30397091  |
| C | -3.72188585 | 2.23607133  | 0.28390889  |
| C | -4.86039717 | 1.49872223  | -0.06735822 |
| C | -4.71730755 | 0.14919322  | -0.39331912 |
| C | -3.45657001 | -0.44835708 | -0.38351101 |
| F | -2.82178528 | 4.19609806  | 1.33611177  |
| C | -3.87000040 | 3.70536909  | 0.60894090  |
| H | 2.10987499  | -0.58516558 | -0.10249559 |
| H | 0.97833544  | -1.62817785 | 0.65658504  |
| H | -3.35144256 | -1.49902423 | -0.64997193 |
| H | -1.17023012 | -1.39443939 | -0.00033726 |
| H | -1.58374416 | 2.23306081  | 0.57659235  |
| H | -5.83787240 | 1.97060888  | -0.07735924 |
| S | 0.63115527  | 1.61208225  | -0.75002971 |
| F | -3.95393538 | 4.47007387  | -0.53200335 |
| F | -5.01214293 | 3.95936211  | 1.32849216  |
| H | -5.58966187 | -0.44048841 | -0.66302472 |

**1-[3-(trifluoromethyl)phenyl]selenourea**

**Global minimum conformer**

**E:** -2865.41

**H:** -2768.83

**G:** -2802.83

$N_{imag} = 0$

|    |             |             |             |
|----|-------------|-------------|-------------|
| N  | -0.97390169 | 0.17540627  | 0.00946081  |
| N  | -3.19844933 | -0.29675909 | 0.24918146  |
| C  | -2.20686559 | 0.64194098  | 0.39646532  |
| F  | 4.33885539  | -0.16708317 | 1.59000799  |
| Se | -2.59278538 | 2.28269782  | 1.13313402  |
| F  | 4.97978398  | 0.12586291  | -0.49402451 |
| F  | 3.68717017  | -1.58031401 | 0.03297850  |
| H  | -4.13648747 | 0.02607227  | 0.45435371  |
| H  | -0.90687478 | -0.83511092 | -0.08753078 |
| H  | -3.11318916 | -1.02835925 | -0.45213386 |
| H  | 1.80476114  | 3.80740800  | -0.65177209 |
| H  | -0.45694013 | 2.80597897  | -0.49302136 |
| C  | 0.28131041  | 0.82865324  | -0.05197539 |
| C  | 1.42319460  | 0.03466129  | 0.13341738  |
| C  | 2.69532842  | 0.60230958  | 0.03331404  |
| C  | 2.84399370  | 1.96803207  | -0.23799060 |
| C  | 1.70158141  | 2.74890778  | -0.42656974 |
| C  | 0.42315903  | 2.19388125  | -0.34374193 |
| H  | 1.31983363  | -1.02420830 | 0.35681986  |

|   |            |             |             |
|---|------------|-------------|-------------|
| C | 3.91593706 | -0.25051427 | 0.28266662  |
| H | 3.83429035 | 2.40658344  | -0.31071060 |

**Local minimum conformer**

**E:** -2865.14

**H:** -2768.60

**G:** -2802.71

**N<sub>imag</sub>** = 0

|    |             |             |             |
|----|-------------|-------------|-------------|
| N  | 1.15397308  | -0.87471012 | -0.00058249 |
| N  | -1.08330188 | -0.39369899 | 0.05648966  |
| C  | 0.17864281  | 0.06018003  | -0.24837569 |
| C  | -2.32476603 | 0.28618686  | -0.01488818 |
| C  | -2.45710015 | 1.63424093  | 0.34768521  |
| C  | -3.71676946 | 2.23344604  | 0.29382836  |
| C  | -4.84924542 | 1.51133395  | -0.10872067 |
| C  | -4.71032554 | 0.16559336  | -0.44880844 |
| C  | -3.45524917 | -0.44597644 | -0.40627957 |
| F  | -2.81462875 | 4.17839597  | 1.37080776  |
| C  | -3.86585889 | 3.69679050  | 0.64230426  |
| H  | 2.10526195  | -0.55536075 | -0.14043295 |
| H  | 1.01489969  | -1.57594775 | 0.72302409  |
| H  | -3.34866117 | -1.49206723 | -0.68854279 |
| H  | -1.17322521 | -1.40295510 | 0.14633151  |
| H  | -1.59051560 | 2.19928116  | 0.66276260  |
| H  | -5.82105744 | 1.99384438  | -0.14566347 |
| Se | 0.60746131  | 1.68354122  | -0.99452668 |
| F  | -3.96004381 | 4.47894976  | -0.48536107 |
| F  | -5.00470363 | 3.93567366  | 1.37330285  |
| H  | -5.57921057 | -0.40987768 | -0.75735461 |

**1-[3,5-bis(trifluoromethyl)phenyl]urea**

**E:** -3360.34

**H:** -3258.05

**G:** -3294.75

**N<sub>imag</sub>** = 0

|   |             |             |             |
|---|-------------|-------------|-------------|
| N | 1.18104315  | -0.84083017 | -0.17069363 |
| N | -1.10635984 | -0.41665849 | -0.14585107 |
| C | 0.18229727  | 0.12647749  | -0.07121059 |
| C | -2.33620403 | 0.26149402  | -0.08137036 |
| C | -2.44800600 | 1.63543085  | 0.19125432  |
| C | -3.71720012 | 2.21895181  | 0.25235560  |
| C | -4.88059489 | 1.47545301  | 0.04509787  |
| C | -4.75676284 | 0.10890011  | -0.22754961 |
| C | -3.50328621 | -0.49658041 | -0.28961787 |
| C | -6.00168361 | -0.73239304 | -0.39797946 |
| C | -3.81180818 | 3.71066503  | 0.49906452  |
| H | 2.10688862  | -0.48233659 | 0.03655775  |
| H | 1.00397223  | -1.78224798 | 0.16362183  |
| H | -3.43017542 | -1.55980967 | -0.50407039 |
| H | -1.17318713 | -1.40215554 | -0.37492524 |
| H | -1.55359284 | 2.22391986  | 0.34487237  |
| H | -5.85614208 | 1.94468573  | 0.09294555  |
| O | 0.42415404  | 1.32393897  | 0.02432491  |
| F | -7.01773437 | -0.03924918 | -0.99466793 |
| F | -6.48215675 | -1.17165465 | 0.81437873  |
| F | -5.77476619 | -1.85197665 | -1.15602837 |
| F | -2.89934093 | 4.13959556  | 1.42372952  |
| F | -5.04898052 | 4.08656703  | 0.94758709  |
| F | -3.57386303 | 4.42436977  | -0.65156998 |

### 1-[3,5-bis(trifluoromethyl)phenyl]thiourea

**E:** -3279.74

**H:** -3178.73

**G:** -3216.28

**N<sub>imag</sub>** = 0

|   |             |             |             |
|---|-------------|-------------|-------------|
| N | 1.14177741  | -0.88213372 | -0.05072534 |
| N | -1.09319474 | -0.39397766 | 0.06615654  |
| C | 0.17032402  | 0.07339743  | -0.26863864 |
| C | -2.33155767 | 0.28133747  | 0.02766360  |
| C | -2.45789874 | 1.64697259  | 0.32885009  |
| C | -3.72250791 | 2.23683311  | 0.31089826  |
| C | -4.87107341 | 1.49657445  | 0.00912685  |
| C | -4.73544919 | 0.13600672  | -0.27213813 |
| C | -3.47690168 | -0.47116617 | -0.26793991 |
| C | -5.95911732 | -0.71111290 | -0.53854124 |
| C | -3.85218356 | 3.72059388  | 0.58427249  |
| H | 2.09269227  | -0.56460110 | -0.19761303 |
| H | 1.01267457  | -1.57139754 | 0.68512391  |
| H | -3.38645888 | -1.52765476 | -0.50795428 |
| H | -1.17664241 | -1.40533317 | 0.12252196  |
| H | -1.58158402 | 2.23242170  | 0.57015044  |
| H | -5.84686595 | 1.96826591  | -0.00085044 |
| S | 0.52938978  | 1.56146725  | -0.93099415 |
| F | -7.01548359 | 0.02426603  | -0.99334616 |
| F | -6.38311373 | -1.35325363 | 0.60329323  |
| F | -5.71548410 | -1.69158862 | -1.46612038 |
| F | -2.84276389 | 4.19526112  | 1.37442278  |
| F | -5.03316026 | 4.02560977  | 1.20894886  |
| F | -3.82341006 | 4.44897153  | -0.57999776 |

### 1-[3,5-bis(trifluoromethyl)phenyl]selenourea

**E:** -3258.31

**H:** -3157.69

**G:** -3196.02

**N<sub>imag</sub>** = 0

|    |             |             |             |
|----|-------------|-------------|-------------|
| N  | 1.14254632  | -0.86615821 | -0.02684356 |
| N  | -1.09348564 | -0.39440086 | 0.09232798  |
| C  | 0.16011654  | 0.06003906  | -0.25867270 |
| C  | -2.33495797 | 0.27970219  | 0.04684137  |
| C  | -2.45989720 | 1.64387347  | 0.35232387  |
| C  | -3.72221990 | 2.23731881  | 0.31923037  |
| C  | -4.86830420 | 1.49946583  | 0.00015550  |
| C  | -4.73370869 | 0.13922143  | -0.28079890 |
| C  | -3.47571573 | -0.47119842 | -0.26292424 |
| C  | -5.95510973 | -0.70572629 | -0.56258007 |
| C  | -3.85561503 | 3.71987500  | 0.59591558  |
| H  | 2.09033092  | -0.55893733 | -0.20922696 |
| H  | 1.02200155  | -1.58338154 | 0.68370842  |
| H  | -3.38356201 | -1.52698039 | -0.50523154 |
| H  | -1.17802303 | -1.40274355 | 0.19700903  |
| H  | -1.58434492 | 2.22440101  | 0.60869670  |
| H  | -5.84284935 | 1.97363148  | -0.02136446 |
| Se | 0.55709829  | 1.67367894  | -1.04052413 |
| F  | -7.01246146 | 0.03395247  | -1.00728671 |
| F  | -6.37903052 | -1.36719448 | 0.56844510  |
| F  | -5.70737857 | -1.67113832 | -1.50490045 |
| F  | -2.82988647 | 4.20292733  | 1.35854156  |
| F  | -5.02271529 | 4.01488481  | 1.25193380  |
| F  | -3.86526838 | 4.44779574  | -0.56880436 |

### 1,3-Dicyclohexylurea

*E*: -5107.43

*H*: -4874.29

*G*: -4913.45

*N*<sub>imag</sub> = 0

|   |             |             |             |
|---|-------------|-------------|-------------|
| N | 2.94169612  | -0.64143172 | 0.53965770  |
| N | 0.71154619  | -0.19633054 | 0.00255798  |
| C | 1.88750428  | 0.26799830  | 0.58777661  |
| H | 5.11020146  | -2.24427355 | 0.69878214  |
| H | 5.09322336  | -0.88523446 | 4.68071369  |
| H | 5.47902902  | -0.84280471 | -0.31437620 |
| H | 3.67241308  | -1.86181948 | 2.87796595  |
| O | 1.98648287  | 1.38521433  | 1.10279357  |
| H | 5.46994137  | 0.50494268  | 3.66487019  |
| H | 6.26340362  | -2.40869504 | 3.09884148  |
| H | 3.12731454  | -0.21535358 | 3.24007324  |
| H | -3.83128286 | 0.32075955  | -0.74342293 |
| H | 2.69044271  | -1.61705291 | 0.40520752  |
| H | 0.80954738  | -0.95751157 | -0.66384666 |
| H | 7.35759139  | -1.11348102 | 3.58734056  |
| C | 4.15170879  | -0.41308169 | 1.34316398  |
| C | 6.63194825  | -0.94700726 | 1.54038805  |
| C | 5.34228055  | -1.16672603 | 0.72485992  |
| C | 3.95738932  | -0.79864241 | 2.82588711  |
| C | 5.24612600  | -0.57216249 | 3.63982215  |
| C | 6.44037586  | -1.32464110 | 3.02222307  |
| H | 4.34179777  | 0.66519032  | 1.29102924  |
| H | 6.92128613  | 0.11254655  | 1.47294603  |
| H | 7.45430814  | -1.52627234 | 1.10100021  |
| C | -2.66791199 | 1.75256859  | -1.90803028 |
| H | -1.64792787 | -0.78369613 | -1.17315790 |
| H | -1.15988928 | 3.08978367  | -2.74249970 |
| H | -1.88166114 | -0.59928476 | 0.56981338  |
| H | -0.02213416 | 0.89712753  | -2.39627742 |
| H | -1.40357279 | 3.26569153  | -1.00581102 |
| H | -2.64280905 | 1.09176663  | -2.78841355 |
| H | 0.77676426  | 2.14322103  | -1.42254630 |
| H | -3.50402060 | 2.44790677  | -2.05855681 |
| C | -0.39448103 | 0.73332785  | -0.27060405 |
| C | -2.90596833 | 0.90290486  | -0.64452661 |
| C | -1.72084360 | -0.04146986 | -0.36110525 |
| C | -0.15496388 | 1.57864772  | -1.54060779 |
| C | -1.33836787 | 2.52591665  | -1.81781311 |
| H | -0.43098382 | 1.41045531  | 0.59060872  |
| H | -3.04463364 | 1.57138458  | 0.21850596  |

### 1,3-Dicyclohexylthiourea

*E*: -5030.67

*H*: -4798.75

*G*: -4838.59

*N*<sub>imag</sub> = 0

|   |            |             |             |
|---|------------|-------------|-------------|
| N | 2.92201346 | -0.48767717 | 0.66657360  |
| N | 0.76994553 | -0.00402649 | 0.01750933  |
| C | 1.90093920 | 0.43011076  | 0.66347672  |
| H | 5.01315831 | -2.19282221 | 0.66723876  |
| H | 5.18131009 | -1.02637942 | 4.70905342  |
| H | 5.41753074 | -0.75874879 | -0.28811218 |
| H | 3.66107000 | -1.85158496 | 2.91045551  |
| S | 2.02477712 | 1.95169072  | 1.38691141  |
| H | 5.58969713 | 0.39209357  | 3.74582231  |
| H | 6.22977992 | -2.52484002 | 3.02126422  |
| H | 3.20576964 | -0.19893599 | 3.36397033  |

|   |             |             |             |
|---|-------------|-------------|-------------|
| H | -3.78408171 | 0.16992100  | -0.78415219 |
| H | 2.69041789  | -1.43734000 | 0.38525707  |
| H | 0.85596447  | -0.84306723 | -0.55103864 |
| H | 7.39801093  | -1.30505888 | 3.53177830  |
| C | 4.16642940  | -0.35070928 | 1.43449822  |
| C | 6.61885277  | -1.00899965 | 1.52039118  |
| C | 5.29596212  | -1.12921432 | 0.73756652  |
| C | 3.99419661  | -0.80156723 | 2.90008102  |
| C | 5.31667429  | -0.67162081 | 3.67931759  |
| C | 6.45469233  | -1.44746503 | 2.98870937  |
| H | 4.40353535  | 0.71919338  | 1.42835740  |
| H | 6.95574581  | 0.03792241  | 1.49192020  |
| H | 7.39801882  | -1.60432180 | 1.02732160  |
| C | -2.70836341 | 1.65275152  | -1.96970521 |
| H | -1.52608816 | -0.79081510 | -1.16151998 |
| H | -1.28599373 | 3.07131358  | -2.81992476 |
| H | -1.79372886 | -0.57767784 | 0.57506174  |
| H | -0.00379873 | 0.97027816  | -2.41006616 |
| H | -1.56034887 | 3.26948136  | -1.09013593 |
| H | -2.62768171 | 0.97538361  | -2.83402756 |
| H | 0.69510907  | 2.29068261  | -1.45499703 |
| H | -3.58870366 | 2.28476714  | -2.14467944 |
| C | -0.39502310 | 0.83753060  | -0.28499569 |
| C | -2.90328288 | 0.81782671  | -0.68905636 |
| C | -1.65941202 | -0.03529988 | -0.36929577 |
| C | -0.19391584 | 1.66177343  | -1.57382533 |
| C | -1.43636513 | 2.51800765  | -1.88409480 |
| H | -0.48707059 | 1.53200424  | 0.55772289  |
| H | -3.09839158 | 1.49411194  | 0.15646013  |

### 1,3-Dicyclohexylselenourea

**E:** -5010.40

**H:** -4778.80

**G:** -4819.57

$N_{imag} = 0$

|    |             |             |             |
|----|-------------|-------------|-------------|
| N  | 2.91298434  | -0.48487047 | 0.69239822  |
| N  | 0.78267925  | 0.01669731  | -0.00048797 |
| C  | 1.90100497  | 0.42787181  | 0.66156772  |
| H  | 5.01326834  | -2.18141914 | 0.66066838  |
| H  | 5.19100071  | -1.05896682 | 4.71573532  |
| H  | 5.40691458  | -0.73295300 | -0.27879897 |
| H  | 3.66718721  | -1.87277744 | 2.91474816  |
| Se | 2.03590427  | 2.10430280  | 1.46084376  |
| H  | 5.58687958  | 0.37237165  | 3.76629408  |
| H  | 6.24124113  | -2.53308138 | 3.00759715  |
| H  | 3.20626016  | -0.22589789 | 3.38642077  |
| H  | -3.77833719 | 0.16659408  | -0.76816298 |
| H  | 2.70987559  | -1.42241539 | 0.35189097  |
| H  | 0.83997762  | -0.85569795 | -0.52184824 |
| H  | 7.40456383  | -1.31220639 | 3.52652261  |
| C  | 4.16217131  | -0.35217241 | 1.45486727  |
| C  | 6.61608538  | -0.99880741 | 1.52179239  |
| C  | 5.29075082  | -1.11713193 | 0.74255158  |
| C  | 3.99554116  | -0.82129887 | 2.91449593  |
| C  | 5.32034887  | -0.69220699 | 3.68951040  |
| C  | 6.45982946  | -1.45412579 | 2.98585931  |
| H  | 4.39306566  | 0.71942254  | 1.46084575  |
| H  | 6.94706226  | 0.05010520  | 1.50325315  |
| H  | 7.39611701  | -1.58468974 | 1.01900750  |
| C  | -2.71614320 | 1.64455446  | -1.97214358 |
| H  | -1.52075968 | -0.79067786 | -1.15489297 |
| H  | -1.30450222 | 3.06121564  | -2.84321383 |
| H  | -1.77608630 | -0.56360019 | 0.58258387  |

|   |             |             |             |
|---|-------------|-------------|-------------|
| H | -0.01225871 | 0.96691458  | -2.42932316 |
| H | -1.56504776 | 3.27034952  | -1.11252097 |
| H | -2.64049161 | 0.96149938  | -2.83244356 |
| H | 0.68897326  | 2.29590388  | -1.48642462 |
| H | -3.59967514 | 2.27282160  | -2.14430297 |
| C | -0.38984173 | 0.85011394  | -0.30038182 |
| C | -2.89905863 | 0.81801061  | -0.68427890 |
| C | -1.65022575 | -0.02922282 | -0.36759414 |
| C | -0.19879616 | 1.66351725  | -1.59664678 |
| C | -1.44601643 | 2.51402613  | -1.90250038 |
| H | -0.47678959 | 1.55141927  | 0.53764573  |
| H | -3.08952186 | 1.49938015  | 0.15806215  |

### 1,3-Diphenylurea

**E:** -4085.03

**H:** -3938.84

**G:** -3974.97

$N_{imag} = 0$

|   |             |             |             |
|---|-------------|-------------|-------------|
| N | 0.86627103  | 1.13945697  | -0.45165770 |
| N | -1.21068196 | 0.14554469  | -0.67193359 |
| C | -0.39850712 | 0.96513550  | 0.11610078  |
| C | -2.54156078 | -0.26678900 | -0.43554385 |
| C | -3.13166213 | -1.10328361 | -1.40363959 |
| C | -4.44082268 | -1.55603354 | -1.24680899 |
| C | -5.18618316 | -1.18337008 | -0.12219772 |
| C | -4.59885715 | -0.35313107 | 0.83724605  |
| C | -3.28734225 | 0.11013136  | 0.69591208  |
| C | 1.95769988  | 1.89083000  | 0.03960543  |
| C | 3.13592658  | 1.88404589  | -0.73299065 |
| C | 4.25902586  | 2.59950169  | -0.32041820 |
| C | 4.22870456  | 3.33521287  | 0.86997618  |
| C | 3.05846932  | 3.34094087  | 1.63506969  |
| C | 1.92306489  | 2.62927602  | 1.23624968  |
| H | 3.02006846  | 3.90832427  | 2.56258496  |
| H | -2.55817451 | -1.39826693 | -2.28229807 |
| O | -0.75271150 | 1.47038422  | 1.17690315  |
| H | 1.05279281  | 0.66705086  | -1.32888302 |
| H | -2.83806888 | 0.75233899  | 1.44108792  |
| H | -0.81486165 | -0.21347043 | -1.53328129 |
| H | -4.87745333 | -2.20112322 | -2.00597439 |
| H | -6.20720354 | -1.53518087 | 0.00226406  |
| H | -5.16609972 | -0.05518680 | 1.71653010  |
| H | 3.16815910  | 1.31352377  | -1.66111021 |
| H | 5.15856405  | 2.58063886  | -0.93164307 |
| H | 5.10323626  | 3.89379986  | 1.19387185  |
| H | 1.02076833  | 2.63678137  | 1.83239640  |

### 1,3-Diphenylthiourea

**E:** -4003.03

**H:** -3858.19

**G:** -3894.89

$N_{imag} = 0$

|   |             |             |             |
|---|-------------|-------------|-------------|
| N | 0.80577305  | 1.20105324  | -0.39780870 |
| N | -1.19000653 | 0.12703447  | -0.55087866 |
| C | -0.42356425 | 0.99526525  | 0.21879062  |
| C | -2.55037124 | -0.24395133 | -0.41011562 |
| C | -2.90707111 | -1.55559809 | -0.76707387 |
| C | -4.24018880 | -1.96619192 | -0.70821331 |
| C | -5.23155610 | -1.07520267 | -0.28413613 |
| C | -4.87400891 | 0.23165994  | 0.06683778  |
| C | -3.54544399 | 0.65667556  | 0.00171917  |
| C | 1.95295747  | 1.88171081  | 0.08091728  |



|   |             |             |             |
|---|-------------|-------------|-------------|
| C | 2.73152053  | 2.58234785  | -0.85605090 |
| C | 3.90487337  | 3.22647722  | -0.45911808 |
| C | 4.31021164  | 3.18601045  | 0.87900533  |
| C | 3.53537954  | 2.48351903  | 1.80910165  |
| C | 2.36569377  | 1.82647257  | 1.42157359  |
| H | 3.84516231  | 2.43868476  | 2.85081752  |
| H | -2.13465968 | -2.25565119 | -1.08327927 |
| S | -0.90432764 | 1.68316016  | 1.65932012  |
| H | 0.80798065  | 1.05743155  | -1.40396821 |
| H | -3.27722904 | 1.66956193  | 0.27364522  |
| H | -0.65698368 | -0.49724169 | -1.15015288 |
| H | -4.49977262 | -2.98517621 | -0.98586301 |
| H | -6.26939135 | -1.39441694 | -0.22964021 |
| H | -5.63762259 | 0.93541668  | 0.39054040  |
| H | 2.40958355  | 2.62819199  | -1.89572647 |
| H | 4.49525241  | 3.76644768  | -1.19578970 |
| H | 5.21905559  | 3.69357759  | 1.19262302  |
| H | 1.77236345  | 1.28432187  | 2.14672201  |

### 1,3-Diphenylselenourea

**E:** -3981.41

**H:** -3836.94

**G:** -3874.46

**N<sub>imag</sub>** = 0

|    |             |             |             |
|----|-------------|-------------|-------------|
| N  | 0.80052530  | 1.21148778  | -0.41911726 |
| N  | -1.17827865 | 0.10971417  | -0.54753586 |
| C  | -0.42048485 | 0.99730963  | 0.19271303  |
| C  | -2.54266847 | -0.25610762 | -0.40932793 |
| C  | -2.88836136 | -1.59353439 | -0.66065254 |
| C  | -4.22310253 | -2.00015129 | -0.59557343 |
| C  | -5.22268503 | -1.07742684 | -0.27109645 |
| C  | -4.87442368 | 0.25641888  | -0.02709873 |
| C  | -3.54479072 | 0.67577107  | -0.10002549 |
| C  | 1.94950827  | 1.88933382  | 0.06628301  |
| C  | 2.68500652  | 2.66504665  | -0.84360776 |
| C  | 3.85524077  | 3.30912194  | -0.43458724 |
| C  | 4.29583121  | 3.19082992  | 0.88737952  |
| C  | 3.56258192  | 2.41120691  | 1.79000232  |
| C  | 2.39786192  | 1.75449822  | 1.38876081  |
| H  | 3.90195943  | 2.30579965  | 2.81796319  |
| H  | -2.10801722 | -2.31592357 | -0.89614717 |
| Se | -0.95620064 | 1.78008237  | 1.76406683  |
| H  | 0.81277964  | 1.05334630  | -1.42391392 |
| H  | -3.27988594 | 1.70881318  | 0.08776095  |
| H  | -0.64453057 | -0.52152360 | -1.14037711 |
| H  | -4.47708044 | -3.03970119 | -0.78927438 |
| H  | -6.26138874 | -1.39301498 | -0.21134925 |
| H  | -5.64546331 | 0.98356560  | 0.21736571  |
| H  | 2.33178007  | 2.77193900  | -1.86828417 |
| H  | 4.41422748  | 3.90998188  | -1.14814625 |
| H  | 5.20152817  | 3.69812560  | 1.21056604  |
| H  | 1.83443354  | 1.15051270  | 2.08916626  |

### 1,3-bis[3-(trifluoromethyl)phenyl]urea

**Global minimum conformer**

**E:** -4874.27

**H:** -4720.35

**G:** -4762.50

**N<sub>imag</sub>** = 0

|   |             |             |            |
|---|-------------|-------------|------------|
| N | 0.00890112  | 1.15686929  | 0.21307243 |
| N | -0.00890112 | -1.15686929 | 0.21307243 |
| C | 0.00000000  | -0.00000000 | 0.99695622 |

|   |             |             |             |
|---|-------------|-------------|-------------|
| C | -0.02970946 | -2.50164169 | 0.64047012  |
| C | -0.00955867 | -3.48574847 | -0.36443999 |
| C | -0.03730340 | -4.83831815 | -0.02569332 |
| C | -0.08070345 | -5.23695346 | 1.31654442  |
| C | -0.09954517 | -4.25474000 | 2.30779701  |
| C | -0.07438641 | -2.89437853 | 1.99046364  |
| C | 0.02970946  | 2.50164169  | 0.64047012  |
| C | 0.00955867  | 3.48574847  | -0.36443999 |
| C | 0.03730340  | 4.83831815  | -0.02569332 |
| C | 0.08070345  | 5.23695346  | 1.31654442  |
| C | 0.09954517  | 4.25474000  | 2.30779701  |
| C | 0.07438641  | 2.89437853  | 1.99046364  |
| F | 0.40223200  | 5.41401579  | -2.32586054 |
| H | 0.02105562  | -3.19480781 | -1.41171317 |
| O | 0.00000000  | 0.00000000  | 2.22322074  |
| H | -0.01888167 | 1.04122719  | -0.79375932 |
| H | -0.08975188 | -2.14031407 | 2.76534906  |
| H | 0.01888167  | -1.04122719 | -0.79375932 |
| C | 0.03806153  | -5.88266255 | -1.11399635 |
| H | -0.10483629 | -6.29070427 | 1.57532529  |
| F | 0.70545294  | 6.99415194  | -0.81951750 |
| H | -0.02105562 | 3.19480781  | -1.41171317 |
| C | -0.03806153 | 5.88266255  | -1.11399635 |
| H | 0.10483629  | 6.29070427  | 1.57532529  |
| H | 0.08975188  | 2.14031407  | 2.76534906  |
| F | -0.70545294 | -6.99415194 | -0.81951750 |
| F | -1.32967712 | 6.31816776  | -1.31126526 |
| H | 0.13666425  | 4.54875664  | 3.35391455  |
| H | -0.13666425 | -4.54875664 | 3.35391455  |
| F | 1.32967712  | -6.31816776 | -1.31126526 |
| F | -0.40223200 | -5.41401579 | -2.32586054 |

**Local minimum conformer**

**E:** -4873.44

**H:** -4719.50

**G:** -4761.99

**N<sub>imag</sub>** = 0

|   |             |             |             |
|---|-------------|-------------|-------------|
| N | 0.01766460  | 1.15730684  | 1.29451410  |
| C | 0.00000000  | 0.00000000  | 0.51028436  |
| H | 0.05939637  | 1.04175103  | 2.30068133  |
| C | 0.02868485  | 2.50196845  | 0.86710663  |
| N | -0.01766460 | -1.15730684 | 1.29451410  |
| O | 0.00000000  | 0.00000000  | -0.71649538 |
| C | 0.10102992  | 3.49258381  | 1.86581005  |
| C | -0.03657502 | 2.88680169  | -0.48219726 |
| H | -0.05939637 | -1.04175103 | 2.30068133  |
| C | -0.02868485 | -2.50196845 | 0.86710663  |
| C | 0.10816652  | 4.84293792  | 1.52500574  |
| H | 0.14993988  | 3.19902382  | 2.91377622  |
| C | -0.03003286 | 4.24848396  | -0.80268408 |
| H | -0.09363264 | 2.13278586  | -1.25448240 |
| C | -0.10102992 | -3.49258381 | 1.86581005  |
| C | 0.03657502  | -2.88680169 | -0.48219726 |
| C | 0.04414542  | 5.23584238  | 0.18549957  |
| H | 0.16250563  | 5.59384380  | 2.30910493  |
| C | -0.04554718 | 4.65163109  | -2.26088321 |
| C | -0.10816652 | -4.84293792 | 1.52500574  |
| H | -0.14993988 | -3.19902382 | 2.91377622  |
| C | 0.03003286  | -4.24848396 | -0.80268408 |
| H | 0.09363264  | -2.13278586 | -1.25448240 |
| H | 0.04582116  | 6.28644746  | -0.08528292 |
| F | -0.73498477 | 3.76793976  | -3.04383241 |
| F | -0.61151170 | 5.88586974  | -2.45246258 |
| F | 1.22962895  | 4.72335623  | -2.77656819 |

|   |             |             |             |
|---|-------------|-------------|-------------|
| C | -0.04414542 | -5.23584238 | 0.18549957  |
| H | -0.16250563 | -5.59384380 | 2.30910493  |
| C | 0.04554718  | -4.65163109 | -2.26088321 |
| H | -0.04582116 | -6.28644746 | -0.08528292 |
| F | 0.73498477  | -3.76793976 | -3.04383241 |
| F | 0.61151170  | -5.88586974 | -2.45246258 |
| F | -1.22962895 | -4.72335623 | -2.77656819 |

### 1,3-bis[3-(trifluoromethyl)phenyl]thiourea

#### Global minimum conformer

**E:** -4791.92

**H:** -4639.40

**G:** -4682.44

**N<sub>imag</sub>** = 0

|   |             |             |             |
|---|-------------|-------------|-------------|
| N | -1.05235146 | 0.38800767  | 0.21286455  |
| N | 1.11424986  | -0.25328385 | -0.03035825 |
| C | 0.24241359  | 0.55193196  | 0.69569145  |
| C | 2.48680287  | -0.51270022 | 0.19690485  |
| C | 3.30656880  | -0.68887851 | -0.92728461 |
| C | 4.65751546  | -1.00795081 | -0.76734775 |
| C | 5.20979149  | -1.13740177 | 0.51215591  |
| C | 4.38517252  | -0.96360351 | 1.62673218  |
| C | 3.03060329  | -0.66067550 | 1.48308411  |
| C | -2.22400810 | 1.10811243  | 0.54702866  |
| C | -3.43412271 | 0.40001844  | 0.57569130  |
| C | -4.63231195 | 1.06975331  | 0.83709834  |
| C | -4.63575129 | 2.44631016  | 1.09021490  |
| C | -3.42587770 | 3.14454494  | 1.05701601  |
| C | -2.22339108 | 2.49264394  | 0.78099668  |
| F | -5.89221185 | -0.84379428 | 0.13406212  |
| H | 2.89181026  | -0.57703880 | -1.92594841 |
| S | 0.67944694  | 1.55685306  | 1.94900895  |
| H | -1.23245330 | -0.50195957 | -0.24413887 |
| H | 2.39945099  | -0.53687315 | 2.35352676  |
| H | 0.80203634  | -0.48797536 | -0.96887492 |
| C | 5.53706586  | -1.14590851 | -1.98702525 |
| H | 6.26072707  | -1.38035190 | 0.63234210  |
| F | -7.00238292 | 1.02323761  | 0.50992169  |
| H | -3.44176188 | -0.67185063 | 0.39469435  |
| C | -5.92096055 | 0.28620471  | 0.91215043  |
| H | -5.56796565 | 2.96197597  | 1.29775893  |
| H | -1.29324986 | 3.04516433  | 0.74835111  |
| F | 6.11891940  | 0.05271645  | -2.33372754 |
| F | 4.83887929  | -1.57063224 | -3.08961522 |
| F | 6.56067335  | -2.03396846 | -1.79331250 |
| F | -6.18855904 | -0.13251946 | 2.19604567  |
| H | -3.41838817 | 4.21639456  | 1.23800702  |
| H | 4.80005611  | -1.07586923 | 2.62521000  |

#### Local minimum conformer

**E:** -4791.43

**H:** -4638.97

**G:** -4682.12

**N<sub>imag</sub>** = 0

|   |             |             |             |
|---|-------------|-------------|-------------|
| N | -0.34293673 | 1.08432017  | -1.10752971 |
| N | 0.34293673  | -1.08432017 | -1.10752971 |
| C | 0.00000000  | -0.00000000 | -0.30381131 |
| C | 0.61951772  | -2.41610833 | -0.71644478 |
| C | 1.63423817  | -3.10893038 | -1.39425982 |
| C | 1.90765316  | -4.44227406 | -1.08222753 |
| C | 1.18131164  | -5.09611507 | -0.08653426 |

|   |             |             |             |
|---|-------------|-------------|-------------|
| C | 0.16289719  | -4.40142677 | 0.58106607  |
| C | -0.12777526 | -3.07111448 | 0.27379454  |
| C | -0.61951772 | 2.41610833  | -0.71644478 |
| C | -1.63423817 | 3.10893038  | -1.39425982 |
| C | -1.90765316 | 4.44227406  | -1.08222753 |
| C | -1.18131164 | 5.09611507  | -0.08653426 |
| C | -0.16289719 | 4.40142677  | 0.58106607  |
| C | 0.12777526  | 3.07111448  | 0.27379454  |
| C | 0.60653620  | 5.09999331  | 1.67914068  |
| H | 2.21543107  | -2.59868767 | -2.16058992 |
| S | 0.00000000  | -0.00000000 | 1.35951249  |
| H | -0.69572411 | 0.84214559  | -2.02949583 |
| H | -0.92167184 | -2.54996263 | 0.79083550  |
| H | 0.69572411  | -0.84214559 | -2.02949583 |
| F | -0.86629668 | -6.41214006 | 1.36902848  |
| H | 1.39366982  | -6.13055847 | 0.16474437  |
| C | -0.60653620 | -5.09999331 | 1.67914068  |
| H | -2.21543107 | 2.59868767  | -2.16058992 |
| F | -0.09717151 | 5.11294048  | 2.86074280  |
| H | -1.39366982 | 6.13055847  | 0.16474437  |
| H | 0.92167184  | 2.54996263  | 0.79083550  |
| F | 0.86629668  | 6.41214006  | 1.36902848  |
| F | 1.80953140  | 4.50543286  | 1.94293272  |
| H | -2.69707577 | 4.96800586  | -1.61305388 |
| F | -1.80953140 | -4.50543286 | 1.94293272  |
| F | 0.09717151  | -5.11294048 | 2.86074280  |
| H | 2.69707577  | -4.96800586 | -1.61305388 |

### 1,3-bis[3-(trifluoromethyl)phenyl]selenourea

Global minimum conformer

*E*: -4770.22

*H*: -4618.08

*G*: -4661.54

*N*<sub>imag</sub> = 0

|    |             |             |             |
|----|-------------|-------------|-------------|
| N  | 0.04307034  | 1.13383157  | 0.10287065  |
| N  | -0.04307034 | -1.13383157 | 0.10287065  |
| C  | -0.00000000 | 0.00000000  | 0.89381783  |
| C  | -0.26330441 | -2.48222308 | 0.48024429  |
| C  | 0.46520182  | -3.47224754 | -0.19209526 |
| C  | 0.24373193  | -4.82191437 | 0.09812817  |
| C  | -0.69031689 | -5.19390507 | 1.07144733  |
| C  | -1.41535701 | -4.19909346 | 1.73337168  |
| C  | -1.21718753 | -2.84913895 | 1.44205479  |
| C  | 0.26330441  | 2.48222308  | 0.48024429  |
| C  | -0.46520182 | 3.47224754  | -0.19209526 |
| C  | -0.24373193 | 4.82191437  | 0.09812817  |
| C  | 0.69031689  | 5.19390507  | 1.07144733  |
| C  | 1.41535701  | 4.19909346  | 1.73337168  |
| C  | 1.21718753  | 2.84913895  | 1.44205479  |
| F  | -1.46361978 | 5.48472753  | -1.85439016 |
| H  | 1.20466271  | -3.19221728 | -0.93798105 |
| Se | -0.00000000 | 0.00000000  | 2.72675783  |
| H  | -0.34800639 | 1.02677762  | -0.83025868 |
| H  | -1.79053713 | -2.08475347 | 1.95108751  |
| H  | 0.34800639  | -1.02677762 | -0.83025868 |
| C  | 1.06947888  | -5.87622705 | -0.59931531 |
| H  | -0.85531469 | -6.24253609 | 1.29768953  |
| F  | -0.39325481 | 7.05800880  | -0.74123682 |
| H  | -1.20466271 | 3.19221728  | -0.93798105 |
| C  | -1.06947888 | 5.87622705  | -0.59931531 |
| H  | 0.85531469  | 6.24253609  | 1.29768953  |
| H  | 1.79053713  | 2.08475347  | 1.95108751  |
| F  | 2.22132719  | -6.16519100 | 0.09698607  |

|   |             |             |             |
|---|-------------|-------------|-------------|
| F | 1.46361978  | -5.48472753 | -1.85439016 |
| F | 0.39325481  | -7.05800880 | -0.74123682 |
| F | -2.22132719 | 6.16519100  | 0.09698607  |
| H | 2.15444579  | 4.47847673  | 2.47986029  |
| H | -2.15444579 | -4.47847673 | 2.47986029  |

**Local minimum conformer**

**E:** -4769.87

**H:** -4618.39

**G:** -4659.94

$N_{imag} = 0$

|    |             |             |             |
|----|-------------|-------------|-------------|
| N  | -0.36617986 | 1.07527384  | -1.09921521 |
| N  | 0.36617986  | -1.07527384 | -1.09921521 |
| C  | 0.00000000  | 0.00000000  | -0.30846959 |
| C  | 0.64474174  | -2.40746676 | -0.70248917 |
| C  | 1.72129899  | -3.07117116 | -1.30664260 |
| C  | 1.99906343  | -4.40154165 | -0.98122233 |
| C  | 1.21366445  | -5.07595940 | -0.04670677 |
| C  | 0.13150305  | -4.40857215 | 0.54580910  |
| C  | -0.16230955 | -3.08289968 | 0.22414635  |
| C  | -0.64474174 | 2.40746676  | -0.70248917 |
| C  | -1.72129899 | 3.07117116  | -1.30664260 |
| C  | -1.99906343 | 4.40154165  | -0.98122233 |
| C  | -1.21366445 | 5.07595940  | -0.04670677 |
| C  | -0.13150305 | 4.40857215  | 0.54580910  |
| C  | 0.16230955  | 3.08289968  | 0.22414635  |
| C  | 0.70474084  | 5.13409989  | 1.57486021  |
| H  | 2.34801137  | -2.54168079 | -2.02206066 |
| Se | 0.00000000  | 0.00000000  | 1.52227600  |
| H  | -0.71325703 | 0.83633515  | -2.02514650 |
| H  | -1.00445977 | -2.57990586 | 0.67987972  |
| H  | 0.71325703  | -0.83633515 | -2.02514650 |
| F  | -0.94306554 | -6.43796941 | 1.21453744  |
| H  | 1.42890822  | -6.10734181 | 0.21506482  |
| C  | -0.70474084 | -5.13409989 | 1.57486021  |
| H  | -2.34801137 | 2.54168079  | -2.02206066 |
| F  | 0.07685849  | 5.17909224  | 2.79742764  |
| H  | -1.42890822 | 6.10734181  | 0.21506482  |
| H  | 1.00445977  | 2.57990586  | 0.67987972  |
| F  | 0.94306554  | 6.43796941  | 1.21453744  |
| F  | 1.92245539  | 4.54584119  | 1.77736505  |
| H  | -2.83777165 | 4.90721976  | -1.45251029 |
| F  | -1.92245539 | -4.54584119 | 1.77736505  |
| F  | -0.07685849 | -5.17909224 | 2.79742764  |
| H  | 2.83777165  | -4.90721976 | -1.45251029 |

**1,3-bis[3,5-bis(trifluoromethyl)phenyl]urea**

**E:** -5659.48

**H:** -5497.99

**G:** -5546.70

$N_{imag} = 0$

|   |             |             |            |
|---|-------------|-------------|------------|
| H | -2.82350257 | -0.09103455 | 4.00078762 |
| H | -4.91764024 | -0.01792181 | 4.00079789 |
| N | -5.02869591 | -0.05799406 | 2.99385861 |
| C | -3.87057700 | -0.05443162 | 2.21039922 |
| H | -7.08384551 | 0.01615454  | 4.60111851 |
| N | -2.71245142 | -0.05092517 | 2.99384935 |
| H | -1.75407039 | 0.06778769  | 0.43728135 |
| O | -3.87058573 | -0.05439005 | 0.98588356 |
| C | -1.37264133 | -0.03508765 | 2.55714239 |
| C | -0.37763326 | -0.07933045 | 3.55158864 |
| C | 0.96928060  | -0.05501425 | 3.19958259 |

|   |              |             |             |
|---|--------------|-------------|-------------|
| C | 1.35833484   | 0.00882261  | 1.85643755  |
| C | 0.36471005   | 0.05326194  | 0.87861050  |
| C | -0.99536273  | 0.03091896  | 1.20684266  |
| H | -0.65730748  | -0.12500428 | 4.60111154  |
| C | 2.02883209   | -0.15243383 | 4.27524897  |
| H | 2.40689842   | 0.03254174  | 1.58421242  |
| C | 0.74021692   | 0.09546940  | -0.58931141 |
| C | -6.36850629  | -0.07378239 | 2.55715217  |
| C | -6.74577969  | -0.13977682 | 1.20685047  |
| C | -8.10585113  | -0.16208237 | 0.87861215  |
| C | -9.09947909  | -0.11761156 | 1.85643518  |
| C | -8.71042985  | -0.05379557 | 3.19958244  |
| C | -7.36351661  | -0.02951358 | 3.55159450  |
| H | -5.98706928  | -0.17665949 | 0.43729241  |
| C | -8.48135725  | -0.20427220 | -0.58931047 |
| H | -10.14804208 | -0.14130670 | 1.58420545  |
| C | -9.76998261  | 0.04364244  | 4.27524590  |
| F | -8.23197040  | 0.99907815  | -1.20246027 |
| F | -9.80521896  | -0.48331499 | -0.78223902 |
| F | -7.76399291  | -1.14991243 | -1.27180673 |
| F | 2.06409064   | 0.37445564  | -0.78223658 |
| F | 0.49077093   | -1.10785260 | -1.20249237 |
| F | 0.02289499   | 1.04116157  | -1.27178130 |
| F | 2.46342571   | -1.44668108 | 4.43504354  |
| F | 1.56918004   | 0.26115444  | 5.49837360  |
| F | 3.13140939   | 0.59993293  | 3.98113082  |
| F | -10.20452704 | 1.33790309  | 4.43506451  |
| F | -9.31035161  | -0.36998760 | 5.49836456  |
| F | -10.87258748 | -0.70867597 | 3.98110781  |

### 1,3-bis[3,5-bis(trifluoromethyl)phenyl]thiourea

**E:** -5577.25

**H:** -5417.16

**G:** -5466.43

$N_{imag} = 0$

|   |             |             |             |
|---|-------------|-------------|-------------|
| N | 0.93847736  | 0.78623557  | 0.05366854  |
| N | -1.14599596 | -0.12550294 | 0.09297390  |
| C | -0.42555439 | 1.06314000  | -0.00589803 |
| C | -2.53879263 | -0.31277194 | -0.05778750 |
| C | -3.17615049 | -1.23352604 | 0.78296427  |
| C | -4.54334581 | -1.48664499 | 0.63619816  |
| C | -5.28982693 | -0.82136343 | -0.33717068 |
| C | -4.64079930 | 0.09169879  | -1.17676936 |
| C | -3.27549708 | 0.34859792  | -1.05272510 |
| C | 2.01201115  | 1.70322740  | 0.11842792  |
| C | 3.18343520  | 1.39702417  | -0.58524038 |
| C | 4.28862461  | 2.25013870  | -0.51158425 |
| C | 4.23697410  | 3.41743513  | 0.25121697  |
| C | 3.06333097  | 3.71001123  | 0.95613408  |
| C | 1.95471165  | 2.86517518  | 0.90388094  |
| C | 2.98887669  | 4.99199051  | 1.75936092  |
| H | -2.61223695 | -1.74287442 | 1.56025710  |
| S | -1.09147122 | 2.57615942  | -0.16983756 |
| H | 1.20520230  | -0.14515707 | -0.25446064 |
| H | -2.78743498 | 1.04689369  | -1.71857079 |
| H | -0.67530696 | -0.87844747 | 0.58803689  |
| C | -5.19749390 | -2.52827687 | 1.51657194  |
| H | -6.35141741 | -1.01270196 | -0.44481742 |
| C | -5.45016235 | 0.84160305  | -2.21439981 |
| H | 3.23097228  | 0.50261579  | -1.20124730 |
| C | 5.56158107  | 1.86817614  | -1.23393642 |
| H | 5.09176922  | 4.08227503  | 0.30129666  |
| H | 1.06091357  | 3.09993765  | 1.46518678  |

|   |             |             |             |
|---|-------------|-------------|-------------|
| F | -5.02149925 | -3.79462249 | 1.00711358  |
| F | -6.54248353 | -2.33508040 | 1.64221376  |
| F | -4.66633005 | -2.54053099 | 2.78038235  |
| F | -4.68029111 | 1.28975406  | -3.25104498 |
| F | -6.06571313 | 1.94097452  | -1.66880645 |
| F | -6.44021201 | 0.06192062  | -2.75111818 |
| F | 4.18587847  | 5.29186933  | 2.35412503  |
| F | 2.04805439  | 4.93326704  | 2.74884305  |
| F | 2.66534314  | 6.06225169  | 0.96238032  |
| F | 6.35318879  | 2.94672830  | -1.50222565 |
| F | 5.30744865  | 1.24074962  | -2.42618880 |
| F | 6.31702221  | 0.99382358  | -0.48634128 |

### 1,3-bis[3,5-bis(trifluoromethyl)phenyl]selenourea

*E*: -5555.68

*H*: -5396.00

*G*: -5446.09

*N*<sub>imag</sub> = 0

|    |              |             |             |
|----|--------------|-------------|-------------|
| H  | -2.87990544  | -0.53380834 | 3.87180882  |
| H  | -4.86120763  | 0.42483957  | 3.87193338  |
| N  | -5.00376561  | 0.03385273  | 2.94342931  |
| C  | -3.87060195  | -0.05438863 | 2.15253613  |
| H  | -6.91408462  | 1.60162165  | 3.85545389  |
| N  | -2.73738607  | -0.14274743 | 2.94332983  |
| H  | -1.62397666  | 1.53951365  | 1.14365294  |
| Se | -3.87069233  | -0.05427999 | 0.32343948  |
| C  | -1.38298980  | -0.09585568 | 2.53362231  |
| C  | -0.47776281  | -0.97774362 | 3.13243633  |
| C  | 0.87686436   | -0.93178472 | 2.78382603  |
| C  | 1.33557131   | -0.01893441 | 1.83425997  |
| C  | 0.42047579   | 0.86520118  | 1.24862005  |
| C  | -0.93074875  | 0.84078372  | 1.59194071  |
| H  | -0.82701660  | -1.71034417 | 3.85545097  |
| C  | 1.84577035   | -1.85810201 | 3.48410993  |
| H  | 2.38383718   | 0.01029557  | 1.55929775  |
| C  | 0.90840663   | 1.83837985  | 0.19621038  |
| C  | -6.35817729  | -0.01298364 | 2.53374037  |
| C  | -6.81044796  | -0.94967293 | 1.59213335  |
| C  | -8.16167527  | -0.97406520 | 1.24880038  |
| C  | -9.07673344  | -0.08985688 | 1.83437729  |
| C  | -8.61799494  | 0.82304247  | 2.78388854  |
| C  | -7.26336659  | 0.86898592  | 3.13249060  |
| H  | -6.11723902  | -1.64846368 | 1.14390459  |
| C  | -8.64954057  | -1.94728609 | 0.19640065  |
| H  | -10.12499944 | -0.11907146 | 1.55941787  |
| C  | -9.58690478  | 1.74939009  | 3.48412668  |
| F  | -8.73453355  | -1.34932770 | -1.03647884 |
| F  | -9.89882171  | -2.42905382 | 0.48686551  |
| F  | -7.82076492  | -3.02552815 | 0.06016881  |
| F  | 2.15715830   | 2.32110344  | 0.48741826  |
| F  | 0.99473036   | 1.24002059  | -1.03638144 |
| F  | 0.07901090   | 2.91600295  | 0.05897674  |
| F  | 1.29803990   | -3.09361911 | 3.71547595  |
| F  | 2.21419029   | -1.35921971 | 4.71300950  |
| F  | 2.99419014   | -2.04860295 | 2.77271416  |
| F  | -9.03902438  | 2.98476331  | 3.71588150  |
| F  | -9.95572172  | 1.25031356  | 4.71282965  |
| F  | -10.73511919 | 1.94023128  | 2.77248472  |

### 1-phenyl-3-[3,5-bis(trifluoromethyl)phenyl]urea

*E*: -4872.83

*H*: -4718.98

*G*: -4761.65

$N_{imag} = 0$

|   |             |             |             |
|---|-------------|-------------|-------------|
| N | 0.94878088  | 0.77512379  | 0.19856156  |
| N | -1.14902472 | -0.18028393 | -0.01199382 |
| C | -0.40696429 | 1.01428914  | 0.01098595  |
| C | -2.53572352 | -0.33436877 | -0.17798355 |
| C | -3.03784690 | -1.64976214 | -0.19570540 |
| C | -4.40189401 | -1.88195216 | -0.35664437 |
| C | -5.29897856 | -0.81784938 | -0.50011633 |
| C | -4.79285436 | 0.48297647  | -0.47873670 |
| C | -3.42788876 | 0.74231341  | -0.32135303 |
| C | 2.00746372  | 1.71366701  | 0.27604667  |
| C | 3.29975120  | 1.19580362  | 0.48515626  |
| C | 4.39797314  | 2.05006107  | 0.57296393  |
| C | 4.22542349  | 3.43382015  | 0.45357127  |
| C | 2.94090967  | 3.94464878  | 0.24583287  |
| C | 1.82847088  | 3.10243010  | 0.15529375  |
| H | 2.79259230  | 5.01810068  | 0.15135709  |
| H | -2.35925524 | -2.49236533 | -0.08841498 |
| O | -0.90930265 | 2.12488258  | -0.11950238 |
| H | 1.24469345  | -0.18868986 | 0.30524328  |
| H | -3.04973277 | 1.75509677  | -0.30751380 |
| H | -0.64004124 | -1.05126048 | 0.08742821  |
| C | -4.92764141 | -3.29928927 | -0.31698005 |
| H | -6.35970428 | -1.00014021 | -0.62535336 |
| C | -5.72741750 | 1.65793885  | -0.68181535 |
| H | 3.44161242  | 0.11931903  | 0.57910028  |
| H | 5.38871210  | 1.63183680  | 0.73488476  |
| H | 5.08020778  | 4.10182359  | 0.52179176  |
| H | 0.83716791  | 3.50387481  | -0.00481818 |
| F | -3.98562847 | -4.21594455 | -0.70763039 |
| F | -6.01704847 | -3.47016615 | -1.12495454 |
| F | -5.31787412 | -3.65636969 | 0.95303754  |
| F | -5.40229080 | 2.71984814  | 0.11698306  |
| F | -7.03150527 | 1.33813439  | -0.41842295 |
| F | -5.68507383 | 2.11213121  | -1.97909383 |

### 1-phenyl-3-[3,5-bis(trifluoromethyl)phenyl]thiourea

$E$ : -4790.71

$H$ : -4637.65

$G$ : -4682.92

$N_{imag} = 0$

|   |             |             |             |
|---|-------------|-------------|-------------|
| C | 3.20572336  | 1.10229703  | -1.34744942 |
| C | 4.06896578  | 2.14473195  | -1.68860579 |
| C | 3.69166459  | 3.47208689  | -1.45959125 |
| C | 2.44918877  | 3.74207593  | -0.87544096 |
| C | 1.58065457  | 2.70716291  | -0.52149827 |
| C | -1.84718177 | -1.68091682 | 0.27916223  |
| C | -2.20440934 | -2.35446644 | 1.45438732  |
| C | -3.44017886 | -3.00277978 | 1.54540775  |
| C | -4.33742898 | -2.97914801 | 0.47702226  |
| C | -3.96832314 | -2.30884260 | -0.69572922 |
| C | -2.73531212 | -1.66703043 | -0.80925695 |
| C | -4.94772239 | -2.25015611 | -1.84848697 |
| H | 3.49525335  | 0.06978740  | -1.53874672 |
| S | -1.31796855 | 1.23400780  | -0.98922810 |
| H | 0.08129914  | -1.41947165 | 0.91459114  |
| H | 0.62154210  | 2.92447665  | -0.06936373 |
| H | 1.66960816  | -0.60439991 | -0.32464996 |
| H | 5.03168930  | 1.91729318  | -2.14010894 |
| H | 4.35894685  | 4.28613783  | -1.73126790 |
| H | 2.14952351  | 4.77017363  | -0.68578354 |
| H | -1.52621732 | -2.36222956 | 2.30395938  |



|   |             |             |             |
|---|-------------|-------------|-------------|
| C | -3.77443460 | -3.77078360 | 2.80375765  |
| H | -5.29821862 | -3.47531063 | 0.55131299  |
| H | -2.46052392 | -1.16641422 | -1.72739103 |
| N | -0.57090998 | -1.08593653 | 0.20994897  |
| N | 1.15244414  | 0.26805277  | -0.39520235 |
| C | -0.22300053 | 0.13408293  | -0.38860035 |
| C | 1.95642836  | 1.37781509  | -0.76665721 |
| F | -5.84666027 | -1.22313861 | -1.69185591 |
| F | -5.68345317 | -3.40172811 | -1.95521736 |
| F | -4.32772530 | -2.05440368 | -3.05124882 |
| F | -3.30158075 | -3.14637602 | 3.92992777  |
| F | -3.20953303 | -5.02673143 | 2.79059755  |
| F | -5.11827716 | -3.94432204 | 2.97050672  |

### 1-phenyl-3-[3,5-bis(trifluoromethyl)phenyl]selenourea

*E*: -4769.12

*H*: -4617.05

*G*: -4661.07

*N*<sub>imag</sub> = 0

|    |             |             |             |
|----|-------------|-------------|-------------|
| N  | -0.93421772 | -0.94004236 | -0.07701141 |
| N  | -0.78082112 | 1.31861242  | 0.10613567  |
| C  | -0.06843061 | 0.14802992  | -0.00802232 |
| C  | -0.32411876 | 2.66443785  | 0.04105116  |
| C  | -0.90016956 | 3.59237521  | 0.92169365  |
| C  | -0.52778612 | 4.93751847  | 0.86463218  |
| C  | 0.42583773  | 5.36228857  | -0.06587011 |
| C  | 0.99258807  | 4.43321560  | -0.94634731 |
| C  | 0.62015274  | 3.08838279  | -0.90458766 |
| C  | -0.61199681 | -2.31416051 | -0.02833505 |
| C  | -1.29706689 | -3.18916790 | -0.87808080 |
| C  | -1.03703584 | -4.56385244 | -0.82733729 |
| C  | -0.08866173 | -5.07568841 | 0.05758825  |
| C  | 0.58455482  | -4.19106901 | 0.91061148  |
| C  | 0.32993797  | -2.82057502 | 0.88212386  |
| C  | 1.63447039  | -4.73825745 | 1.85299894  |
| H  | -1.62978317 | 3.25713654  | 1.65725171  |
| Se | 1.75809230  | 0.01498651  | -0.06584920 |
| H  | -1.84881244 | -0.74145388 | -0.47557894 |
| H  | 1.05764596  | 2.37254622  | -1.58967007 |
| H  | -1.72175873 | 1.22099676  | 0.48102364  |
| H  | -0.97724082 | 5.64829524  | 1.55390639  |
| H  | 0.72283178  | 6.40728072  | -0.10676708 |
| H  | 1.72812422  | 4.75653591  | -1.67917990 |
| H  | -2.02022464 | -2.80074022 | -1.59077670 |
| C  | -1.83101282 | -5.48931451 | -1.72005693 |
| H  | 0.11803219  | -6.13924712 | 0.09048354  |
| H  | 0.84548306  | -2.15128760 | 1.55707853  |
| F  | -3.09013540 | -5.71992718 | -1.21125206 |
| F  | -1.23754121 | -6.70852497 | -1.87434154 |
| F  | 2.83674917  | -4.92118849 | 1.21399316  |
| F  | 1.27527106  | -5.95814248 | 2.36633285  |
| F  | 1.87017522  | -3.90789349 | 2.91281758  |
| F  | -2.01296275 | -4.96292502 | -2.97414891 |

### 1-cyclohexyl-3-[3,5-bis(trifluoromethyl)phenyl]urea

*E*: -5385.07

*H*: -5188.34

*G*: -5230.67

*N*<sub>imag</sub> = 0

|   |            |            |            |
|---|------------|------------|------------|
| H | 2.79301723 | 4.02400729 | 3.27992051 |
| H | 2.52200984 | 4.48625847 | 1.60129327 |
| H | 4.60575635 | 2.46075499 | 2.59993117 |

|   |             |             |             |
|---|-------------|-------------|-------------|
| H | 4.94729079  | 4.06999966  | 1.96314419  |
| N | 0.95722491  | 0.78157240  | 0.47002487  |
| N | -1.14369096 | -0.18325633 | 0.23365146  |
| C | -0.38435422 | 1.00243669  | 0.22459701  |
| C | -2.52410119 | -0.32931325 | 0.03305828  |
| C | -3.03876602 | -1.63966958 | -0.00059372 |
| C | -4.40253833 | -1.85829245 | -0.18510092 |
| C | -5.28783751 | -0.78580701 | -0.33699405 |
| C | -4.76955035 | 0.51050641  | -0.30042777 |
| C | -3.40531836 | 0.75610888  | -0.12035935 |
| C | -5.69061648 | 1.69355520  | -0.51404044 |
| F | -4.00825465 | -4.19093714 | -0.56947612 |
| F | -5.64058173 | 2.14030470  | -1.81391513 |
| F | -5.35868923 | 2.75782370  | 0.27941409  |
| F | -6.99967073 | 1.38906574  | -0.25329115 |
| F | -6.03698308 | -3.42431167 | -0.96105617 |
| F | -5.32290966 | -3.64305076 | 1.10881148  |
| H | -2.36949211 | -2.48875786 | 0.11384650  |
| O | -0.86004112 | 2.11158928  | -0.00856849 |
| H | 1.23315663  | -0.09505015 | 0.90156192  |
| H | -3.01489539 | 1.76449443  | -0.10158670 |
| H | -0.63010732 | -1.05420692 | 0.30945727  |
| C | -4.93961613 | -3.27111899 | -0.15999093 |
| H | -6.34791455 | -0.95770699 | -0.48045292 |
| C | 1.88676232  | 1.90943849  | 0.64846707  |
| C | 4.31685104  | 2.62956628  | 0.45744032  |
| C | 3.31459876  | 1.47170076  | 0.27925109  |
| C | 1.82881208  | 2.49006692  | 2.07749953  |
| C | 2.82772843  | 3.65086805  | 2.24868758  |
| C | 4.25981047  | 3.21860798  | 1.88024404  |
| H | 1.55299055  | 2.68206155  | -0.05354284 |
| H | 4.08259607  | 3.42003906  | -0.27103170 |
| H | 5.33122337  | 2.28021498  | 0.22729381  |
| H | 3.61198929  | 0.63282015  | 0.92990970  |
| H | 3.32915584  | 1.10057604  | -0.75301203 |
| H | 2.07067446  | 1.68797072  | 2.79272088  |
| H | 0.80607947  | 2.82190489  | 2.28900910  |

### 1-cyclohexyl-3-[3,5-bis(trifluoromethyl)phenyl]thiourea

*E*: -5305.03

*H*: -5109.64

*G*: -5152.67

*N*<sub>imag</sub> = 0

|   |             |             |             |
|---|-------------|-------------|-------------|
| H | 3.28519007  | 3.18398971  | 3.78743646  |
| H | 2.68294425  | 4.18500362  | 2.46808693  |
| H | 4.89043598  | 2.05729855  | 2.25640279  |
| H | 5.12418121  | 3.80367035  | 2.17057879  |
| N | 0.85523317  | 1.03425692  | 0.44915201  |
| N | -1.15175394 | -0.03056140 | 0.18316524  |
| C | -0.50067087 | 1.17770528  | 0.46050713  |
| C | -2.53019165 | -0.26562597 | 0.01461241  |
| C | -3.05640911 | -1.47624561 | 0.48653488  |
| C | -4.40847409 | -1.77823263 | 0.29863768  |
| C | -5.25630608 | -0.87828588 | -0.34862507 |
| C | -4.72030710 | 0.32506110  | -0.82292738 |
| C | -3.37110931 | 0.63850554  | -0.65666271 |
| C | -5.63813106 | 1.32145589  | -1.49781802 |
| F | -4.67417053 | -4.10807392 | -0.15353528 |
| F | -4.96765079 | 2.16520487  | -2.33882403 |
| F | -6.28818178 | 2.10933573  | -0.57841304 |
| F | -6.61178942 | 0.70199913  | -2.23876676 |
| F | -6.28354108 | -3.10882230 | 0.96821889  |
| F | -4.34874215 | -3.51813785 | 1.94125390  |

|   |             |             |             |
|---|-------------|-------------|-------------|
| H | -2.41498899 | -2.17795821 | 1.01393816  |
| S | -1.28212589 | 2.62233831  | 0.79233047  |
| H | 1.24522860  | 0.14762672  | 0.14219611  |
| H | -2.97094059 | 1.56692291  | -1.03937948 |
| H | -0.61546269 | -0.86849054 | 0.39053658  |
| C | -4.93303378 | -3.11593182 | 0.76652651  |
| H | -6.30620392 | -1.10928555 | -0.48686476 |
| C | 1.82142306  | 2.07929229  | 0.81843231  |
| C | 4.17243723  | 2.94437720  | 0.41245072  |
| C | 3.13154970  | 1.86945579  | 0.04031494  |
| C | 2.06771866  | 2.11251816  | 2.34085913  |
| C | 3.10051081  | 3.19543646  | 2.70605588  |
| C | 4.41839819  | 2.99770181  | 1.93283814  |
| H | 1.36840318  | 3.03221317  | 0.51941113  |
| H | 3.81046539  | 3.92468551  | 0.06930928  |
| H | 5.11081301  | 2.75012093  | -0.12182038 |
| H | 3.53916039  | 0.87340595  | 0.28012005  |
| H | 2.92774660  | 1.88801313  | -1.03805373 |
| H | 2.43562193  | 1.12535873  | 2.66001472  |
| H | 1.11548939  | 2.29200874  | 2.85175755  |

### 1-cyclohexyl-3-[3,5-bis(trifluoromethyl)phenyl]selenourea

*E*: -5284.08

*H*: -5089.04

*G*: -5132.76

*N*<sub>imag</sub> = 0

|    |             |             |             |
|----|-------------|-------------|-------------|
| H  | 3.33332587  | 3.11201664  | 3.81674143  |
| H  | 2.68134005  | 4.14729122  | 2.54827054  |
| H  | 4.92291348  | 2.07183540  | 2.20985010  |
| H  | 5.12207718  | 3.82433600  | 2.18184513  |
| N  | 0.86328861  | 1.04102158  | 0.45961523  |
| N  | -1.12988826 | -0.04468936 | 0.19816693  |
| C  | -0.48791444 | 1.15507320  | 0.48268555  |
| C  | -2.50996900 | -0.28388986 | 0.02409942  |
| C  | -3.04854183 | -1.46791491 | 0.54117743  |
| C  | -4.40336278 | -1.76447456 | 0.35343288  |
| C  | -5.23486872 | -0.88347685 | -0.33815077 |
| C  | -4.68331389 | 0.29348789  | -0.86031406 |
| C  | -3.33260253 | 0.59947161  | -0.69426322 |
| C  | -5.58545032 | 1.26585919  | -1.58827162 |
| F  | -4.65743566 | -4.11503675 | 0.01736779  |
| F  | -4.89572686 | 2.08417476  | -2.43857665 |
| F  | -6.26002764 | 2.08011454  | -0.71082558 |
| F  | -6.53944154 | 0.62027529  | -2.33324853 |
| F  | -6.30054052 | -3.05839951 | 1.03306027  |
| F  | -4.39750030 | -3.41392366 | 2.08674633  |
| H  | -2.41833836 | -2.15066209 | 1.10549053  |
| Se | -1.36575627 | 2.72712814  | 0.89004922  |
| H  | 1.26684883  | 0.15767210  | 0.15619378  |
| H  | -2.91637057 | 1.50408930  | -1.11559303 |
| H  | -0.58552467 | -0.88606504 | 0.37244613  |
| C  | -4.94464203 | -3.07517521 | 0.87457279  |
| H  | -6.28602358 | -1.10951933 | -0.47581127 |
| C  | 1.82271506  | 2.08817761  | 0.84446051  |
| C  | 4.14578136  | 3.01015106  | 0.41585829  |
| C  | 3.11646699  | 1.92925714  | 0.02854573  |
| C  | 2.10210620  | 2.06986068  | 2.36075679  |
| C  | 3.12323691  | 3.15853686  | 2.74098309  |
| C  | 4.42602022  | 3.01384848  | 1.93124170  |
| H  | 1.34381120  | 3.04155851  | 0.59066203  |
| H  | 3.75739241  | 3.99468651  | 0.11669625  |
| H  | 5.07478888  | 2.85339389  | -0.14628734 |
| H  | 3.54779677  | 0.93305730  | 0.22215893  |

|   |            |            |             |
|---|------------|------------|-------------|
| H | 2.88630355 | 1.98299475 | -1.04323220 |
| H | 2.49478640 | 1.07916595 | 2.63688954  |
| H | 1.15793139 | 2.21448173 | 2.89718343  |

### 5,6-dihydroindolo[2,3-*b*]indole (X = C; R = 3-CF<sub>3</sub>-phenyl)

**E:** -4738.32

**H:** -4597.40

**G:** -4637.56

**N<sub>imag</sub>** = 0

|   |             |             |             |
|---|-------------|-------------|-------------|
| C | 0.00000000  | -0.00000000 | -0.07955100 |
| C | -0.02751736 | -1.38155841 | 0.32591486  |
| C | 0.02751736  | 1.38155841  | 0.32591486  |
| C | -0.00000000 | -0.00000000 | -1.48034639 |
| C | -0.03888366 | -2.06177578 | 1.55456623  |
| C | -0.04200278 | -2.15965596 | -0.88505787 |
| C | 0.03888366  | 2.06177578  | 1.55456623  |
| C | 0.04200278  | 2.15965596  | -0.88505787 |
| N | 0.02246621  | 1.27641814  | -1.98830637 |
| N | -0.02246621 | -1.27641814 | -1.98830637 |
| C | -0.06342945 | -3.45488796 | 1.56635814  |
| H | -0.02645621 | -1.50894141 | 2.48994659  |
| C | -0.06652871 | -3.54786224 | -0.88190300 |
| C | 0.06342945  | 3.45488796  | 1.56635814  |
| H | 0.02645621  | 1.50894141  | 2.48994659  |
| C | 0.06652871  | 3.54786224  | -0.88190300 |
| H | 0.03585183  | 1.55394994  | -2.96000200 |
| H | -0.03585183 | -1.55394994 | -2.96000200 |
| C | -0.07425440 | -4.19153230 | 0.36373189  |
| H | -0.06887410 | -3.98638234 | 2.51328339  |
| H | -0.07397931 | -4.12205678 | -1.80343861 |
| C | 0.07425440  | 4.19153230  | 0.36373189  |
| H | 0.06887410  | 3.98638234  | 2.51328339  |
| H | 0.07397931  | 4.12205678  | -1.80343861 |
| C | -0.14882287 | -5.69287512 | 0.42915474  |
| C | 0.14882287  | 5.69287512  | 0.42915474  |
| F | 0.66776925  | -6.21575918 | 1.40144199  |
| F | 0.20380809  | -6.29360680 | -0.75358080 |
| F | -1.42238903 | -6.13764190 | 0.72329386  |
| F | -0.66776925 | 6.21575918  | 1.40144199  |
| F | -0.20380809 | 6.29360680  | -0.75358080 |
| F | 1.42238903  | 6.13764190  | 0.72329386  |

### 5,6-dihydroindolo[2,3-*b*]indole (X = Si; R = 3-CF<sub>3</sub>-phenyl)

**E:** -4617.19

**H:** -4479.29

**G:** -4520.44

**N<sub>imag</sub>** = 0

|    |             |             |             |
|----|-------------|-------------|-------------|
| Si | -0.05579678 | 0.92510223  | -1.18028164 |
| C  | 0.35358305  | -0.87767080 | -0.93475243 |
| C  | 0.07453290  | 1.01782643  | 0.72883939  |
| C  | -1.48968098 | 0.25552965  | -2.26013252 |
| N  | -0.19545604 | -1.72541750 | -1.83863221 |
| N  | 0.90474110  | -1.18926950 | 0.26369736  |
| C  | -0.09180429 | 2.08003091  | 1.63279055  |
| C  | 0.79332917  | -0.12816356 | 1.20456894  |
| C  | -2.50657746 | 0.90322601  | -2.98090347 |
| C  | -1.20825336 | -1.10363668 | -2.62043546 |
| H  | -0.09506952 | -2.73726197 | -1.83398135 |
| H  | 1.16216571  | -2.12458662 | 0.56838760  |
| C  | 0.37994346  | 2.00078138  | 2.94372839  |
| C  | 1.58059361  | 0.78779814  | 4.79179044  |
| C  | 1.32491897  | -0.19840754 | 2.49152573  |

|   |             |             |             |
|---|-------------|-------------|-------------|
| C | -3.23680820 | 0.23807273  | -3.96668388 |
| C | -3.72933553 | -1.80028404 | -5.35635782 |
| C | -1.88588331 | -1.76323912 | -3.64487459 |
| C | 1.09784189  | 0.86898425  | 3.36630423  |
| H | 0.20711085  | 2.81850216  | 3.63732922  |
| F | 2.05591591  | 1.98897610  | 5.25081679  |
| F | 2.58535507  | -0.13128554 | 4.95835754  |
| F | 0.56981877  | 0.41821980  | 5.65446534  |
| H | 1.89527563  | -1.06454554 | 2.81636579  |
| C | -2.91685701 | -1.08763814 | -4.30579790 |
| H | -4.04433882 | 0.74647889  | -4.48536840 |
| F | -4.04778373 | -0.98509270 | -6.41155533 |
| F | -3.08155096 | -2.89286149 | -5.87473249 |
| F | -4.92672398 | -2.26264492 | -4.85144468 |
| H | -1.62974838 | -2.78251470 | -3.92144704 |
| H | -2.74085848 | 1.94306752  | -2.76295133 |
| H | -0.60771970 | 2.98258923  | 1.31204331  |

### 5,6-dihydroindolo[2,3-*b*]indole (X = Ge; 3-CF<sub>3</sub>-phenyl)

*E*: -4587.14

*H*: -4449.76

*G*: -4491.98

*N*<sub>imag</sub> = 0

|    |             |             |             |
|----|-------------|-------------|-------------|
| Ge | 0.88365101  | 1.42536351  | -0.00000000 |
| C  | 1.19094448  | -0.56592563 | -0.00000000 |
| C  | 0.03463634  | 0.88073924  | 1.79337044  |
| C  | 0.03463634  | 0.88073924  | -1.79337044 |
| N  | 1.15064865  | -1.17306491 | -1.19771632 |
| N  | 1.15064865  | -1.17306491 | 1.19771632  |
| C  | -0.57328665 | 1.68213558  | 2.76693305  |
| C  | 0.55874242  | -0.37062960 | 2.22434508  |
| C  | -0.57328665 | 1.68213558  | -2.76693305 |
| C  | 0.55874242  | -0.37062960 | -2.22434508 |
| H  | 1.20626763  | -2.18266066 | -1.32997925 |
| H  | 1.20626763  | -2.18266066 | 1.32997925  |
| C  | -0.71962349 | 1.24136904  | 4.08693195  |
| H  | -0.95936696 | 2.66266574  | 2.49497045  |
| C  | 0.47548997  | -0.80789496 | 3.54503563  |
| C  | -0.71962349 | 1.24136904  | -4.08693195 |
| H  | -0.95936696 | 2.66266574  | -2.49497045 |
| C  | 0.47548997  | -0.80789496 | -3.54503563 |
| C  | -0.18610624 | 0.00400095  | 4.47498838  |
| H  | -1.23551039 | 1.85879215  | 4.81648324  |
| H  | 0.91088925  | -1.75496768 | 3.85361483  |
| C  | -0.18610624 | 0.00400095  | -4.47498838 |
| H  | -1.23551039 | 1.85879215  | -4.81648324 |
| H  | 0.91088925  | -1.75496768 | -3.85361483 |
| C  | -0.37041717 | -0.48579765 | 5.88883190  |
| C  | -0.37041717 | -0.48579765 | -5.88883190 |
| F  | -0.39573246 | 0.53594666  | 6.79967627  |
| F  | 0.62366385  | -1.34846409 | 6.27915165  |
| F  | -1.55759249 | -1.17188875 | 6.04146528  |
| F  | -0.39573246 | 0.53594666  | -6.79967627 |
| F  | 0.62366385  | -1.34846409 | -6.27915165 |
| F  | -1.55759249 | -1.17188875 | -6.04146528 |

### 1,3-bis[4-(trifluoromethyl)phenyl]urea

E: -4875.34

H: -4722.00

G: -4762.80

N<sub>imag</sub> = 0

|   |             |              |             |
|---|-------------|--------------|-------------|
| C | 0.06319095  | -8.41952394  | 0.82605314  |
| C | 0.07750647  | -8.81355901  | -0.52448146 |
| C | 0.05724666  | -9.40701837  | 1.83193078  |
| N | 0.05759936  | -7.07599571  | 1.25009783  |
| C | 0.08457797  | -10.17099274 | -0.84414501 |
| H | 0.08422109  | -8.06252826  | -1.30214477 |
| C | 0.06463906  | -10.75705567 | 1.50205985  |
| H | 0.04905076  | -9.11132823  | 2.88016332  |
| C | 0.05512759  | -5.91864109  | 0.46493062  |
| H | 0.04907232  | -6.95892232  | 2.25717363  |
| C | 0.08142818  | -11.14921848 | 0.15657761  |
| H | 0.09885138  | -10.46741547 | -1.88877466 |
| H | 0.06378049  | -11.50536538 | 2.28887011  |
| N | 0.05270534  | -4.76128890  | 1.25010164  |
| O | 0.05508915  | -5.91863945  | -0.76021634 |
| C | 0.03648224  | -12.61057646 | -0.20173425 |
| C | 0.04708177  | -3.41775908  | 0.82606224  |
| H | 0.06129701  | -4.87836572  | 2.25717649  |
| F | -1.25764355 | -13.08505279 | -0.26921026 |
| F | 0.68288719  | -13.39405877 | 0.72171047  |
| F | 0.60646159  | -12.87074739 | -1.41989997 |
| C | 0.03267459  | -3.02371825  | -0.52446957 |
| C | 0.05308884  | -2.43026876  | 1.83194382  |
| C | 0.02557565  | -1.66628297  | -0.84412696 |
| H | 0.02591162  | -3.77474558  | -1.30213573 |
| C | 0.04566788  | -1.08023033  | 1.50207913  |
| H | 0.06135560  | -2.72596342  | 2.88017455  |
| C | 0.02878672  | -0.68806173  | 0.15659949  |
| H | 0.01123129  | -1.36985583  | -1.88875429 |
| H | 0.04657463  | -0.33192395  | 2.28889262  |
| C | 0.07369993  | 0.77329911   | -0.20170479 |
| F | -0.49631187 | 1.03346906   | -1.41985498 |
| F | 1.36781619  | 1.24779778   | -0.26920619 |
| F | -0.57269683 | 1.55676446   | 0.72176078  |

## Data S7. Cartesian coordinates and energies of optimized hydrogen-bonded complexes

---

Below is a list consisting of the Cartesian coordinates (in Å), ADF total bond energies  $E$ , enthalpies  $H$ , Gibbs free energies  $G$  (in kcal mol<sup>-1</sup>), and the number of imaginary frequencies ( $N_{\text{imag}}$ ) of all optimized hydrogen-bonded complexes reported in this work, optimized at the ZORA-BLYP-D3(BJ)/TZ2P level. It is specified if  $C_{2v}$  symmetry is enforced during the optimization process.

### Formaldehyde–Urea

$E$ : -1559.34

$H$ : -1497.47

$G$ : -1526.53

$N_{\text{imag}} = 0$

|   |             |             |             |
|---|-------------|-------------|-------------|
| N | 1.15351322  | -0.46839336 | -0.26503547 |
| N | -1.11817925 | -0.45487371 | 0.28420239  |
| C | 0.02345509  | 0.29150225  | 0.01513160  |
| C | -0.01607548 | -4.58541910 | -0.03744995 |
| O | 0.03297064  | 1.52266954  | 0.02409967  |
| O | -0.00672882 | -3.37089887 | -0.01746189 |
| H | 2.02675962  | 0.04007522  | -0.20852825 |
| H | -1.98347145 | 0.06780697  | 0.23573500  |
| H | 1.17200607  | -1.45268468 | -0.01961169 |
| H | -1.15188645 | -1.43512230 | 0.02463312  |
| H | 0.91469765  | -5.17859775 | 0.09080988  |
| H | -0.95583087 | -5.15967113 | -0.18493820 |

### Formaldehyde–Thiourea

$E$ : -1481.96

$H$ : -1421.26

$G$ : -1451.64

$N_{\text{imag}} = 0$

|   |             |             |             |
|---|-------------|-------------|-------------|
| N | 1.15772326  | -0.45957692 | -0.16373446 |
| N | -1.12307039 | -0.44644661 | 0.17045731  |
| C | 0.02337417  | 0.27975018  | 0.01617927  |
| C | -0.01570226 | -4.54440136 | -0.03253933 |
| S | 0.03733297  | 1.96458766  | 0.04532135  |
| O | -0.00622696 | -3.32843844 | -0.03157409 |
| H | 2.03428966  | 0.04094910  | -0.18879618 |
| H | -1.99126107 | 0.06716077  | 0.21457674  |
| H | 1.15630215  | -1.47085856 | -0.07861506 |
| H | -1.13802496 | -1.45443015 | 0.05371417  |
| H | 0.92507071  | -5.13397724 | -0.01748645 |
| H | -0.96557504 | -5.11919043 | -0.04854847 |

### Formaldehyde–Selenourea

$E$ : -1461.19

$H$ : -1400.77

$G$ : -1431.77

$N_{\text{imag}} = 0$

|    |             |             |             |
|----|-------------|-------------|-------------|
| N  | 1.16464857  | -0.46852983 | -0.09231803 |
| N  | -1.13005006 | -0.45253332 | 0.10541604  |
| C  | 0.02289441  | 0.25660871  | 0.01352752  |
| C  | -0.01540095 | -4.53117682 | -0.03391233 |
| Se | 0.03733358  | 2.11052964  | 0.03153876  |
| O  | -0.00602287 | -3.31424834 | -0.02229106 |
| H  | 2.03575099  | 0.03697806  | -0.16322662 |
| H  | -1.99317705 | 0.06507003  | 0.18594170  |

|   |             |             |             |
|---|-------------|-------------|-------------|
| H | 1.16116448  | -1.48408686 | -0.10403711 |
| H | -1.14245493 | -1.46805454 | 0.09669327  |
| H | 0.92177961  | -5.11917779 | -0.12329958 |
| H | -0.96155915 | -5.10625402 | 0.04433119  |

### Formaldehyde-1-cyclohexylurea

*E*: -3583.20

*H*: -3426.89

*G*: -3461.73

*N*<sub>imag</sub> = 0

|   |            |             |             |
|---|------------|-------------|-------------|
| N | 3.27482333 | -0.24713294 | -5.96070818 |
| N | 1.00213148 | 0.08412114  | -6.38481949 |
| C | 2.18080458 | 0.58327307  | -5.81938038 |
| C | 2.27266307 | -3.87998088 | -7.73137135 |
| H | 5.71934466 | -0.75223811 | -2.01719951 |
| O | 2.13733361 | -2.69017478 | -7.52843861 |
| H | 1.58186334 | -4.44021423 | -8.39727135 |
| O | 2.21611645 | 1.66759189  | -5.23007485 |
| H | 5.92020322 | 0.76336012  | -2.89424330 |
| H | 6.88464303 | -1.99997021 | -3.82802307 |
| H | 3.09314885 | -4.46401142 | -7.26113074 |
| H | 0.29535906 | 0.79496973  | -6.53282633 |
| H | 3.11756372 | -1.18297723 | -6.32478091 |
| H | 1.06982199 | -0.62769185 | -7.10549715 |
| H | 7.91247784 | -0.68022269 | -3.26596604 |
| C | 4.51378207 | -0.00508877 | -5.21880574 |
| C | 7.03569934 | -0.35560261 | -5.23339538 |
| C | 5.71216977 | -0.58953550 | -5.98802083 |
| C | 4.45374552 | -0.56272365 | -3.77886552 |
| C | 5.77496628 | -0.31961921 | -3.02462236 |
| C | 6.97589814 | -0.90299062 | -3.79387071 |
| H | 4.62252362 | 1.08449405  | -5.15784701 |
| H | 7.24093968 | 0.72491915  | -5.19925534 |
| H | 7.86658399 | -0.81624176 | -5.78371423 |
| H | 5.55745346 | -1.67323427 | -6.12059326 |
| H | 5.75293889 | -0.14639874 | -6.99098823 |
| H | 4.25148377 | -1.64449965 | -3.82988197 |
| H | 3.61235038 | -0.09724504 | -3.25312635 |

### Formaldehyde-1-cyclohexylthiourea

*E*: -3506.80

*H*: -3351.02

*G*: -3388.31

*N*<sub>imag</sub> = 0

|   |             |             |             |
|---|-------------|-------------|-------------|
| H | 0.66238050  | -0.37001684 | 1.34224472  |
| H | -1.35148484 | -0.74811382 | 0.51622071  |
| N | -1.20588488 | -0.01474794 | -0.17137512 |
| C | 0.06125029  | 0.46180403  | -0.42409573 |
| S | 0.38553010  | 1.38076091  | -1.80468772 |
| N | 0.98278057  | 0.14619259  | 0.52557667  |
| C | 2.47131995  | 2.01006121  | 1.24543394  |
| C | 3.93128694  | 2.49912130  | 1.28266667  |
| C | 4.85441343  | 1.46219604  | 1.95125242  |
| C | 4.73703480  | 0.08622015  | 1.26680895  |
| C | 3.27617354  | -0.40369011 | 1.21798475  |
| H | 5.89657971  | 1.80654858  | 1.92754725  |
| H | 2.65882063  | 0.76204974  | -0.50103213 |
| H | 1.83195579  | 2.72451457  | 0.71555084  |
| H | 2.08478157  | 1.91596838  | 2.27236770  |
| H | -1.85849634 | 0.05138160  | -0.94101765 |
| H | 4.57756800  | 1.36274167  | 3.01249172  |
| H | 3.20523218  | -1.35606148 | 0.67700096  |



|   |             |             |            |
|---|-------------|-------------|------------|
| C | 2.36251623  | 0.63765668  | 0.54766722 |
| H | 2.92076799  | -0.58608278 | 2.24596030 |
| H | 4.27476746  | 2.68104385  | 0.25339470 |
| H | 3.99191052  | 3.46048364  | 1.80877650 |
| H | 5.36158289  | -0.65374712 | 1.78408761 |
| H | 5.12189593  | 0.16082607  | 0.23894538 |
| H | 0.44638395  | -2.46780698 | 4.02356338 |
| O | -0.56240523 | -1.73911754 | 2.41699891 |
| H | -1.24694847 | -3.21416023 | 3.63384333 |
| C | -0.45265356 | -2.48394388 | 3.37135742 |

### Formaldehyde-1-cyclohexylselenourea

**E:** -3486.50

**H:** -3331.04

**G:** -3369.27

$N_{imag} = 0$

|    |            |             |             |
|----|------------|-------------|-------------|
| N  | 3.22209046 | -0.27532978 | -5.83276676 |
| N  | 1.03309910 | 0.08212880  | -6.44011295 |
| C  | 2.15895956 | 0.56025573  | -5.83348804 |
| C  | 2.33284166 | -3.79616462 | -7.87356063 |
| H  | 5.80028545 | -0.62000488 | -1.97292194 |
| O  | 2.14590732 | -2.67837613 | -7.43135050 |
| H  | 1.59963130 | -4.28420256 | -8.54922572 |
| Se | 2.15363898 | 2.25604572  | -5.06643743 |
| H  | 5.99486244 | 0.84143556  | -2.93905977 |
| H  | 6.87287102 | -1.98881203 | -3.75350775 |
| H  | 3.24456583 | -4.37763227 | -7.62126580 |
| H  | 0.26663379 | 0.73102458  | -6.55314062 |
| H  | 3.09765652 | -1.19945014 | -6.24382862 |
| H  | 1.04827394 | -0.77097922 | -6.99149135 |
| H  | 7.94588940 | -0.66202735 | -3.30400443 |
| C  | 4.49826906 | -0.01859275 | -5.15730982 |
| C  | 7.00261408 | -0.42677200 | -5.25210862 |
| C  | 5.64709673 | -0.67270682 | -5.94414319 |
| C  | 4.47304061 | -0.50021654 | -3.69210011 |
| C  | 5.82654716 | -0.24379492 | -3.00362493 |
| C  | 6.98586024 | -0.89374950 | -3.78338488 |
| H  | 4.62643489 | 1.07087410  | -5.15861277 |
| H  | 7.22905875 | 0.64914431  | -5.28591126 |
| H  | 7.80195347 | -0.93483644 | -5.80700485 |
| H  | 5.46635308 | -1.75845185 | -6.01256657 |
| H  | 5.65934605 | -0.28100786 | -6.96929198 |
| H  | 4.24602308 | -1.57782222 | -3.67607883 |
| H  | 3.66239693 | 0.01773289  | -3.16773697 |

### Formaldehyde-1-phenylurea

**Global minimum**

**E:** -3073.92

**H:** -2959.79

**G:** -2995.21

$N_{imag} = 0$

|   |             |             |             |
|---|-------------|-------------|-------------|
| N | -0.98946711 | 0.03556856  | 0.53508894  |
| N | -3.27370354 | -0.34877490 | 0.54483561  |
| C | -2.24647496 | 0.52538037  | 0.18738715  |
| C | -0.61353805 | -2.99992311 | -0.68792553 |
| O | -2.45939827 | 1.61769026  | -0.33493422 |
| O | -1.24287763 | -2.98369736 | 0.35447337  |
| H | -0.41516285 | -3.95017121 | -1.22698175 |
| H | -4.17300308 | -0.10887960 | 0.14525651  |
| H | -0.97752976 | -0.89009652 | 0.95531548  |
| H | -3.07646865 | -1.33987396 | 0.64133325  |

|   |             |             |             |
|---|-------------|-------------|-------------|
| H | -0.21133362 | -2.06998567 | -1.14126449 |
| H | -0.39271575 | 2.40341245  | -0.68066399 |
| C | 0.27698701  | 0.59542113  | 0.28122147  |
| C | 1.40171428  | -0.14573803 | 0.70022815  |
| C | 2.69194562  | 0.33192331  | 0.47009510  |
| C | 2.88654271  | 1.55623655  | -0.17957914 |
| C | 1.76983197  | 2.29280237  | -0.58909832 |
| C | 0.46986627  | 1.83007269  | -0.36678997 |
| H | 1.25690876  | -1.09185550 | 1.22015732  |
| H | 3.54576158  | -0.25332777 | 0.80489171  |
| H | 3.89125614  | 1.93123779  | -0.35786650 |
| H | 1.90626480  | 3.24886045  | -1.09041854 |

**Local minimum**

**E:** -3073.52

**H:** -2960.01

**G:** -2994.31

$N_{imag} = 0$

|   |             |             |             |
|---|-------------|-------------|-------------|
| N | -0.97041216 | 0.09619172  | 0.12687970  |
| N | -3.25826861 | -0.25778940 | 0.27610916  |
| C | -2.23471989 | 0.67951603  | 0.13404334  |
| C | -0.63500407 | -3.83553764 | -0.08988807 |
| O | -2.45695417 | 1.88745561  | 0.06720745  |
| O | -1.42916602 | -2.91852977 | -0.01233618 |
| H | -0.96947336 | -4.88049904 | -0.25783244 |
| H | -4.17976135 | 0.10623133  | 0.06746270  |
| H | -0.94600859 | -0.91966110 | 0.18020973  |
| H | -3.09419817 | -1.23206819 | 0.04657623  |
| H | 0.45970547  | -3.67001420 | 0.00343008  |
| H | -0.41050618 | 2.75976788  | -0.06341879 |
| C | 0.28558423  | 0.72414690  | 0.04366493  |
| C | 1.42373220  | -0.10887885 | 0.05941541  |
| C | 2.70560063  | 0.43368641  | -0.02120020 |
| C | 2.88085639  | 1.81909764  | -0.11868306 |
| C | 1.75235562  | 2.64555783  | -0.13293085 |
| C | 0.46063667  | 2.11781975  | -0.05313874 |
| H | 1.29489742  | -1.18773636 | 0.13893176  |
| H | 3.56905383  | -0.22821853 | -0.00630934 |
| H | 3.87921306  | 2.24495302  | -0.18109108 |
| H | 1.87283706  | 3.72450898  | -0.20710173 |

**Formaldehyde-1-phenylthiourea**

**E:** -2994.31

**H:** -2881.33

**G:** -2917.71

$N_{imag} = 0$

|   |             |             |             |
|---|-------------|-------------|-------------|
| N | -1.01128868 | 0.10055562  | 0.52661417  |
| N | -3.22648151 | -0.44356180 | 0.59205885  |
| C | -2.28652408 | 0.47919240  | 0.17446365  |
| C | -0.63612808 | -2.88697388 | -0.75010821 |
| S | -2.76280592 | 1.88132561  | -0.61674107 |
| O | -1.17688789 | -2.92594249 | 0.34071381  |
| H | -0.40076613 | -3.81615865 | -1.30989554 |
| H | -4.16623336 | -0.27849837 | 0.25420650  |
| H | -0.96570787 | -0.79919114 | 1.00176453  |
| H | -2.95214524 | -1.41055242 | 0.74752709  |
| H | -0.35614570 | -1.92574457 | -1.22863500 |
| H | -0.32432507 | 2.43463731  | -0.77104751 |
| C | 0.26670792  | 0.64053417  | 0.26514767  |
| C | 1.36056098  | -0.11849592 | 0.73509313  |
| C | 2.66865697  | 0.31227582  | 0.52196247  |
| C | 2.91380322  | 1.50803857  | -0.16385797 |

|   |            |             |             |
|---|------------|-------------|-------------|
| C | 1.82973082 | 2.26111543  | -0.62421171 |
| C | 0.51103600 | 1.84444482  | -0.41750371 |
| H | 1.17626203 | -1.04443942 | 1.27836242  |
| H | 3.49619665 | -0.28633499 | 0.89615679  |
| H | 3.93300122 | 1.84782075  | -0.33028027 |
| H | 2.00469822 | 3.19550773  | -1.15330382 |

### Formaldehyde-1-phenylselenourea

**E:** -2973.04

**H:** -2861.02

**G:** -2896.77

$N_{imag} = 0$

|    |             |             |             |
|----|-------------|-------------|-------------|
| N  | -0.99956755 | 0.05284079  | 0.37954009  |
| N  | -3.22071242 | -0.46572825 | 0.40411813  |
| C  | -2.27330779 | 0.49921734  | 0.16922890  |
| C  | -0.63440783 | -3.04021609 | -0.74398404 |
| Se | -2.83419999 | 2.17329930  | -0.38212261 |
| O  | -1.00525354 | -2.93394302 | 0.41146438  |
| H  | -0.50798139 | -4.03458262 | -1.21938668 |
| H  | -4.18316252 | -0.15368839 | 0.41064737  |
| H  | -0.94224886 | -0.91172649 | 0.71444150  |
| H  | -2.99153429 | -1.33047337 | 0.88642694  |
| H  | -0.40824423 | -2.14996190 | -1.36733862 |
| H  | -0.31393785 | 2.40460354  | -0.88051153 |
| C  | 0.27677488  | 0.63576492  | 0.19777805  |
| C  | 1.36415280  | -0.09337823 | 0.72291243  |
| C  | 2.66888094  | 0.37386975  | 0.57288687  |
| C  | 2.91335921  | 1.57685118  | -0.10051848 |
| C  | 1.83378673  | 2.29727804  | -0.62012810 |
| C  | 0.51977043  | 1.84028439  | -0.48142827 |
| H  | 1.17750398  | -1.02248518 | 1.25911240  |
| H  | 3.49364706  | -0.20008595 | 0.98937080  |
| H  | 3.92954391  | 1.94616912  | -0.21482555 |
| H  | 2.00886522  | 3.23331105  | -1.14626149 |

### Formaldehyde-1-[3-(trifluoromethyl)phenyl]urea

**E:** -3469.63

**H:** -3351.95

**G:** -3390.27

$N_{imag} = 0$

|   |             |             |             |
|---|-------------|-------------|-------------|
| N | -0.98280576 | 0.23205759  | 0.24931064  |
| N | -3.16734823 | -0.39925818 | 0.69137348  |
| C | -2.27820743 | 0.65981892  | 0.54267842  |
| C | -0.14688563 | -3.43446941 | -0.80369116 |
| O | -2.61342545 | 1.83236312  | 0.69774919  |
| O | -1.02229814 | -2.72485604 | -0.34455027 |
| H | -0.35257442 | -4.48096718 | -1.10964444 |
| H | -4.14289122 | -0.12985193 | 0.70937194  |
| H | -0.85380684 | -0.77184080 | 0.13236095  |
| H | -2.95080804 | -1.31464032 | 0.31246616  |
| H | 0.89330988  | -3.06975842 | -0.93804959 |
| H | 1.34954795  | -0.76557048 | -0.30211745 |
| C | 0.16636071  | 1.00959605  | 0.05117765  |
| C | 0.19433450  | 2.41602607  | 0.12766566  |
| C | 1.39427610  | 3.09406690  | -0.09869383 |
| C | 2.57624379  | 2.41355612  | -0.40075247 |
| C | 2.54369738  | 1.01468444  | -0.47411474 |
| C | 1.35688219  | 0.31889942  | -0.24660737 |
| H | -0.71850341 | 2.94945252  | 0.35890373  |
| H | 1.40281335  | 4.17995904  | -0.03978432 |
| H | 3.50088452  | 2.95272662  | -0.58015376 |

|   |            |             |             |
|---|------------|-------------|-------------|
| C | 3.81239372 | 0.24548160  | -0.74206202 |
| F | 4.65400734 | 0.90068494  | -1.60014128 |
| F | 3.57210564 | -0.99545422 | -1.29045488 |
| F | 4.53210994 | 0.01887136  | 0.41110628  |

### Formaldehyde-1-[3-(trifluoromethyl)phenyl]thiourea

*E*: -3389.73

*H*: -3273.22

*G*: -3312.34

*N*<sub>imag</sub> = 0

|   |             |             |             |
|---|-------------|-------------|-------------|
| N | -0.94336428 | 0.22638416  | 0.23484750  |
| N | -3.09811587 | -0.39436637 | 0.65344835  |
| C | -2.21668862 | 0.65546620  | 0.54123713  |
| C | -0.28752804 | -3.47191346 | -0.92779589 |
| S | -2.73407419 | 2.23132120  | 0.80591558  |
| O | -1.07738698 | -2.72578157 | -0.37846951 |
| H | -0.58702577 | -4.48849115 | -1.25517034 |
| H | -4.07187733 | -0.14945056 | 0.77051820  |
| H | -0.85218776 | -0.78454500 | 0.12589352  |
| H | -2.86807388 | -1.32679091 | 0.32441057  |
| H | 0.76222950  | -3.17027151 | -1.12547924 |
| H | -0.41871699 | 2.93930701  | 0.19117969  |
| C | 0.26786976  | 0.90532526  | 0.01354409  |
| C | 1.38686495  | 0.08341542  | -0.22798123 |
| C | 2.63652629  | 0.64008609  | -0.49043141 |
| C | 2.80716698  | 2.03139847  | -0.50478477 |
| C | 1.69824116  | 2.84174878  | -0.25584171 |
| C | 0.43502644  | 2.30163726  | 0.00109938  |
| H | 1.27283707  | -0.99598315 | -0.20875709 |
| C | 3.82194723  | -0.26718859 | -0.70301464 |
| H | 3.78099234  | 2.46450161  | -0.71023623 |
| F | 4.52612096  | -0.47909102 | 0.46097359  |
| F | 4.71405243  | 0.23862043  | -1.60920109 |
| F | 3.45526839  | -1.51528693 | -1.15969825 |
| H | 1.81284530  | 3.92308213  | -0.26504701 |

### Formaldehyde-1-[3-(trifluoromethyl)phenyl]selenourea

*E*: -3368.51

*H*: -3252.95

*G*: -3291.38

*N*<sub>imag</sub> = 0

|    |             |             |             |
|----|-------------|-------------|-------------|
| N  | -0.96629331 | 0.24241420  | 0.12693599  |
| N  | -3.16341246 | -0.34225368 | 0.24253217  |
| C  | -2.26258617 | 0.68181690  | 0.18568985  |
| C  | -0.15937843 | -3.56675657 | -0.34429664 |
| Se | -2.88606305 | 2.42358160  | 0.21443550  |
| O  | -1.01944704 | -2.76566427 | -0.02526532 |
| H  | -0.40243813 | -4.63517535 | -0.51538437 |
| H  | -4.14252402 | -0.09647515 | 0.28831598  |
| H  | -0.86381839 | -0.77437594 | 0.15223083  |
| H  | -2.89154790 | -1.31993477 | 0.21039599  |
| H  | 0.90032233  | -3.26514013 | -0.47771729 |
| H  | -0.41467618 | 2.92467315  | -0.23338166 |
| C  | 0.27435575  | 0.90159405  | 0.03188616  |
| C  | 1.40804804  | 0.07105334  | 0.12486537  |
| C  | 2.69062586  | 0.60311380  | 0.01038389  |
| C  | 2.87502988  | 1.97911237  | -0.18377260 |
| C  | 1.74827075  | 2.79879198  | -0.26742382 |
| C  | 0.45416624  | 2.28113793  | -0.16556901 |
| H  | 1.28071344  | -0.99447190 | 0.28935944  |
| C  | 3.88524402  | -0.30549746 | 0.15462194  |
| H  | 3.87454643  | 2.39290679  | -0.27291302 |

|   |            |             |             |
|---|------------|-------------|-------------|
| F | 4.36256693 | -0.33136584 | 1.44561247  |
| F | 4.93294767 | 0.07562765  | -0.63886424 |
| F | 3.59423511 | -1.61321630 | -0.17107076 |
| H | 1.87387712 | 3.86781411  | -0.42194160 |

### Formaldehyde-1-[3,5-bis(trifluoromethyl)phenyl]urea

*E*: -3863.05

*H*: -3741.30

*G*: -3784.01

*N*<sub>imag</sub> = 0

|   |             |             |             |
|---|-------------|-------------|-------------|
| N | -0.97865241 | 0.12952767  | 0.03490702  |
| N | -3.23617740 | -0.37668520 | -0.08534019 |
| C | -2.27220850 | 0.61413700  | -0.19128587 |
| C | -0.27469045 | -3.74323726 | 0.29661636  |
| O | -2.54539534 | 1.78922533  | -0.42219710 |
| O | -1.11242036 | -2.86402552 | 0.21779704  |
| H | -0.55386721 | -4.81478764 | 0.23205209  |
| H | -4.15800324 | -0.11343544 | -0.40927532 |
| H | -0.89058879 | -0.87234729 | 0.19918796  |
| H | -2.98840495 | -1.35873536 | -0.12774571 |
| H | 0.80289592  | -3.51433710 | 0.43569218  |
| H | -0.59059356 | 2.79700717  | -0.37811427 |
| C | 0.22268913  | 0.84340967  | 0.02587821  |
| C | 1.40389549  | 0.11180606  | 0.26058567  |
| C | 2.64349387  | 0.74631178  | 0.25910305  |
| C | 2.74441115  | 2.12340134  | 0.03163558  |
| C | 1.56896849  | 2.84406539  | -0.19385940 |
| C | 0.31338330  | 2.22912284  | -0.20177312 |
| H | 1.34627911  | -0.95738709 | 0.44153816  |
| C | 3.88813935  | -0.05216293 | 0.56621352  |
| H | 3.70888825  | 2.61722398  | 0.03122475  |
| C | 1.64715401  | 4.32617816  | -0.49543749 |
| F | 2.80836181  | 4.89081471  | -0.03827116 |
| F | 0.61261403  | 5.02486289  | 0.06219575  |
| F | 1.60027104  | 4.56508995  | -1.84988841 |
| F | 4.98148076  | 0.40103074  | -0.11749566 |
| F | 3.74415446  | -1.38478206 | 0.25651459  |
| F | 4.21019671  | -0.00007429 | 1.90308728  |

### Formaldehyde-1-[3,5-bis(trifluoromethyl)phenyl]thiourea

*E*: -3782.83

*H*: -3662.28

*G*: -3705.82

*N*<sub>imag</sub> = 0

|   |             |             |             |
|---|-------------|-------------|-------------|
| N | -1.03854796 | 0.20608217  | 0.05181554  |
| N | -3.21969139 | -0.45721752 | -0.01712838 |
| C | -2.35287499 | 0.60238049  | -0.11125092 |
| C | -0.14210512 | -3.65482475 | 0.21676287  |
| S | -2.92572581 | 2.15816220  | -0.36574473 |
| O | -1.00525183 | -2.79613712 | 0.23084602  |
| H | -0.40062915 | -4.73119383 | 0.15235242  |
| H | -4.19412875 | -0.26409484 | -0.20319190 |
| H | -0.91189981 | -0.79525342 | 0.20562784  |
| H | -2.90346389 | -1.42132050 | 0.00199734  |
| H | 0.93713311  | -3.40014956 | 0.26684883  |
| H | -0.56568618 | 2.88413763  | -0.40719436 |
| C | 0.17426347  | 0.90899558  | 0.03088509  |
| C | 1.32980055  | 0.14035207  | 0.27982794  |
| C | 2.59173024  | 0.72590964  | 0.26527637  |
| C | 2.74253188  | 2.09464821  | 0.01265385  |
| C | 1.59412697  | 2.85210543  | -0.22505405 |
| C | 0.31596965  | 2.28358961  | -0.22217888 |

|   |            |             |             |
|---|------------|-------------|-------------|
| H | 1.23250234 | -0.92112297 | 0.48487030  |
| C | 3.80627176 | -0.11369107 | 0.58331306  |
| H | 3.72440213 | 2.55331628  | 0.00278803  |
| C | 1.72592376 | 4.32490644  | -0.55559173 |
| F | 2.89576714 | 4.86012630  | -0.08495506 |
| F | 0.70379393 | 5.06698214  | -0.03542143 |
| F | 1.71622748 | 4.53434851  | -1.91537134 |
| F | 4.90568848 | 0.26818585  | -0.13272379 |
| F | 3.60034422 | -1.44955874 | 0.32217295  |
| F | 4.15144776 | -0.02943669 | 1.91166064  |

### Formaldehyde-1-[3,5-bis(trifluoromethyl)phenyl]selenourea

**E:** -3761.56

**H:** -3641.37

**G:** -3685.80

$N_{imag} = 0$

|    |             |             |             |
|----|-------------|-------------|-------------|
| N  | -1.04517801 | 0.18928275  | 0.09720800  |
| N  | -3.23210999 | -0.44544651 | 0.06069290  |
| C  | -2.35595956 | 0.59940690  | 0.07293091  |
| C  | -0.08426563 | -3.60350248 | -0.08353648 |
| Se | -3.00292862 | 2.32888063  | 0.08220039  |
| O  | -0.98141561 | -2.80110738 | 0.10359799  |
| H  | -0.29558153 | -4.68467117 | -0.20849460 |
| H  | -4.21803332 | -0.22464657 | 0.09062619  |
| H  | -0.91405439 | -0.82198683 | 0.17397554  |
| H  | -2.93512639 | -1.41573541 | 0.09982132  |
| H  | 0.97878935  | -3.28940222 | -0.13736659 |
| H  | -0.56546172 | 2.82672110  | -0.52719381 |
| C  | 0.17091670  | 0.89124303  | 0.07156997  |
| C  | 1.31850012  | 0.14414752  | 0.39519326  |
| C  | 2.58231006  | 0.73008343  | 0.35752489  |
| C  | 2.73423576  | 2.07682007  | 0.01371060  |
| C  | 1.58901544  | 2.81405665  | -0.30146357 |
| C  | 0.31395788  | 2.24286431  | -0.28407002 |
| H  | 1.21637633  | -0.89786293 | 0.68347281  |
| C  | 3.78490975  | -0.09252003 | 0.75476082  |
| H  | 3.71550553  | 2.53660970  | -0.00942070 |
| C  | 1.74094076  | 4.25526704  | -0.74328500 |
| F  | 2.80569117  | 4.86973434  | -0.13676669 |
| F  | 0.63372991  | 5.00476730  | -0.47618773 |
| F  | 1.96217678  | 4.33915447  | -2.10005321 |
| F  | 4.93594229  | 0.34136089  | 0.16293476  |
| F  | 3.63497653  | -1.42074160 | 0.41913662  |
| F  | 4.00006041  | -0.06254946 | 2.11237398  |

### Formaldehyde-1,3-dicyclohexylurea

**E:** -5606.83

**H:** -5353.74

**G:** -5401.58

$N_{imag} = 0$

|   |             |             |             |
|---|-------------|-------------|-------------|
| H | -0.05777810 | 1.09467044  | -1.13238953 |
| H | 0.05777810  | -1.09467044 | -1.13238953 |
| N | 0.26463644  | -1.13583656 | -0.13835780 |
| C | -0.00000000 | 0.00000000  | 0.61597988  |
| O | -0.00000000 | 0.00000000  | 1.85359185  |
| N | -0.26463644 | 1.13583656  | -0.13835780 |
| H | 2.17816014  | 4.80703455  | 1.40201692  |
| H | 0.74561562  | 4.35425424  | 2.32397147  |
| H | 0.76309224  | 5.54873471  | -0.50629247 |
| H | 0.25222783  | 6.37944570  | 0.96460919  |
| C | -0.25665674 | 2.46337665  | 0.48155254  |
| C | -1.13301874 | 4.84558631  | 0.27584117  |

|   |             |             |             |
|---|-------------|-------------|-------------|
| C | -1.11690114 | 3.43516896  | -0.34590272 |
| C | 1.17339261  | 3.01680103  | 0.67476917  |
| C | 1.15431624  | 4.42282332  | 1.30447932  |
| C | 0.29235914  | 5.39617597  | 0.47753237  |
| H | -0.70958609 | 2.33719862  | 1.47217926  |
| H | -1.64241824 | 4.80069532  | 1.25026630  |
| H | -1.72011160 | 5.52610073  | -0.35487060 |
| H | -0.70674404 | 3.49428040  | -1.36763972 |
| H | -2.13552232 | 3.03639839  | -0.43198616 |
| H | 1.66841728  | 3.05966900  | -0.30855927 |
| H | 1.74277541  | 2.31789502  | 1.29800555  |
| C | -1.17339261 | -3.01680103 | 0.67476917  |
| C | -1.15431624 | -4.42282332 | 1.30447932  |
| C | 0.25665674  | -2.46337665 | 0.48155254  |
| H | -1.74277541 | -2.31789502 | 1.29800555  |
| H | -1.66841728 | -3.05966900 | -0.30855927 |
| C | -0.29235914 | -5.39617597 | 0.47753237  |
| H | -2.17816014 | -4.80703455 | 1.40201692  |
| H | -0.74561562 | -4.35425424 | 2.32397147  |
| C | 1.11690114  | -3.43516896 | -0.34590272 |
| H | 0.70958609  | -2.33719862 | 1.47217926  |
| C | 1.13301874  | -4.84558631 | 0.27584117  |
| H | -0.25222783 | -6.37944570 | 0.96460919  |
| H | -0.76309224 | -5.54873471 | -0.50629247 |
| H | 2.13552232  | -3.03639839 | -0.43198616 |
| H | 0.70674404  | -3.49428040 | -1.36763972 |
| H | 1.72011160  | -5.52610073 | -0.35487060 |
| H | 1.64241824  | -4.80069532 | 1.25026630  |
| C | 0.00000000  | 0.00000000  | -4.29855089 |
| H | 0.08706112  | 0.94147473  | -4.88262234 |
| H | -0.08706112 | -0.94147473 | -4.88262234 |
| O | 0.00000000  | 0.00000000  | -3.08422616 |

### Formaldehyde-1,3-dicyclohexylthiourea

*E*: -5531.02

*H*: -5280.22

*G*: -5324.90

*N*<sub>imag</sub> = 0

|   |             |             |             |
|---|-------------|-------------|-------------|
| H | -0.06778414 | 1.05314379  | -1.01341577 |
| H | 0.06591666  | -1.05336422 | -1.01334941 |
| N | 0.17041779  | -1.13499789 | -0.00483617 |
| C | -0.00104085 | -0.00006341 | 0.74210287  |
| S | -0.00116237 | -0.00001850 | 2.43750596  |
| N | -0.17239021 | 1.13483175  | -0.00491800 |
| H | 2.15896043  | 4.92559541  | 1.37825902  |
| H | 0.70842080  | 4.50097236  | 2.28540449  |
| H | 0.78770776  | 5.52904054  | -0.60915990 |
| H | 0.22023066  | 6.43482594  | 0.79511822  |
| C | -0.20968316 | 2.49517064  | 0.53660689  |
| C | -1.11869875 | 4.83912817  | 0.15987156  |
| C | -1.06241366 | 3.39470273  | -0.37586057 |
| C | 1.20629534  | 3.07881850  | 0.73129450  |
| C | 1.14476172  | 4.51832618  | 1.27547706  |
| C | 0.29128476  | 5.42565705  | 0.36844788  |
| H | -0.68635082 | 2.41921625  | 1.52103652  |
| H | -1.65568883 | 4.84235381  | 1.12009828  |
| H | -1.69803517 | 5.46976505  | -0.52715699 |
| H | -0.62517125 | 3.40023460  | -1.38813718 |
| H | -2.07247717 | 2.97437849  | -0.46298037 |
| H | 1.72772790  | 3.07090198  | -0.23890569 |
| H | 1.76357402  | 2.42614060  | 1.41215680  |
| C | -1.20842796 | -3.07892005 | 0.73124541  |
| C | -1.14701489 | -4.51840235 | 1.27550880  |

|   |             |             |             |
|---|-------------|-------------|-------------|
| C | 0.20759432  | -2.49531037 | 0.53676466  |
| H | -1.76580692 | -2.42619786 | 1.41198338  |
| H | -1.72969995 | -3.07104030 | -0.23904142 |
| C | -0.29340519 | -5.42579488 | 0.36866651  |
| H | -2.16123922 | -4.92564529 | 1.37814161  |
| H | -0.71084177 | -4.50100777 | 2.28550809  |
| C | 1.06046071  | -3.39490573 | -0.37551343 |
| H | 0.68409894  | -2.41931249 | 1.52126971  |
| C | 1.11662578  | -4.83930616 | 0.16029970  |
| H | -0.22244498 | -6.43494503 | 0.79539671  |
| H | -0.78966594 | -5.52921398 | -0.60901987 |
| H | 2.07054740  | -2.97460592 | -0.46248271 |
| H | 0.62338973  | -3.40047900 | -1.38786387 |
| H | 1.69606568  | -5.46998875 | -0.52659956 |
| H | 1.65345322  | -4.84249536 | 1.12061755  |
| C | -0.00026440 | -0.00015061 | -4.14688062 |
| H | 0.01992670  | 0.94521176  | -4.72958873 |
| H | -0.02008999 | -0.94549871 | -4.72962429 |
| O | -0.00065231 | -0.00016547 | -2.93153970 |

### Formaldehyde-1,3-dicyclohexylselenourea

*E*: -5511.05

*H*: -5260.55

*G*: -5305.91

*N*<sub>imag</sub> = 0

|    |             |             |             |
|----|-------------|-------------|-------------|
| H  | -0.06871339 | 1.05614501  | -1.01483806 |
| H  | 0.06783163  | -1.05639429 | -1.01475180 |
| N  | 0.14430769  | -1.13696759 | -0.00258851 |
| C  | -0.00124661 | -0.00010623 | 0.73086577  |
| Se | -0.00212658 | -0.00009106 | 2.59901886  |
| N  | -0.14610158 | 1.13673998  | -0.00274550 |
| H  | 2.16159996  | 4.94364855  | 1.36689495  |
| H  | 0.71781840  | 4.50794741  | 2.27967258  |
| H  | 0.77837082  | 5.53759018  | -0.61518379 |
| H  | 0.20954225  | 6.43886423  | 0.79140085  |
| C  | -0.19269883 | 2.49920808  | 0.53636993  |
| C  | -1.12014285 | 4.83389819  | 0.16105142  |
| C  | -1.05573861 | 3.38968938  | -0.37465012 |
| C  | 1.22014399  | 3.09039173  | 0.72386875  |
| C  | 1.14995674  | 4.52928720  | 1.26811860  |
| C  | 0.28646213  | 5.43035176  | 0.36429132  |
| H  | -0.66431734 | 2.41992138  | 1.52323191  |
| H  | -1.65355282 | 4.83308634  | 1.12316681  |
| H  | -1.70654167 | 5.46000084  | -0.52403367 |
| H  | -0.62287351 | 3.39764424  | -1.38882396 |
| H  | -2.06330937 | 2.96224790  | -0.45644070 |
| H  | 1.73853952  | 3.08528039  | -0.24794070 |
| H  | 1.78251827  | 2.44135962  | 1.40415929  |
| C  | -1.22284546 | -3.09042883 | 0.72282141  |
| C  | -1.15334350 | -4.52932108 | 1.26716404  |
| C  | 0.19024504  | -2.49943245 | 0.53659765  |
| H  | -1.78575410 | -2.44130811 | 1.40258484  |
| H  | -1.74035214 | -3.08527067 | -0.24946149 |
| C  | -0.28915025 | -5.43051324 | 0.36413449  |
| H  | -2.16513107 | -4.94354601 | 1.36503196  |
| H  | -0.72211863 | -4.50801808 | 2.27910861  |
| C  | 1.05399776  | -3.39004250 | -0.37361788 |
| H  | 0.66097471  | -2.42018770 | 1.52388756  |
| C  | 1.11771917  | -4.83425089 | 0.16216842  |
| H  | -0.21275481 | -6.43903184 | 0.79132394  |
| H  | -0.78018243 | -5.53769486 | -0.61578676 |
| H  | 2.06170052  | -2.96273738 | -0.45449556 |
| H  | 0.62205916  | -3.39795891 | -1.38818703 |



|   |             |             |             |
|---|-------------|-------------|-------------|
| H | 1.70466104  | -5.46044374 | -0.52236875 |
| H | 1.65024873  | -4.83349310 | 1.12477169  |
| C | 0.00106207  | 0.00007079  | -4.12892038 |
| H | 0.01802878  | 0.94550710  | -4.71102382 |
| H | -0.01530723 | -0.94521687 | -4.71128183 |
| O | 0.00043713  | -0.00008462 | -2.91269435 |

### Formaldehyde-1,3-diphenylurea

*E*: -4587.19

*H*: -4421.98

*G*: -4462.30

*N*<sub>imag</sub> = 0

|   |            |             |             |
|---|------------|-------------|-------------|
| N | 0.17471484 | 3.05648197  | -0.24606526 |
| N | 0.19881751 | 0.75011517  | -0.24606474 |
| C | 0.18676841 | 1.90329876  | 0.54188283  |
| C | 0.21360525 | -0.59524717 | 0.17070599  |
| C | 0.22178803 | -1.57612818 | -0.84293322 |
| C | 0.23687596 | -2.93217792 | -0.52040817 |
| C | 0.24404008 | -3.33997667 | 0.81892908  |
| C | 0.23587590 | -2.36706478 | 1.82350231  |
| C | 0.22073631 | -1.00298838 | 1.51807934  |
| C | 0.15992418 | 4.40184446  | 0.17070483  |
| C | 0.15173956 | 5.38272495  | -0.84293488 |
| C | 0.13665113 | 6.73877486  | -0.52041053 |
| C | 0.12948292 | 7.14657426  | 0.81892650  |
| C | 0.13765717 | 6.17366300  | 1.82350024  |
| C | 0.15279624 | 4.80958643  | 1.51807797  |
| H | 0.13225072 | 6.47504649  | 2.86907306  |
| H | 0.21625181 | -1.26508438 | -1.88698154 |
| O | 0.18676854 | 1.90329900  | 1.77104729  |
| H | 0.17701025 | 2.92588943  | -1.25328404 |
| H | 0.21436909 | -0.25472174 | 2.29912835  |
| H | 0.19651917 | 0.88070722  | -1.25328355 |
| H | 0.24297452 | -3.67150334 | -1.31862185 |
| H | 0.25575652 | -4.39701352 | 1.07292701  |
| H | 0.24128030 | -2.66844777 | 2.86907529  |
| H | 0.15727364 | 5.07168062  | -1.88698304 |
| H | 0.13054910 | 7.47809983  | -1.31862460 |
| H | 0.11776120 | 8.20361119  | 1.07292387  |
| H | 0.15916352 | 4.06132021  | 2.29912738  |
| H | 0.19505760 | 0.95761582  | -4.91910048 |
| H | 0.17848023 | 2.84899885  | -4.91909197 |
| C | 0.18676591 | 1.90330469  | -4.33804757 |
| O | 0.18676425 | 1.90329924  | -3.12224829 |

### Formaldehyde-1,3-diphenylthiourea

*E*: -4504.57

*H*: -4341.86

*G*: -4379.59

*N*<sub>imag</sub> = 0

|   |             |             |             |
|---|-------------|-------------|-------------|
| N | 0.14227043  | 3.03602369  | -0.06349009 |
| N | 0.23225054  | 0.77083317  | -0.06276762 |
| C | 0.18635320  | 1.90360441  | 0.73573897  |
| C | 0.18692813  | -0.60624153 | 0.24737387  |
| C | 0.70448121  | -1.48115864 | -0.72992234 |
| C | 0.66498974  | -2.86203967 | -0.54246400 |
| C | 0.11215257  | -3.39828749 | 0.62648597  |
| C | -0.40641585 | -2.53082705 | 1.59307808  |
| C | -0.37951482 | -1.14469714 | 1.41561533  |
| C | 0.18658842  | 4.41310470  | 0.24691265  |
| C | -0.33374840 | 5.28794416  | -0.72889427 |
| C | -0.29492150 | 6.66880764  | -0.54092256 |

|   |             |             |             |
|---|-------------|-------------|-------------|
| C | 0.25993534  | 7.20495967  | 0.62709668  |
| C | 0.78131156  | 6.33751955  | 1.59222714  |
| C | 0.75517626  | 4.95147302  | 1.41413801  |
| H | 1.22209644  | 6.74026321  | 2.50174522  |
| H | 1.14522639  | -1.06688752 | -1.63577605 |
| S | 0.18439365  | 1.90433157  | 2.41062578  |
| H | -0.03829490 | 2.86353674  | -1.04997149 |
| H | -0.77927098 | -0.48309629 | 2.17179392  |
| H | 0.41369279  | 0.94313463  | -1.04912443 |
| H | 1.07368938  | -3.51837072 | -1.30773950 |
| H | 0.08603368  | -4.47438719 | 0.77964223  |
| H | -0.84555288 | -2.93358900 | 2.50338619  |
| H | -0.77619723 | 4.87367584  | -1.63391371 |
| H | -0.70578798 | 7.32516028  | -1.30501680 |
| H | 0.28548260  | 8.28101209  | 0.78068657  |
| H | 1.15722599  | 4.28988376  | 2.16912233  |
| H | 0.55473489  | 1.03003938  | -4.73463871 |
| H | -0.17624214 | 2.77465536  | -4.73534419 |
| C | 0.18897972  | 1.90247116  | -4.15413267 |
| O | 0.18842359  | 1.90273082  | -2.93814686 |

### Formaldehyde-1,3-diphenylselenourea

*E*: -4482.93

*H*: -4320.06

*G*: -4360.41

*N*<sub>imag</sub> = 0

|    |             |             |             |
|----|-------------|-------------|-------------|
| N  | -0.06014730 | 1.13085606  | 0.04731188  |
| N  | 0.06014730  | -1.13085606 | 0.04731188  |
| C  | 0.00000000  | -0.00000000 | 0.83291408  |
| C  | 0.00269119  | -2.50491123 | 0.38443809  |
| C  | 0.71668479  | -3.39204335 | -0.44167640 |
| C  | 0.66856104  | -4.76801340 | -0.21178301 |
| C  | -0.08819818 | -5.27680461 | 0.84946115  |
| C  | -0.80441031 | -4.39320103 | 1.66475071  |
| C  | -0.77131940 | -3.01508027 | 1.43880763  |
| C  | -0.00269119 | 2.50491123  | 0.38443809  |
| C  | -0.71668479 | 3.39204335  | -0.44167640 |
| C  | -0.66856104 | 4.76801340  | -0.21178301 |
| C  | 0.08819818  | 5.27680461  | 0.84946115  |
| C  | 0.80441031  | 4.39320103  | 1.66475071  |
| C  | 0.77131940  | 3.01508027  | 1.43880763  |
| H  | 1.40434869  | 4.77790751  | 2.48667062  |
| H  | 1.31935120  | -2.99427400 | -1.25681160 |
| Se | 0.00000000  | -0.00000000 | 2.67688616  |
| H  | -0.27237192 | 0.96938591  | -0.93580373 |
| H  | -1.32726699 | -2.33689784 | 2.07298175  |
| H  | 0.27237192  | -0.96938591 | -0.93580373 |
| H  | 1.23123964  | -5.43966249 | -0.85639729 |
| H  | -0.12052806 | -6.34734334 | 1.03715830  |
| H  | -1.40434869 | -4.77790751 | 2.48667062  |
| H  | -1.31935120 | 2.99427400  | -1.25681160 |
| H  | -1.23123964 | 5.43966249  | -0.85639729 |
| H  | 0.12052806  | 6.34734334  | 1.03715830  |
| H  | 1.32726699  | 2.33689784  | 2.07298175  |
| H  | 0.42550597  | -0.84466544 | -4.61145154 |
| H  | -0.42550597 | 0.84466544  | -4.61145154 |
| C  | 0.00000000  | -0.00000000 | -4.03077073 |
| O  | 0.00000000  | -0.00000000 | -2.81434258 |

### Formaldehyde-1,3-bis[3-(trifluoromethyl)phenyl]urea

*E*: -5378.32

*H*: -5204.75

*G*: -5252.56

$N_{imag} = 0$

|   |             |             |             |
|---|-------------|-------------|-------------|
| N | 0.00897777  | 1.15194557  | 0.23712105  |
| N | -0.00897777 | -1.15194557 | 0.23712105  |
| C | 0.00000000  | -0.00000000 | 1.02685307  |
| C | -0.02229998 | -2.49333209 | 0.65611415  |
| C | -0.02502089 | -3.47025066 | -0.35798771 |
| C | -0.04493502 | -4.82587772 | -0.03244235 |
| C | -0.05736069 | -5.23903916 | 1.30657467  |
| C | -0.05353113 | -4.26557998 | 2.30731736  |
| C | -0.03586364 | -2.90219407 | 2.00319160  |
| C | 0.02229998  | 2.49333209  | 0.65611415  |
| C | 0.02502089  | 3.47025066  | -0.35798771 |
| C | 0.04493502  | 4.82587772  | -0.03244235 |
| C | 0.05736069  | 5.23903916  | 1.30657467  |
| C | 0.05353113  | 4.26557998  | 2.30731736  |
| C | 0.03586364  | 2.90219407  | 2.00319160  |
| F | 0.47496786  | 5.37870915  | -2.32830831 |
| H | -0.01822349 | -3.16501933 | -1.40094739 |
| O | 0.00000000  | -0.00000000 | 2.25514199  |
| H | 0.00482112  | 1.02017145  | -0.77084542 |
| H | -0.03464821 | -2.15467091 | 2.78499001  |
| H | -0.00482112 | -1.02017145 | -0.77084542 |
| C | 0.00710607  | -5.85628083 | -1.13340533 |
| H | -0.07544453 | -6.29522280 | 1.55569429  |
| F | 0.71549839  | 6.98013780  | -0.83286883 |
| H | 0.01822349  | 3.16501933  | -1.40094739 |
| C | -0.00710607 | 5.85628083  | -1.13340533 |
| H | 0.07544453  | 6.29522280  | 1.55569429  |
| H | 0.03464821  | 2.15467091  | 2.78499001  |
| F | 1.29632919  | -6.27756200 | -1.37947160 |
| F | -0.47496786 | -5.37870915 | -2.32830831 |
| F | -0.71549839 | -6.98013780 | -0.83286883 |
| F | -1.29632919 | 6.27756200  | -1.37947160 |
| H | 0.06663936  | 4.57044849  | 3.35105584  |
| H | -0.06663936 | -4.57044849 | 3.35105584  |
| H | -0.00609724 | -0.94597226 | -4.39717925 |
| H | 0.00609724  | 0.94597226  | -4.39717925 |
| C | -0.00000000 | -0.00000000 | -3.81822171 |
| O | -0.00000000 | -0.00000000 | -2.60097896 |

### Formaldehyde-1,3-bis[3-(trifluoromethyl)phenyl]thiourea

**E:** -5295.39

**H:** -5123.61

**G:** -5170.58

$N_{imag} = 0$

|   |             |             |             |
|---|-------------|-------------|-------------|
| N | -0.94076821 | 0.61734903  | 0.55031729  |
| N | 1.22600294  | 0.03615879  | 0.25421073  |
| C | 0.35579668  | 0.81517389  | 1.00355377  |
| C | 2.61705638  | -0.17836268 | 0.30117604  |
| C | 3.13073630  | -0.99011925 | -0.73201836 |
| C | 4.48840786  | -1.29416973 | -0.78817418 |
| C | 5.37224561  | -0.79252880 | 0.17797451  |
| C | 4.86013049  | 0.00909077  | 1.19800836  |
| C | 3.49977127  | 0.32192010  | 1.27490611  |
| C | -2.18651602 | 1.16478353  | 0.91319843  |
| C | -3.30003902 | 0.60222592  | 0.25448612  |
| C | -4.58693761 | 1.06842596  | 0.51026291  |
| C | -4.80083031 | 2.10171143  | 1.43374930  |
| C | -3.69714822 | 2.65544448  | 2.08227874  |
| C | -2.39687130 | 2.20495922  | 1.83591392  |
| F | -5.41816685 | -0.22218935 | -1.33555214 |
| H | 2.45843694  | -1.38667790 | -1.48803926 |

|   |             |             |             |
|---|-------------|-------------|-------------|
| S | 0.79998190  | 1.83285680  | 2.25641470  |
| H | -1.03779282 | -0.07848470 | -0.18665195 |
| H | 3.11776807  | 0.94486381  | 2.07143909  |
| H | 0.79223324  | -0.48412247 | -0.50596904 |
| C | 5.02172399  | -2.12368163 | -1.93015744 |
| H | 6.43011935  | -1.03138878 | 0.13260995  |
| F | -6.74685631 | 1.31936721  | -0.48827194 |
| H | -3.15055584 | -0.19905152 | -0.46413900 |
| C | -5.76626269 | 0.41785202  | -0.16987515 |
| H | -5.80482673 | 2.46401097  | 1.63107927  |
| H | -1.55137766 | 2.64392904  | 2.34669382  |
| F | 5.54116963  | -1.33795171 | -2.93521384 |
| F | 4.05325114  | -2.90500020 | -2.51430481 |
| F | 6.02862173  | -2.96493084 | -1.53756771 |
| F | -6.35824580 | -0.53407016 | 0.63058334  |
| H | -3.84423212 | 3.46154157  | 2.79709358  |
| H | 5.53040996  | 0.40169897  | 1.95890960  |
| H | -0.17954655 | -2.67711109 | -3.25910577 |
| H | -2.00359903 | -2.32474359 | -2.89863577 |
| C | -0.93818476 | -2.14949652 | -2.64622722 |
| O | -0.61510564 | -1.40928258 | -1.73495602 |

### Formaldehyde-1,3-bis[3-(trifluoromethyl)phenyl]selenourea

**E:** -5273.48

**H:** -5102.81

**G:** -5148.41

**N<sub>imag</sub>** = 0

|    |             |             |             |
|----|-------------|-------------|-------------|
| N  | 0.05068670  | 1.12932955  | 0.36387432  |
| N  | -0.05068670 | -1.12932955 | 0.36387432  |
| C  | -0.00000000 | -0.00000000 | 1.15468111  |
| C  | -0.21294794 | -2.49562229 | 0.68036322  |
| C  | 0.31566766  | -3.41173652 | -0.24545370 |
| C  | 0.15539263  | -4.78454210 | -0.05052489 |
| C  | -0.51989320 | -5.26777972 | 1.07748801  |
| C  | -1.04862306 | -4.35187186 | 1.98963514  |
| C  | -0.91079299 | -2.97496174 | 1.80158445  |
| C  | 0.21294794  | 2.49562229  | 0.68036322  |
| C  | -0.31566766 | 3.41173652  | -0.24545370 |
| C  | -0.15539263 | 4.78454210  | -0.05052489 |
| C  | 0.51989320  | 5.26777972  | 1.07748801  |
| C  | 1.04862306  | 4.35187186  | 1.98963514  |
| C  | 0.91079299  | 2.97496174  | 1.80158445  |
| F  | -0.84694408 | 5.22572983  | -2.30333253 |
| H  | 0.85219590  | -3.04741731 | -1.11757252 |
| Se | 0.00000000  | 0.00000000  | 2.99647198  |
| H  | -0.14501675 | 0.97710345  | -0.62490900 |
| H  | -1.33025293 | -2.27507505 | 2.51169097  |
| H  | 0.14501675  | -0.97710345 | -0.62490900 |
| C  | 0.77347904  | -5.74802677 | -1.03328423 |
| H  | -0.63845700 | -6.33583388 | 1.22972142  |
| F  | -0.07529258 | 6.92210222  | -1.12525262 |
| H  | -0.85219590 | 3.04741731  | -1.11757252 |
| C  | -0.77347904 | 5.74802677  | -1.03328423 |
| H  | 0.63845700  | 6.33583388  | 1.22972142  |
| H  | 1.33025293  | 2.27507505  | 2.51169097  |
| F  | 2.06130900  | -6.08605015 | -0.68158013 |
| F  | 0.84694408  | -5.22572983 | -2.30333253 |
| F  | 0.07529258  | -6.92210222 | -1.12525262 |
| F  | -2.06130900 | 6.08605015  | -0.68158013 |
| H  | 1.58962478  | 4.71326929  | 2.86072641  |
| H  | -1.58962478 | -4.71326929 | 2.86072641  |
| H  | 0.26696135  | -0.90774590 | -4.26547080 |
| H  | -0.26696135 | 0.90774590  | -4.26547080 |

|   |            |             |             |
|---|------------|-------------|-------------|
| C | 0.00000000 | -0.00000000 | -3.68707115 |
| O | 0.00000000 | -0.00000000 | -2.46948305 |

### Formaldehyde-1,3-bis[3,5-bis(trifluoromethyl)phenyl]urea

**E:** -6164.47

**H:** -5982.69

**G:** -6038.97

$N_{imag} = 0$

|   |              |             |             |
|---|--------------|-------------|-------------|
| H | -2.84625191  | -0.05379943 | 3.97625614  |
| H | -4.89489854  | -0.05499483 | 3.97625304  |
| N | -5.02343068  | -0.06273296 | 2.96742562  |
| C | -3.87057256  | -0.05442479 | 2.17785454  |
| H | -7.05267928  | -0.04798157 | 4.59002750  |
| N | -2.71771728  | -0.04607840 | 2.96742894  |
| H | -1.73995370  | 0.00573026  | 0.41425462  |
| O | -3.87056930  | -0.05443441 | 0.95127873  |
| C | -1.38150003  | -0.03437292 | 2.53976736  |
| C | -0.39397619  | -0.04501952 | 3.54435410  |
| C | 0.95625680   | -0.02536141 | 3.20602744  |
| C | 1.36018423   | 0.00015245  | 1.86574433  |
| C | 0.37536466   | 0.01152327  | 0.87700857  |
| C | -0.98777107  | -0.00692195 | 1.19131152  |
| H | -0.68846437  | -0.06083123 | 4.59003094  |
| C | 2.00164408   | -0.08775287 | 4.29617793  |
| H | 2.41128378   | 0.02073431  | 1.60348295  |
| C | 0.76928335   | 0.00599216  | -0.58605054 |
| C | -6.35964774  | -0.07443681 | 2.53976242  |
| C | -6.75338011  | -0.10190237 | 1.19130841  |
| C | -8.11651799  | -0.12031892 | 0.87700832  |
| C | -9.10133444  | -0.10893949 | 1.86574543  |
| C | -8.69740310  | -0.08346515 | 3.20602888  |
| C | -7.34717021  | -0.06377906 | 3.54435130  |
| H | -6.00119968  | -0.11452065 | 0.41424850  |
| C | -8.51042896  | -0.11479193 | -0.58605288 |
| H | -10.15243438 | -0.12952223 | 1.60348662  |
| C | -9.74279029  | -0.02113231 | 4.29618262  |
| F | -8.32282152  | 1.12456933  | -1.14965129 |
| F | -9.82535447  | -0.44091350 | -0.77493812 |
| F | -7.76566750  | -0.99720859 | -1.32120397 |
| F | 2.08414742   | 0.33236140  | -0.77494414 |
| F | 0.58192908   | -1.23344212 | -1.14957589 |
| F | 0.02435351   | 0.88821441  | -1.32125995 |
| F | 2.42588820   | -1.37778117 | 4.51596089  |
| F | 1.53076333   | 0.37672316  | 5.49912180  |
| F | 3.11469952   | 0.64432188  | 3.98992935  |
| F | -10.16708208 | 1.26887694  | 4.51598153  |
| F | -9.27189124  | -0.48560393 | 5.49912099  |
| F | -10.85582058 | -0.75324299 | 3.98992614  |
| C | -3.87057802  | -0.05438139 | 7.00502259  |
| O | -3.87057756  | -0.05438784 | 5.78709157  |
| H | -4.81640363  | -0.05266208 | 7.58344124  |
| H | -2.92475280  | -0.05609983 | 7.58344187  |

### $C_{2v}$ symmetry enforced

**E:** -6164.31

**H:** -5983.15

**G:** -6037.12

$N_{imag} = 4$  (-5.7; -6.0; -6.2; -7.3  $\text{cm}^{-1}$ )

|   |             |            |             |
|---|-------------|------------|-------------|
| H | 1.02250541  | 0.00000000 | 1.38235625  |
| H | -1.02250541 | 0.00000000 | 1.38235625  |
| N | -1.15253537 | 0.00000000 | 0.37363306  |
| C | -0.00000000 | 0.00000000 | -0.41666650 |

|   |             |             |             |
|---|-------------|-------------|-------------|
| H | -3.18211674 | 0.00000000  | 1.99725311  |
| N | 1.15253537  | 0.00000000  | 0.37363306  |
| H | 2.13140298  | 0.00000000  | -2.17968708 |
| O | -0.00000000 | 0.00000000  | -1.64328007 |
| C | 2.48998555  | 0.00000000  | -0.05042175 |
| C | 3.47551039  | 0.00000000  | 0.95014550  |
| C | 4.83008190  | 0.00000000  | 0.61014191  |
| C | 5.23131753  | 0.00000000  | -0.72532074 |
| C | 4.24212985  | 0.00000000  | -1.71742078 |
| C | 2.88377876  | 0.00000000  | -1.40405837 |
| H | 3.18211674  | 0.00000000  | 1.99725311  |
| C | 5.84560695  | 0.00000000  | 1.72960261  |
| H | 6.28284966  | 0.00000000  | -0.98830178 |
| C | 4.68906191  | 0.00000000  | -3.16473588 |
| C | -2.48998555 | 0.00000000  | -0.05042175 |
| C | -2.88377876 | 0.00000000  | -1.40405837 |
| C | -4.24212985 | 0.00000000  | -1.71742078 |
| C | -5.23131753 | 0.00000000  | -0.72532074 |
| C | -4.83008190 | 0.00000000  | 0.61014191  |
| C | -3.47551039 | 0.00000000  | 0.95014550  |
| H | -2.13140298 | 0.00000000  | -2.17968708 |
| C | -4.68906191 | 0.00000000  | -3.16473588 |
| H | -6.28284966 | 0.00000000  | -0.98830178 |
| C | -5.84560695 | 0.00000000  | 1.72960261  |
| F | -5.46176589 | 1.10034866  | -3.45023031 |
| F | -5.46176589 | -1.10034866 | -3.45023031 |
| F | -3.64910062 | 0.00000000  | -4.04483698 |
| F | 5.46176589  | 1.10034866  | -3.45023031 |
| F | 5.46176589  | -1.10034866 | -3.45023031 |
| F | 3.64910062  | 0.00000000  | -4.04483698 |
| F | 5.70135442  | -1.09979642 | 2.54467826  |
| F | 5.70135442  | 1.09979642  | 2.54467826  |
| F | 7.13203689  | 0.00000000  | 1.28058648  |
| F | -5.70135442 | 1.09979642  | 2.54467826  |
| F | -5.70135442 | -1.09979642 | 2.54467826  |
| F | -7.13203689 | 0.00000000  | 1.28058648  |
| C | -0.00000000 | 0.00000000  | 4.41131358  |
| O | -0.00000000 | 0.00000000  | 3.19337973  |
| H | -0.94577903 | 0.00000000  | 4.98979515  |
| H | 0.94577903  | 0.00000000  | 4.98979515  |

### Formaldehyde-1,3-bis[3,5-bis(trifluoromethyl)phenyl]thiourea

*E*: -6081.27

*H*: -5901.44

*G*: -5956.41

*N*<sub>imag</sub> = 0

|   |             |             |             |
|---|-------------|-------------|-------------|
| H | -0.16306477 | -0.96533739 | 1.12358460  |
| H | 0.16306477  | 0.96533739  | 1.12358460  |
| N | 0.00299116  | 1.13279501  | 0.13155202  |
| C | 0.00000000  | -0.00000000 | -0.67231653 |
| H | 0.77834192  | 2.99363012  | 1.74610743  |
| N | -0.00299116 | -1.13279501 | 0.13155202  |
| H | 0.93947786  | -2.35590241 | -2.15113500 |
| S | 0.00000000  | -0.00000000 | -2.34127943 |
| C | 0.06257729  | -2.50157033 | -0.18418685 |
| C | -0.38132521 | -3.38800348 | 0.81455216  |
| C | -0.31105357 | -4.76633892 | 0.62065997  |
| C | 0.18817512  | -5.29506591 | -0.57363964 |
| C | 0.63461730  | -4.40899815 | -1.55749232 |
| C | 0.58290351  | -3.02374531 | -1.38012351 |
| H | -0.77834192 | -2.99363012 | 1.74610743  |
| C | -0.83782155 | -5.69130886 | 1.69404052  |
| H | 0.24215842  | -6.36681571 | -0.72554021 |

|   |             |             |             |
|---|-------------|-------------|-------------|
| C | 1.15207985  | -4.95856422 | -2.87110835 |
| C | -0.06257729 | 2.50157033  | -0.18418685 |
| C | -0.58290351 | 3.02374531  | -1.38012351 |
| C | -0.63461730 | 4.40899815  | -1.55749232 |
| C | -0.18817512 | 5.29506591  | -0.57363964 |
| C | 0.31105357  | 4.76633892  | 0.62065997  |
| C | 0.38132521  | 3.38800348  | 0.81455216  |
| H | -0.93947786 | 2.35590241  | -2.15113500 |
| C | -1.15207985 | 4.95856422  | -2.87110835 |
| H | -0.24215842 | 6.36681571  | -0.72554021 |
| C | 0.83782155  | 5.69130886  | 1.69404052  |
| F | -0.13989444 | 5.08857489  | -3.79136343 |
| F | -1.71280487 | 6.19976393  | -2.72532583 |
| F | -2.09910940 | 4.15082991  | -3.43590863 |
| F | 1.71280487  | -6.19976393 | -2.72532583 |
| F | 0.13989444  | -5.08857489 | -3.79136343 |
| F | 2.09910940  | -4.15082991 | -3.43590863 |
| F | -2.18298622 | -5.93091442 | 1.54142218  |
| F | -0.67843444 | -5.16515689 | 2.95367203  |
| F | -0.21653902 | -6.90762137 | 1.68465936  |
| F | 2.18298622  | 5.93091442  | 1.54142218  |
| F | 0.67843444  | 5.16515689  | 2.95367203  |
| F | 0.21653902  | 6.90762137  | 1.68465936  |
| C | -0.00000000 | -0.00000000 | 4.17466944  |
| O | -0.00000000 | -0.00000000 | 2.95655845  |
| H | 0.26148519  | 0.90916412  | 4.75262215  |
| H | -0.26148519 | -0.90916412 | 4.75262215  |

**C<sub>2v</sub> symmetry enforced**

**E:** -6081.00

**H:** -5901.09

**G:** -5956.26

**N<sub>imag</sub>** = 6 (-8.8; -9.9; -10.9 -13.4; -13.5; -14.1 cm<sup>-1</sup>)

|   |             |             |             |
|---|-------------|-------------|-------------|
| H | 0.94885540  | 0.00000000  | 1.03489333  |
| H | -0.94885540 | -0.00000000 | 1.03489333  |
| N | -1.13152530 | 0.00000000  | 0.03289127  |
| C | 0.00000000  | -0.00000000 | -0.77388354 |
| H | -2.91402575 | -0.00000000 | 1.88154573  |
| N | 1.13152530  | -0.00000000 | 0.03289127  |
| H | 2.45970883  | -0.00000000 | -2.40053103 |
| S | 0.00000000  | 0.00000000  | -2.44417857 |
| C | 2.50974212  | -0.00000000 | -0.24251165 |
| C | 3.35077864  | -0.00000000 | 0.88565130  |
| C | 4.73814415  | -0.00000000 | 0.74120099  |
| C | 5.32332347  | -0.00000000 | -0.52546146 |
| C | 4.48181753  | -0.00000000 | -1.64404044 |
| C | 3.09210197  | -0.00000000 | -1.52475634 |
| H | 2.91402575  | 0.00000000  | 1.88154573  |
| C | 5.58453298  | 0.00000000  | 1.99358750  |
| H | 6.40139658  | -0.00000000 | -0.63873523 |
| C | 5.12358586  | 0.00000000  | -3.01674841 |
| C | -2.50974212 | 0.00000000  | -0.24251165 |
| C | -3.09210197 | 0.00000000  | -1.52475634 |
| C | -4.48181753 | 0.00000000  | -1.64404044 |
| C | -5.32332347 | 0.00000000  | -0.52546146 |
| C | -4.73814415 | 0.00000000  | 0.74120099  |
| C | -3.35077864 | 0.00000000  | 0.88565130  |
| H | -2.45970883 | 0.00000000  | -2.40053103 |
| C | -5.12358586 | -0.00000000 | -3.01674841 |
| H | -6.40139658 | 0.00000000  | -0.63873523 |
| C | -5.58453298 | -0.00000000 | 1.99358750  |
| F | -5.92789139 | 1.10034949  | -3.19294218 |
| F | -5.92789139 | -1.10034949 | -3.19294218 |
| F | -4.21392470 | -0.00000000 | -4.03060124 |

|   |             |             |             |
|---|-------------|-------------|-------------|
| F | 5.92789139  | 1.10034949  | -3.19294218 |
| F | 5.92789139  | -1.10034949 | -3.19294218 |
| F | 4.21392470  | 0.00000000  | -4.03060124 |
| F | 5.32551027  | -1.09969657 | 2.78019390  |
| F | 5.32551027  | 1.09969657  | 2.78019390  |
| F | 6.92112199  | 0.00000000  | 1.73156037  |
| F | -5.32551027 | 1.09969657  | 2.78019390  |
| F | -5.32551027 | -1.09969657 | 2.78019390  |
| F | -6.92112199 | -0.00000000 | 1.73156037  |
| C | 0.00000000  | 0.00000000  | 4.09391448  |
| O | 0.00000000  | -0.00000000 | 2.87558889  |
| H | -0.94586984 | 0.00000000  | 4.67183125  |
| H | 0.94586984  | -0.00000000 | 4.67183125  |

### Formaldehyde-1,3-bis[3,5-bis(trifluoromethyl)phenyl]selenourea

*E*: -6059.59

*H*: -5880.29

*G*: -5935.88

*N*<sub>imag</sub> = 0

|    |             |             |             |
|----|-------------|-------------|-------------|
| H  | -0.21862778 | -0.99217372 | 1.27411188  |
| H  | 0.21862778  | 0.99217372  | 1.27411188  |
| N  | 0.00946360  | 1.13398771  | 0.28611229  |
| C  | 0.00000000  | -0.00000000 | -0.49979239 |
| H  | 1.29862218  | 3.06655476  | 1.47417451  |
| N  | -0.00946360 | -1.13398771 | 0.28611229  |
| H  | 1.47432550  | -2.24039428 | -1.71292951 |
| Se | 0.00000000  | -0.00000000 | -2.33772972 |
| C  | 0.07042182  | -2.49139515 | -0.09203797 |
| C  | -0.66058200 | -3.41527739 | 0.66655583  |
| C  | -0.58818288 | -4.78035451 | 0.37254014  |
| C  | 0.20264502  | -5.24004238 | -0.68161901 |
| C  | 0.93912466  | -4.31000852 | -1.42498023 |
| C  | 0.88791965  | -2.94481049 | -1.13970038 |
| H  | -1.29862218 | -3.06655476 | 1.47417451  |
| C  | -1.34485151 | -5.75597942 | 1.24356920  |
| H  | 0.25206138  | -6.29745761 | -0.91465616 |
| C  | 1.78059849  | -4.79495867 | -2.58626176 |
| C  | -0.07042182 | 2.49139515  | -0.09203797 |
| C  | -0.88791965 | 2.94481049  | -1.13970038 |
| C  | -0.93912466 | 4.31000852  | -1.42498023 |
| C  | -0.20264502 | 5.24004238  | -0.68161901 |
| C  | 0.58818288  | 4.78035451  | 0.37254014  |
| C  | 0.66058200  | 3.41527739  | 0.66655583  |
| H  | -1.47432550 | 2.24039428  | -1.71292951 |
| C  | -1.78059849 | 4.79495867  | -2.58626176 |
| H  | -0.25206138 | 6.29745761  | -0.91465616 |
| C  | 1.34485151  | 5.75597942  | 1.24356920  |
| F  | -1.03480511 | 4.90609725  | -3.73433441 |
| F  | -2.31918842 | 6.03279844  | -2.34738984 |
| F  | -2.81792915 | 3.95023759  | -2.86665148 |
| F  | 2.31918842  | -6.03279844 | -2.34738984 |
| F  | 1.03480511  | -4.90609725 | -3.73433441 |
| F  | 2.81792915  | -3.95023759 | -2.86665148 |
| F  | -2.57498876 | -5.27189602 | 1.61173398  |
| F  | -0.66569375 | -6.01364621 | 2.41544864  |
| F  | -1.54830407 | -6.95884817 | 0.63303229  |
| F  | 2.57498876  | 5.27189602  | 1.61173398  |
| F  | 0.66569375  | 6.01364621  | 2.41544864  |
| F  | 1.54830407  | 6.95884817  | 0.63303229  |
| C  | 0.00000000  | -0.00000000 | 4.31681001  |
| O  | -0.00000000 | -0.00000000 | 3.09873131  |
| H  | 0.33417087  | 0.88491974  | 4.89513701  |
| H  | -0.33417087 | -0.88491974 | 4.89513701  |



**C<sub>2v</sub> symmetry enforced****E:** -6058.87**H:** -5879.91**G:** -5933.79**N<sub>imag</sub>** = 6 (-8.1; -9.3; -10.0; -11.9; -14.9; -15.1 cm<sup>-1</sup>)

|    |             |             |             |
|----|-------------|-------------|-------------|
| H  | 0.94017144  | 0.00000000  | 0.98536820  |
| H  | -0.94017144 | -0.00000000 | 0.98536820  |
| N  | -1.12800126 | -0.00000000 | -0.01663463 |
| C  | 0.00000000  | 0.00000000  | -0.81756555 |
| H  | -2.87211020 | -0.00000000 | 1.86314494  |
| N  | 1.12800126  | 0.00000000  | -0.01663463 |
| H  | 2.50431446  | -0.00000000 | -2.42670295 |
| Se | 0.00000000  | 0.00000000  | -2.65652610 |
| C  | 2.51204769  | -0.00000000 | -0.26896379 |
| C  | 3.32939730  | 0.00000000  | 0.87648209  |
| C  | 4.71933356  | 0.00000000  | 0.76093451  |
| C  | 5.33038637  | -0.00000000 | -0.49366808 |
| C  | 4.51206833  | -0.00000000 | -1.62913286 |
| C  | 3.12022807  | -0.00000000 | -1.53821977 |
| H  | 2.87211020  | 0.00000000  | 1.86314494  |
| C  | 5.53937670  | 0.00000000  | 2.03064432  |
| H  | 6.41061704  | -0.00000000 | -0.58469889 |
| C  | 5.18073150  | -0.00000000 | -2.98902736 |
| C  | -2.51204769 | 0.00000000  | -0.26896379 |
| C  | -3.12022807 | 0.00000000  | -1.53821977 |
| C  | -4.51206833 | 0.00000000  | -1.62913286 |
| C  | -5.33038637 | 0.00000000  | -0.49366808 |
| C  | -4.71933356 | -0.00000000 | 0.76093451  |
| C  | -3.32939730 | -0.00000000 | 0.87648209  |
| H  | -2.50431446 | 0.00000000  | -2.42670295 |
| C  | -5.18073150 | 0.00000000  | -2.98902736 |
| H  | -6.41061704 | 0.00000000  | -0.58469889 |
| C  | -5.53937670 | -0.00000000 | 2.03064432  |
| F  | -5.98839991 | 1.10035337  | -3.14918275 |
| F  | -5.98839991 | -1.10035337 | -3.14918275 |
| F  | -4.29095385 | 0.00000000  | -4.02002597 |
| F  | 5.98839991  | 1.10035337  | -3.14918275 |
| F  | 5.98839991  | -1.10035337 | -3.14918275 |
| F  | 4.29095385  | -0.00000000 | -4.02002597 |
| F  | 5.26382827  | -1.09967487 | 2.81176008  |
| F  | 5.26382827  | 1.09967487  | 2.81176008  |
| F  | 6.88101296  | 0.00000000  | 1.79658223  |
| F  | -5.26382827 | 1.09967487  | 2.81176008  |
| F  | -5.26382827 | -1.09967487 | 2.81176008  |
| F  | -6.88101296 | -0.00000000 | 1.79658223  |
| C  | 0.00000000  | 0.00000000  | 4.04865235  |
| O  | 0.00000000  | 0.00000000  | 2.83014374  |
| H  | -0.94587956 | 0.00000000  | 4.62641112  |
| H  | 0.94587956  | -0.00000000 | 4.62641112  |

**Formaldehyde-1-phenyl-3-[3,5-bis(trifluoromethyl)phenyl]urea****E:** -5376.46**H:** -5202.98**G:** -5251.39**N<sub>imag</sub>** = 0

|   |             |             |             |
|---|-------------|-------------|-------------|
| N | -0.89608056 | -1.06096431 | -0.07995655 |
| N | -0.82598198 | 1.24078745  | -0.00072550 |
| C | -0.09439564 | 0.06876543  | 0.15004694  |
| C | -0.38579265 | 2.57548452  | 0.14395318  |
| C | -1.34395274 | 3.58589320  | -0.07092339 |
| C | -0.99467677 | 4.92992563  | 0.05121398  |

|   |             |             |             |
|---|-------------|-------------|-------------|
| C | 0.31487625  | 5.29089737  | 0.38947577  |
| C | 1.26389697  | 4.28641303  | 0.60216558  |
| C | 0.93101177  | 2.93364086  | 0.48401443  |
| C | -0.52375364 | -2.40670750 | -0.02020827 |
| C | -1.52461546 | -3.35801580 | -0.30601084 |
| C | -1.24234903 | -4.72013574 | -0.25917848 |
| C | 0.04062196  | -5.17707877 | 0.06573233  |
| C | 1.02720469  | -4.22998666 | 0.34726731  |
| C | 0.76813294  | -2.85612516 | 0.30855731  |
| C | 2.43721442  | -4.68117704 | 0.66716217  |
| H | -2.36433475 | 3.31026394  | -0.33479799 |
| O | 1.09629656  | 0.01419509  | 0.44460257  |
| H | -1.87258581 | -0.89363702 | -0.31593755 |
| H | 1.66933062  | 2.16071803  | 0.64951095  |
| H | -1.80637828 | 1.14416078  | -0.24612587 |
| H | -1.74834887 | 5.69564132  | -0.11871722 |
| H | 0.58926637  | 6.33845119  | 0.48507251  |
| H | 2.28537047  | 4.55253646  | 0.86549409  |
| H | -2.52676769 | -3.02381998 | -0.55831124 |
| C | -2.31801051 | -5.71844977 | -0.61721846 |
| H | 0.25882051  | -6.23752418 | 0.10710091  |
| H | 1.54094990  | -2.13329865 | 0.53290258  |
| H | -5.65712158 | 0.13424392  | -1.03173214 |
| H | -4.95559023 | -1.61677169 | -0.89955645 |
| C | -4.77694011 | -0.52166949 | -0.87433897 |
| O | -3.66779126 | -0.05838052 | -0.68275845 |
| F | 3.27613645  | -4.50547009 | -0.40820371 |
| F | 2.49973431  | -6.00671044 | 1.00299132  |
| F | 2.98102450  | -3.97639908 | 1.70710787  |
| F | -2.23643812 | -6.10277706 | -1.93597416 |
| F | -3.58366783 | -5.21121342 | -0.44063398 |
| F | -2.23738788 | -6.86131905 | 0.12873879  |

### Formaldehyde-1-phenyl-3-[3,5-bis(trifluoromethyl)phenyl]thiourea

*E*: -5293.77

*H*: -5121.60

*G*: -5170.72

*N*<sub>imag</sub> = 0

|   |             |             |             |
|---|-------------|-------------|-------------|
| N | -0.67144979 | -0.99490727 | -0.00473801 |
| N | -0.54099844 | 1.26529960  | -0.00882838 |
| C | 0.17560588  | 0.09945260  | -0.18328667 |
| C | -0.22228520 | 2.63475286  | -0.16845300 |
| C | -1.31217396 | 3.52559061  | -0.06969786 |
| C | -1.12048928 | 4.89941586  | -0.19308455 |
| C | 0.16213566  | 5.41380385  | -0.41977010 |
| C | 1.24099476  | 4.53112946  | -0.51540855 |
| C | 1.06616261  | 3.14915690  | -0.39030487 |
| C | -0.39744977 | -2.36879030 | 0.02901370  |
| C | -1.45489180 | -3.22941793 | -0.31198844 |
| C | -1.30323885 | -4.61429075 | -0.22474111 |
| C | -0.08868666 | -5.17442863 | 0.17550123  |
| C | 0.96303908  | -4.31234070 | 0.50958415  |
| C | 0.82580235  | -2.92482899 | 0.44792565  |
| C | 2.29490251  | -4.90671745 | 0.91654853  |
| H | -2.31307849 | 3.13039116  | 0.10105004  |
| S | 1.79403818  | -0.02493122 | -0.58456388 |
| H | -1.67124462 | -0.78637540 | 0.00614862  |
| H | 1.90759749  | 2.47452638  | -0.46428472 |
| H | -1.51939541 | 1.13251251  | 0.23648211  |
| H | -1.97485449 | 5.56783300  | -0.11479865 |
| H | 0.31516631  | 6.48553835  | -0.51886253 |
| H | 2.24357036  | 4.91629565  | -0.68813415 |
| H | -2.39721429 | -2.80977496 | -0.65294184 |

|   |             |             |             |
|---|-------------|-------------|-------------|
| C | -2.46633984 | -5.49318833 | -0.61792020 |
| H | 0.03248537  | -6.24934498 | 0.23995459  |
| H | 1.64592567  | -2.27698072 | 0.72303778  |
| H | -5.42372145 | -0.44753601 | 1.01801323  |
| H | -4.39013616 | -1.98472216 | 0.63657990  |
| C | -4.45737773 | -0.87819307 | 0.68618182  |
| O | -3.51560712 | -0.16402800 | 0.39132770  |
| F | 3.06765055  | -5.20365937 | -0.18081394 |
| F | 2.14266490  | -6.07742058 | 1.61495730  |
| F | 3.02882518  | -4.06248915 | 1.70100586  |
| F | -2.61233573 | -5.57213100 | -1.98230028 |
| F | -3.66241981 | -5.00129600 | -0.13462575 |
| F | -2.34537460 | -6.77037789 | -0.15589374 |

### Formaldehyde-1-phenyl-3-[3,5-bis(trifluoromethyl)phenyl]selenourea

**E:** -5272.06

**H:** -5100.99

**G:** -5148.90

**N<sub>imag</sub>** = 0

|    |             |             |             |
|----|-------------|-------------|-------------|
| N  | -0.76886128 | -0.94643751 | -0.14061027 |
| N  | -0.69168936 | 1.30991148  | 0.00176507  |
| C  | 0.05626828  | 0.15695166  | -0.01927190 |
| C  | -0.29761843 | 2.67429841  | 0.00095473  |
| C  | -1.11796913 | 3.57513038  | 0.70123448  |
| C  | -0.82378348 | 4.93959989  | 0.70420494  |
| C  | 0.29483578  | 5.41781056  | 0.01329610  |
| C  | 1.10359725  | 4.51890224  | -0.69061457 |
| C  | 0.81386905  | 3.15250659  | -0.70872878 |
| C  | -0.48080889 | -2.31880542 | -0.06011086 |
| C  | -1.29944069 | -3.18189967 | -0.80287455 |
| C  | -1.13455977 | -4.56738224 | -0.71558315 |
| C  | -0.13479859 | -5.11511619 | 0.08829123  |
| C  | 0.68080294  | -4.24632138 | 0.82596404  |
| C  | 0.51770275  | -2.86192132 | 0.76893528  |
| C  | 1.78137627  | -4.83350025 | 1.68344453  |
| H  | -1.98038042 | 3.20050819  | 1.25058684  |
| Se | 1.89156923  | 0.07534210  | 0.08234873  |
| H  | -1.73591464 | -0.75587452 | -0.41526270 |
| H  | 1.44135643  | 2.46217011  | -1.25732615 |
| H  | -1.69042228 | 1.18159577  | 0.15197212  |
| H  | -1.46459445 | 5.62516925  | 1.25371771  |
| H  | 0.53116271  | 6.47901780  | 0.02071350  |
| H  | 1.96908553  | 4.88177911  | -1.24034045 |
| H  | -2.05883565 | -2.76616514 | -1.45934025 |
| C  | -2.04597622 | -5.44808230 | -1.53502324 |
| H  | -0.00172857 | -6.18874042 | 0.15281683  |
| H  | 1.14385112  | -2.20653056 | 1.35808872  |
| H  | -5.61598907 | -0.95447901 | -0.24557401 |
| H  | -4.34763824 | -2.31422071 | -0.59065323 |
| C  | -4.55818121 | -1.23818019 | -0.42042939 |
| O  | -3.67265150 | -0.40147323 | -0.42311922 |
| F  | 2.18706706  | -3.98421306 | 2.67282939  |
| F  | -1.78532540 | -5.34907640 | -2.88028329 |
| F  | -3.37131089 | -5.08698030 | -1.37786768 |
| F  | -1.95189239 | -6.76664916 | -1.20448603 |
| F  | 2.89354365  | -5.13590283 | 0.93476646  |
| F  | 1.38999200  | -6.00191421 | 2.28830249  |

### Formaldehyde-1-cyclohexyl-3-[3,5-bis(trifluoromethyl)phenyl]urea

**E:** -5887.63

**H:** -5671.38

**G:** -5719.66

**N<sub>imag</sub>** = 0

|   |             |             |             |
|---|-------------|-------------|-------------|
| H | 2.92222317  | 3.83977740  | 3.42019201  |
| H | 2.55835802  | 4.43777676  | 1.80291041  |
| H | 4.68840259  | 2.34001763  | 2.51196857  |
| H | 4.99945632  | 3.99753681  | 1.99342275  |
| N | 0.92408765  | 0.83850798  | 0.46190374  |
| N | -1.16655339 | -0.13157741 | 0.25292494  |
| C | -0.42365677 | 1.06187699  | 0.27866575  |
| C | -2.53683564 | -0.28972768 | 0.04686322  |
| C | -3.04298149 | -1.60549290 | 0.07222635  |
| C | -4.39788373 | -1.85056797 | -0.13615533 |
| C | -5.29101765 | -0.79844890 | -0.36738419 |
| C | -4.78520311 | 0.50426262  | -0.38396781 |
| C | -3.42884497 | 0.77561010  | -0.18357420 |
| C | -5.71403237 | 1.66165997  | -0.68443296 |
| F | -3.95483988 | -4.19567953 | -0.37560837 |
| F | -5.65223822 | 2.02411934  | -2.01094781 |
| F | -5.40494136 | 2.77890355  | 0.04133737  |
| F | -7.02479221 | 1.36103507  | -0.42234201 |
| F | -5.98099700 | -3.48619595 | -0.87731288 |
| F | -5.33595247 | -3.57938686 | 1.22369838  |
| H | -2.36787943 | -2.43608432 | 0.25499142  |
| O | -0.91667524 | 2.18110300  | 0.13266430  |
| H | 1.24084568  | -0.09519432 | 0.70335604  |
| H | -3.04826669 | 1.78825332  | -0.20023785 |
| H | -0.64170995 | -0.99617784 | 0.37766491  |
| C | -4.91609153 | -3.26611125 | -0.04942978 |
| H | -6.34528075 | -0.98910248 | -0.52862055 |
| C | 1.86180903  | 1.94738569  | 0.67698063  |
| C | 4.28058430  | 2.68644275  | 0.41062894  |
| C | 3.26630516  | 1.54614407  | 0.19308344  |
| C | 1.88811924  | 2.40730681  | 2.15112383  |
| C | 2.89729032  | 3.55236574  | 2.36139020  |
| C | 4.30539941  | 3.15501134  | 1.87854864  |
| H | 1.49283216  | 2.77799057  | 0.06380840  |
| H | 4.00833565  | 3.53497012  | -0.23469907 |
| H | 5.27987237  | 2.35968203  | 0.09576479  |
| H | 3.59648433  | 0.65563604  | 0.75255543  |
| H | 3.22176960  | 1.26347416  | -0.86619573 |
| H | 2.16696392  | 1.54838105  | 2.78135404  |
| H | 0.87933376  | 2.71735113  | 2.44667477  |
| C | 0.52140284  | -3.67174702 | 0.42798003  |
| H | 1.35024815  | -4.39851516 | 0.55240838  |
| H | -0.46070657 | -4.08282607 | 0.11208256  |
| O | 0.68550212  | -2.48286740 | 0.62876908  |

### Formaldehyde-1-cyclohexyl-3-[3,5-bis(trifluoromethyl)phenyl]thiourea

**E:** -5808.04

**H:** -5592.41

**G:** -5642.94

**N<sub>imag</sub>** = 0

|   |             |             |             |
|---|-------------|-------------|-------------|
| H | 3.24190478  | 3.46185494  | 3.66895377  |
| H | 2.77147822  | 4.31472049  | 2.20015066  |
| H | 4.83703712  | 2.04702330  | 2.38615602  |
| H | 5.19302706  | 3.74980564  | 2.09150451  |
| N | 0.83395765  | 1.04281387  | 0.50227022  |
| N | -1.21774115 | 0.08110704  | 0.27530329  |
| C | -0.51108425 | 1.26996737  | 0.42515393  |
| C | -2.57941689 | -0.16941682 | 0.06833265  |
| C | -3.03374067 | -1.46173131 | 0.38877651  |
| C | -4.35695934 | -1.83291025 | 0.14959148  |
| C | -5.26817022 | -0.92106117 | -0.38856972 |
| C | -4.81256610 | 0.36511657  | -0.69994759 |

|   |             |             |             |
|---|-------------|-------------|-------------|
| C | -3.48797512 | 0.75173436  | -0.48625911 |
| C | -5.79408961 | 1.37764742  | -1.25136895 |
| F | -3.83788144 | -4.16864265 | 0.21788938  |
| F | -5.19012561 | 2.32440814  | -2.02953014 |
| F | -6.44369119 | 2.04807562  | -0.24167960 |
| F | -6.76792244 | 0.78741973  | -2.01652017 |
| F | -5.94819009 | -3.60756902 | -0.09205395 |
| F | -5.01580375 | -3.34358986 | 1.88355129  |
| H | -2.34549940 | -2.17459574 | 0.83375182  |
| S | -1.19542668 | 2.80202904  | 0.52545892  |
| H | 1.16194314  | 0.08046702  | 0.48037606  |
| H | -3.15120297 | 1.74736689  | -0.74046858 |
| H | -0.66678826 | -0.77047435 | 0.39581968  |
| C | -4.79660175 | -3.22565252 | 0.53125790  |
| H | -6.29698485 | -1.20667144 | -0.57301998 |
| C | 1.84702398  | 2.06564228  | 0.78824426  |
| C | 4.26863192  | 2.72681050  | 0.40704923  |
| C | 3.17684037  | 1.67721566  | 0.11855290  |
| C | 2.02389189  | 2.28533196  | 2.30563839  |
| C | 3.10932198  | 3.34152941  | 2.58635955  |
| C | 4.44603128  | 2.96428614  | 1.91942173  |
| H | 1.47364177  | 2.99634544  | 0.34547255  |
| H | 3.98967412  | 3.67422617  | -0.07741041 |
| H | 5.21665266  | 2.40887611  | -0.04511034 |
| H | 3.50374462  | 0.69807266  | 0.50525576  |
| H | 3.02492955  | 1.56491070  | -0.96250021 |
| H | 2.30820444  | 1.32824397  | 2.76949245  |
| H | 1.06269123  | 2.58857753  | 2.73464197  |
| C | 0.28958456  | -3.45575235 | -0.01543448 |
| H | 1.06899208  | -4.22923133 | -0.17190555 |
| H | -0.76353499 | -3.76260124 | -0.18450259 |
| O | 0.58208801  | -2.32386914 | 0.32585928  |

### Formaldehyde-1-cyclohexyl-3-[3,5-bis(trifluoromethyl)phenyl]selenourea

**E:** -5787.11

**H:** -5571.85

**G:** -5623.11

$N_{imag} = 0$

|    |             |             |             |
|----|-------------|-------------|-------------|
| H  | 3.29175741  | 3.29963813  | 3.75069754  |
| H  | 2.75639569  | 4.24638345  | 2.36377331  |
| H  | 4.87897877  | 2.02415875  | 2.32035983  |
| H  | 5.18618253  | 3.75242347  | 2.14289403  |
| N  | 0.84286432  | 1.06169594  | 0.48754251  |
| N  | -1.18830636 | 0.06657024  | 0.25208799  |
| C  | -0.50158619 | 1.25132124  | 0.44033224  |
| C  | -2.55484894 | -0.18671871 | 0.05852298  |
| C  | -3.03039805 | -1.44059784 | 0.47227154  |
| C  | -4.36073461 | -1.80604920 | 0.24932476  |
| C  | -5.24876680 | -0.92117861 | -0.36313498 |
| C  | -4.76782629 | 0.32977406  | -0.77178148 |
| C  | -3.43781357 | 0.70505342  | -0.57824837 |
| C  | -5.73002318 | 1.30545379  | -1.41451686 |
| F  | -3.94806138 | -4.16028322 | 0.29609671  |
| F  | -5.09721164 | 2.23921226  | -2.18417040 |
| F  | -6.45549835 | 1.99171990  | -0.46966606 |
| F  | -6.64314442 | 0.66983152  | -2.21907756 |
| F  | -6.05336043 | -3.50333227 | 0.25712972  |
| F  | -4.85351521 | -3.25700095 | 2.08629628  |
| H  | -2.35861511 | -2.12601334 | 0.98165117  |
| Se | -1.29085902 | 2.91213143  | 0.65445529  |
| H  | 1.19412224  | 0.10963012  | 0.40449957  |
| H  | -3.07837967 | 1.66887897  | -0.91205388 |
| H  | -0.63251162 | -0.78619883 | 0.35377005  |

|   |             |             |             |
|---|-------------|-------------|-------------|
| C | -4.81444083 | -3.16769960 | 0.71509522  |
| H | -6.28205177 | -1.20061250 | -0.53209293 |
| C | 1.84330603  | 2.08600432  | 0.81626987  |
| C | 4.23430356  | 2.83332035  | 0.41458349  |
| C | 3.15901924  | 1.78001730  | 0.08033845  |
| C | 2.05971025  | 2.19705379  | 2.33971516  |
| C | 3.12882509  | 3.25649709  | 2.66644154  |
| C | 4.45259232  | 2.96307031  | 1.93465991  |
| H | 1.43249649  | 3.03573160  | 0.45415377  |
| H | 3.91791866  | 3.80619908  | 0.01037815  |
| H | 5.17498009  | 2.57406263  | -0.08745392 |
| H | 3.52060608  | 0.78356712  | 0.38305499  |
| H | 2.97597098  | 1.74461508  | -1.00110879 |
| H | 2.37909171  | 1.21612154  | 2.72431457  |
| H | 1.10452358  | 2.44533836  | 2.81526809  |
| C | 0.17604882  | -3.47408060 | -0.13770162 |
| H | 0.90477682  | -4.28382713 | -0.34607267 |
| H | -0.89831615 | -3.71798923 | -0.27067968 |
| O | 0.54464870  | -2.36959198 | 0.22038185  |

### Formaldehyde-5,6-dihydroindolo[2,3-b]indole (X = C; R = 3-CF<sub>3</sub>-phenyl)

*E*: -5240.42

*H*: -5079.49

*G*: -5127.24

*N*<sub>imag</sub> = 0

|   |             |             |             |
|---|-------------|-------------|-------------|
| H | -0.02980627 | -1.50621711 | -2.94640037 |
| H | 0.02980627  | 1.50621711  | -2.94640037 |
| N | 0.02286265  | 1.27013866  | -1.96204894 |
| C | 0.00000000  | 0.00000000  | -1.44850495 |
| H | 0.07231487  | 4.11426382  | -1.79068591 |
| N | -0.02286265 | -1.27013866 | -1.96204894 |
| F | 1.43503106  | 6.14350358  | 0.67478496  |
| C | -0.00000000 | -0.00000000 | -0.04675833 |
| C | -0.04127194 | -2.15659986 | -0.86542091 |
| C | -0.06502137 | -3.54474286 | -0.86622881 |
| C | -0.07166312 | -4.19535136 | 0.37673955  |
| C | -0.06128527 | -3.46451766 | 1.58278624  |
| C | -0.03760542 | -2.07080693 | 1.57712805  |
| C | -0.02693506 | -1.38354291 | 0.35262311  |
| H | -0.07231487 | -4.11426382 | -1.79068591 |
| C | -0.15019841 | -5.69547001 | 0.43172725  |
| H | -0.06602588 | -4.0022709  | 2.52731319  |
| F | 0.24472958  | -6.29196017 | -0.74124187 |
| C | 0.04127194  | 2.15659986  | -0.86542091 |
| C | 0.02693506  | 1.38354291  | 0.35262311  |
| C | 0.03760542  | 2.07080693  | 1.57712805  |
| C | 0.06128527  | 3.46451766  | 1.58278624  |
| C | 0.07166312  | 4.19535136  | 0.37673955  |
| C | 0.06502137  | 3.54474286  | -0.86622881 |
| F | -0.62831134 | 6.22760458  | 1.43029944  |
| F | -1.43503106 | -6.14350358 | 0.67478496  |
| H | 0.06602588  | 4.0022709   | 2.52731319  |
| C | 0.15019841  | 5.69547001  | 0.43172725  |
| F | 0.62831134  | -6.22760458 | 1.43029944  |
| F | -0.24472958 | 6.29196017  | -0.74124187 |
| H | -0.02509117 | -1.52295109 | 2.51559483  |
| H | 0.02509117  | 1.52295109  | 2.51559483  |
| C | -0.00000000 | -0.00000000 | -5.92144713 |
| O | -0.00000000 | -0.00000000 | -4.70464001 |
| H | 0.01984734  | 0.94473374  | -6.50377182 |
| H | -0.01984734 | -0.94473374 | -6.50377182 |

### Formaldehyde-5,6-dihydroindolo[2,3-b]indole (X = Si; R = 3-CF<sub>3</sub>-phenyl)

**E:** -5119.99  
**H:** -4962.54  
**G:** -5009.57  
 $N_{imag} = 0$

|    |             |             |             |
|----|-------------|-------------|-------------|
| H  | 1.15176733  | -2.11499704 | 0.50850642  |
| H  | -0.05384805 | -2.70367874 | -1.79626166 |
| N  | -0.14564053 | -1.69146872 | -1.86446196 |
| C  | 0.39226819  | -0.83503251 | -0.96414815 |
| H  | -1.58995061 | -2.76898891 | -3.92409077 |
| N  | 0.94855319  | -1.15720714 | 0.22759036  |
| F  | -3.02992094 | -2.85485506 | -5.91698298 |
| Si | -0.03357928 | 0.96756363  | -1.20179091 |
| C  | 0.82033641  | -0.10998757 | 1.17811975  |
| C  | 1.34171800  | -0.19074534 | 2.46849750  |
| C  | 1.09803595  | 0.86295185  | 3.35695899  |
| C  | 0.37343734  | 1.99346806  | 2.94420239  |
| C  | -0.08904123 | 2.08498238  | 1.62967611  |
| C  | 0.09223424  | 1.03673309  | 0.71346512  |
| H  | 1.91880732  | -1.05570275 | 2.78450768  |
| C  | 1.56653078  | 0.75639422  | 4.78421696  |
| H  | 0.18768524  | 2.80043587  | 3.64682310  |
| F  | 2.64638577  | -0.08049941 | 4.92534472  |
| C  | -1.17329388 | -1.08342175 | -2.63305192 |
| C  | -1.46986687 | 0.27401391  | -2.27189648 |
| C  | -2.50289563 | 0.90639047  | -2.98195694 |
| C  | -3.23854818 | 0.22967339  | -3.95720395 |
| C  | -2.90639911 | -1.09248938 | -4.29649552 |
| C  | -1.85722274 | -1.75279323 | -3.64676082 |
| F  | -4.15773784 | -1.00686079 | -6.33578671 |
| F  | 0.58209336  | 0.25452888  | 5.61304944  |
| H  | -4.05902187 | 0.72668945  | -4.46633274 |
| C  | -3.72317929 | -1.82641427 | -5.32702751 |
| F  | 1.92836582  | 1.96833416  | 5.31165388  |
| F  | -4.85622725 | -2.39380331 | -4.77734795 |
| H  | -0.61084528 | 2.98725552  | 1.31726548  |
| H  | -2.74782373 | 1.94390562  | -2.76386750 |
| C  | 0.80056224  | -5.30826088 | -0.04684043 |
| O  | 0.77331895  | -4.12424680 | -0.32876559 |
| H  | 0.38550326  | -6.07758069 | -0.72996102 |
| H  | 1.24165989  | -5.66848297 | 0.90522875  |

### Formaldehyde-5,6-dihydroindolo[2,3-b]indole (X = Ge; R = 3-CF<sub>3</sub>-phenyl)

**E:** -5090.21  
**H:** -4933.23  
**G:** -4981.34  
 $N_{imag} = 0$

|    |             |             |             |
|----|-------------|-------------|-------------|
| H  | 1.16612582  | -2.01294246 | 0.41722895  |
| H  | 0.00496706  | -2.57946700 | -1.80341028 |
| N  | -0.07394301 | -1.56753059 | -1.91496719 |
| C  | 0.44502596  | -0.70365199 | -1.02592474 |
| H  | -1.44703996 | -2.73419737 | -3.95842489 |
| N  | 1.00497844  | -1.04118540 | 0.14818589  |
| F  | -2.84453183 | -2.85227200 | -6.02651743 |
| Ge | -0.01968623 | 1.23942584  | -1.27849367 |
| C  | 0.86016974  | -0.03542238 | 1.15066554  |
| C  | 1.41051070  | -0.17950830 | 2.42333830  |
| C  | 1.15722310  | 0.81403582  | 3.37836023  |
| C  | 0.39618190  | 1.94349214  | 3.04532806  |
| C  | -0.09850091 | 2.09239838  | 1.74409482  |
| C  | 0.08482727  | 1.09966666  | 0.77495249  |
| H  | 2.02342866  | -1.04130547 | 2.67490884  |
| C  | 1.66179242  | 0.63057393  | 4.78571143  |

|   |             |             |             |
|---|-------------|-------------|-------------|
| H | 0.20197552  | 2.70403920  | 3.79593302  |
| F | 2.82794038  | -0.09442511 | 4.83634979  |
| C | -1.14332295 | -1.01283692 | -2.68057604 |
| C | -1.53438163 | 0.30976750  | -2.32179984 |
| C | -2.59791026 | 0.87316182  | -3.03568060 |
| C | -3.29324127 | 0.14394596  | -4.00778695 |
| C | -2.87881532 | -1.15452834 | -4.33601838 |
| C | -1.78432414 | -1.73791857 | -3.68384668 |
| F | -4.25165572 | -1.17674762 | -6.29904134 |
| F | 0.75390338  | -0.05228236 | 5.57192870  |
| H | -4.14638041 | 0.58310994  | -4.51646660 |
| C | -3.64356748 | -1.95878481 | -5.35439542 |
| F | 1.90186137  | 1.81921095  | 5.42109462  |
| F | -4.64531682 | -2.70909312 | -4.76920865 |
| H | -0.65379675 | 2.99464276  | 1.49433714  |
| H | -2.91067663 | 1.89370564  | -2.82250693 |
| C | 0.51565632  | -5.16377719 | 0.06859134  |
| O | 0.67606955  | -4.01611001 | -0.30500981 |
| H | 0.01241309  | -5.91727258 | -0.57127056 |
| H | 0.86626165  | -5.50411374 | 1.06441199  |

### Formaldehyde-1,3-bis[4-(trifluoromethyl)phenyl]urea

**E:** -5378.86

**H:** -5204.68

**G:** -5255.22

**N<sub>imag</sub>** = 0

|   |             |              |             |
|---|-------------|--------------|-------------|
| C | -0.17277054 | -9.40809808  | -1.80480641 |
| C | -0.19559895 | -10.75888850 | -1.48070272 |
| C | -0.21251419 | -11.15786236 | -0.13660601 |
| C | -0.19974021 | -10.18311102 | 0.86812575  |
| C | -0.17711732 | -8.82483828  | 0.55414633  |
| C | -0.08798720 | -3.43732779  | -0.79512042 |
| C | -0.07811611 | -2.45122367  | -1.80480471 |
| C | -0.05526630 | -1.10043375  | -1.48070033 |
| C | -0.03836599 | -0.70146054  | -0.13660324 |
| C | -0.05117902 | -1.67621181  | 0.86812815  |
| C | -0.07382303 | -3.03448404  | 0.55414811  |
| H | -0.11587530 | -4.98413223  | -5.86101604 |
| H | -0.16470137 | -9.10465724  | -2.85025514 |
| O | -0.12548261 | -5.92966119  | 0.80076348  |
| H | -0.11325023 | -4.90650717  | -2.22409059 |
| H | -0.17195659 | -8.07634373  | 1.33452122  |
| H | -0.13766984 | -6.95281373  | -2.22409116 |
| C | -0.12545732 | -5.92966428  | -5.28098664 |
| C | -0.18374949 | -12.61988170 | 0.21361705  |
| H | -0.03724192 | -1.37524623  | 1.91155091  |
| H | -0.08617067 | -2.75466421  | -2.85025363 |
| O | -0.12545436 | -5.92966062  | -4.06416339 |
| C | -0.06710192 | 0.76055937   | 0.21362001  |
| H | -0.07901302 | -3.78297864  | 1.33452272  |
| H | -0.21368914 | -10.48407705 | 1.91154820  |
| H | -0.13504183 | -6.87519986  | -5.86101027 |
| H | -0.04409510 | -0.35501207  | -2.27040875 |
| H | -0.20673837 | -11.50431029 | -2.27041150 |
| F | 1.10430468  | -13.11665947 | 0.26273760  |
| F | -0.85231732 | -13.39146852 | -0.70607762 |
| F | -0.74208539 | -12.88077371 | 1.43751838  |
| F | 0.49122346  | 1.02143783   | 1.43752905  |
| F | -1.35514533 | 1.25736700   | 0.26272349  |
| F | 0.60149624  | 1.53213113   | -0.70606513 |
| N | -0.10877369 | -4.77616625  | -1.21600003 |
| N | -0.14216039 | -7.08315506  | -1.21600069 |



|   |             |             |             |
|---|-------------|-------------|-------------|
| C | -0.12547441 | -5.92966079 | -0.42631370 |
| C | -0.16293493 | -8.42199389 | -0.79512179 |
